# Supplementary material
Source: publisher site journal article supplement (https://www.spandidos-publications.com/6488/downloadSupplementary)
Supplement: Supplementary file 1 [file downloadSupplementary]

## Sheet: query2map
Table SIX.Kyoto encyclopedia of genes and genomes analysis
Protein ID	KO	Name	Definition	Map ID	Map Name	URL
P02795	K14739	MT1_2	metallothionein 1/2	ko04212	Longevity regulating pathway - worm	http://www.kegg.jp/kegg-bin/show_pathway?ko04212+K14739
P02795	K14739	MT1_2	metallothionein 1/2	ko04978	Mineral absorption	http://www.kegg.jp/kegg-bin/show_pathway?ko04978+K14739
P52926	K09283	HMGA2	high mobility group AT-hook protein 2	ko05202	Transcriptional misregulation in cancer	http://www.kegg.jp/kegg-bin/show_pathway?ko05202+K09283
P52926	K09283	HMGA2	high mobility group AT-hook protein 2	ko05206	MicroRNAs in cancer	http://www.kegg.jp/kegg-bin/show_pathway?ko05206+K09283
P05121	K03982	SERPINE1, PAI1	plasminogen activator inhibitor 1	ko04066	HIF-1 signaling pathway	http://www.kegg.jp/kegg-bin/show_pathway?ko04066+K03982
P05121	K03982	SERPINE1, PAI1	plasminogen activator inhibitor 1	ko04115	p53 signaling pathway	http://www.kegg.jp/kegg-bin/show_pathway?ko04115+K03982
P05121	K03982	SERPINE1, PAI1	plasminogen activator inhibitor 1	ko04218	Cellular senescence	http://www.kegg.jp/kegg-bin/show_pathway?ko04218+K03982
P05121	K03982	SERPINE1, PAI1	plasminogen activator inhibitor 1	ko04371	Apelin signaling pathway	http://www.kegg.jp/kegg-bin/show_pathway?ko04371+K03982
P05121	K03982	SERPINE1, PAI1	plasminogen activator inhibitor 1	ko04390	Hippo signaling pathway	http://www.kegg.jp/kegg-bin/show_pathway?ko04390+K03982
P05121	K03982	SERPINE1, PAI1	plasminogen activator inhibitor 1	ko04610	Complement and coagulation cascades	http://www.kegg.jp/kegg-bin/show_pathway?ko04610+K03982
P05121	K03982	SERPINE1, PAI1	plasminogen activator inhibitor 1	ko04933	AGE-RAGE signaling pathway in diabetic complications	http://www.kegg.jp/kegg-bin/show_pathway?ko04933+K03982
P05121	K03982	SERPINE1, PAI1	plasminogen activator inhibitor 1	ko05142	Chagas disease (American trypanosomiasis)	http://www.kegg.jp/kegg-bin/show_pathway?ko05142+K03982
O15075	K08805	DCLK1_2	doublecortin-like kinase 1/2 [EC:2.7.11.1]
P04732	K14739	MT1_2	metallothionein 1/2	ko04212	Longevity regulating pathway - worm	http://www.kegg.jp/kegg-bin/show_pathway?ko04212+K14739
P04732	K14739	MT1_2	metallothionein 1/2	ko04978	Mineral absorption	http://www.kegg.jp/kegg-bin/show_pathway?ko04978+K14739
Q01628	K06566	IFITM	interferon induced transmembrane protein
P52566	K12462	ARHGDI, RHOGDI	Rho GDP-dissociation inhibitor	ko04722	Neurotrophin signaling pathway	http://www.kegg.jp/kegg-bin/show_pathway?ko04722+K12462
P52566	K12462	ARHGDI, RHOGDI	Rho GDP-dissociation inhibitor	ko04962	Vasopressin-regulated water reabsorption	http://www.kegg.jp/kegg-bin/show_pathway?ko04962+K12462
Q8IVF2
Q9BXT2	K04871	CACNG6	voltage-dependent calcium channel gamma-6	ko04010	MAPK signaling pathway	http://www.kegg.jp/kegg-bin/show_pathway?ko04010+K04871
Q9BXT2	K04871	CACNG6	voltage-dependent calcium channel gamma-6	ko04260	Cardiac muscle contraction	http://www.kegg.jp/kegg-bin/show_pathway?ko04260+K04871
Q9BXT2	K04871	CACNG6	voltage-dependent calcium channel gamma-6	ko04261	Adrenergic signaling in cardiomyocytes	http://www.kegg.jp/kegg-bin/show_pathway?ko04261+K04871
Q9BXT2	K04871	CACNG6	voltage-dependent calcium channel gamma-6	ko04921	Oxytocin signaling pathway	http://www.kegg.jp/kegg-bin/show_pathway?ko04921+K04871
Q9BXT2	K04871	CACNG6	voltage-dependent calcium channel gamma-6	ko05410	Hypertrophic cardiomyopathy (HCM)	http://www.kegg.jp/kegg-bin/show_pathway?ko05410+K04871
Q9BXT2	K04871	CACNG6	voltage-dependent calcium channel gamma-6	ko05412	Arrhythmogenic right ventricular cardiomyopathy (ARVC)	http://www.kegg.jp/kegg-bin/show_pathway?ko05412+K04871
Q9BXT2	K04871	CACNG6	voltage-dependent calcium channel gamma-6	ko05414	Dilated cardiomyopathy (DCM)	http://www.kegg.jp/kegg-bin/show_pathway?ko05414+K04871
O75326	K06529	SEMA7, CD108	semaphorin 7	ko04360	Axon guidance	http://www.kegg.jp/kegg-bin/show_pathway?ko04360+K06529
Q9NS25
Q9Y653	K08450	ADGRG1, GPR56	adhesion G-protein coupled receptor G1
Q96K17	K01527	EGD1, BTF3	nascent polypeptide-associated complex subunit beta	ko04214	Apoptosis - fly	http://www.kegg.jp/kegg-bin/show_pathway?ko04214+K01527
P02679	K03905	FGG	fibrinogen gamma chain	ko04610	Complement and coagulation cascades	http://www.kegg.jp/kegg-bin/show_pathway?ko04610+K03905
P02679	K03905	FGG	fibrinogen gamma chain	ko04611	Platelet activation	http://www.kegg.jp/kegg-bin/show_pathway?ko04611+K03905
P02679	K03905	FGG	fibrinogen gamma chain	ko05150	Staphylococcus aureus infection	http://www.kegg.jp/kegg-bin/show_pathway?ko05150+K03905
Q14697	K05546	GANAB	mannosyl-oligosaccharide alpha-1,3-glucosidase [EC:3.2.1.207]	ko00510	N-Glycan biosynthesis	http://www.kegg.jp/kegg-bin/show_pathway?ko00510+K05546
Q14697	K05546	GANAB	mannosyl-oligosaccharide alpha-1,3-glucosidase [EC:3.2.1.207]	ko01100	Metabolic pathways	http://www.kegg.jp/kegg-bin/show_pathway?ko01100+K05546
Q14697	K05546	GANAB	mannosyl-oligosaccharide alpha-1,3-glucosidase [EC:3.2.1.207]	ko04141	Protein processing in endoplasmic reticulum	http://www.kegg.jp/kegg-bin/show_pathway?ko04141+K05546
P46821	K10429	MAP1	microtubule-associated protein 1
Q14061	K02260	COX17	cytochrome c oxidase assembly protein subunit 17	ko00190	Oxidative phosphorylation	http://www.kegg.jp/kegg-bin/show_pathway?ko00190+K02260
Q14061	K02260	COX17	cytochrome c oxidase assembly protein subunit 17	ko01100	Metabolic pathways	http://www.kegg.jp/kegg-bin/show_pathway?ko01100+K02260
Q14061	K02260	COX17	cytochrome c oxidase assembly protein subunit 17	ko04714	Thermogenesis	http://www.kegg.jp/kegg-bin/show_pathway?ko04714+K02260
P27701	K06509	KAI1, CD82, TSPAN27	CD82 antigen	ko04115	p53 signaling pathway	http://www.kegg.jp/kegg-bin/show_pathway?ko04115+K06509
P21926	K06460	CD9, TSPAN29	CD9 antigen	ko04640	Hematopoietic cell lineage	http://www.kegg.jp/kegg-bin/show_pathway?ko04640+K06460
P02751	K05717	FN1	fibronectin 1	ko04151	PI3K-Akt signaling pathway	http://www.kegg.jp/kegg-bin/show_pathway?ko04151+K05717
P02751	K05717	FN1	fibronectin 1	ko04510	Focal adhesion	http://www.kegg.jp/kegg-bin/show_pathway?ko04510+K05717
P02751	K05717	FN1	fibronectin 1	ko04512	ECM-receptor interaction	http://www.kegg.jp/kegg-bin/show_pathway?ko04512+K05717
P02751	K05717	FN1	fibronectin 1	ko04810	Regulation of actin cytoskeleton	http://www.kegg.jp/kegg-bin/show_pathway?ko04810+K05717
P02751	K05717	FN1	fibronectin 1	ko04933	AGE-RAGE signaling pathway in diabetic complications	http://www.kegg.jp/kegg-bin/show_pathway?ko04933+K05717
P02751	K05717	FN1	fibronectin 1	ko05100	Bacterial invasion of epithelial cells	http://www.kegg.jp/kegg-bin/show_pathway?ko05100+K05717
P02751	K05717	FN1	fibronectin 1	ko05135	Yersinia infection	http://www.kegg.jp/kegg-bin/show_pathway?ko05135+K05717
P02751	K05717	FN1	fibronectin 1	ko05146	Amoebiasis	http://www.kegg.jp/kegg-bin/show_pathway?ko05146+K05717
P02751	K05717	FN1	fibronectin 1	ko05165	Human papillomavirus infection	http://www.kegg.jp/kegg-bin/show_pathway?ko05165+K05717
P02751	K05717	FN1	fibronectin 1	ko05200	Pathways in cancer	http://www.kegg.jp/kegg-bin/show_pathway?ko05200+K05717
P02751	K05717	FN1	fibronectin 1	ko05205	Proteoglycans in cancer	http://www.kegg.jp/kegg-bin/show_pathway?ko05205+K05717
P02751	K05717	FN1	fibronectin 1	ko05222	Small cell lung cancer	http://www.kegg.jp/kegg-bin/show_pathway?ko05222+K05717
Q96S97
Q14533	K07605	KRT2	type II keratin, basic
O14495	K01080	PLPP1_2_3	phosphatidate phosphatase [EC:3.1.3.4]	ko00561	Glycerolipid metabolism	http://www.kegg.jp/kegg-bin/show_pathway?ko00561+K01080
O14495	K01080	PLPP1_2_3	phosphatidate phosphatase [EC:3.1.3.4]	ko00564	Glycerophospholipid metabolism	http://www.kegg.jp/kegg-bin/show_pathway?ko00564+K01080
O14495	K01080	PLPP1_2_3	phosphatidate phosphatase [EC:3.1.3.4]	ko00565	Ether lipid metabolism	http://www.kegg.jp/kegg-bin/show_pathway?ko00565+K01080
O14495	K01080	PLPP1_2_3	phosphatidate phosphatase [EC:3.1.3.4]	ko00600	Sphingolipid metabolism	http://www.kegg.jp/kegg-bin/show_pathway?ko00600+K01080
O14495	K01080	PLPP1_2_3	phosphatidate phosphatase [EC:3.1.3.4]	ko01100	Metabolic pathways	http://www.kegg.jp/kegg-bin/show_pathway?ko01100+K01080
O14495	K01080	PLPP1_2_3	phosphatidate phosphatase [EC:3.1.3.4]	ko01110	Biosynthesis of secondary metabolites	http://www.kegg.jp/kegg-bin/show_pathway?ko01110+K01080
O14495	K01080	PLPP1_2_3	phosphatidate phosphatase [EC:3.1.3.4]	ko04072	Phospholipase D signaling pathway	http://www.kegg.jp/kegg-bin/show_pathway?ko04072+K01080
O14495	K01080	PLPP1_2_3	phosphatidate phosphatase [EC:3.1.3.4]	ko04666	Fc gamma R-mediated phagocytosis	http://www.kegg.jp/kegg-bin/show_pathway?ko04666+K01080
O14495	K01080	PLPP1_2_3	phosphatidate phosphatase [EC:3.1.3.4]	ko04975	Fat digestion and absorption	http://www.kegg.jp/kegg-bin/show_pathway?ko04975+K01080
O14495	K01080	PLPP1_2_3	phosphatidate phosphatase [EC:3.1.3.4]	ko05231	Choline metabolism in cancer	http://www.kegg.jp/kegg-bin/show_pathway?ko05231+K01080
P04179	K04564	SOD2	superoxide dismutase, Fe-Mn family [EC:1.15.1.1]	ko04013	MAPK signaling pathway - fly	http://www.kegg.jp/kegg-bin/show_pathway?ko04013+K04564
P04179	K04564	SOD2	superoxide dismutase, Fe-Mn family [EC:1.15.1.1]	ko04068	FoxO signaling pathway	http://www.kegg.jp/kegg-bin/show_pathway?ko04068+K04564
P04179	K04564	SOD2	superoxide dismutase, Fe-Mn family [EC:1.15.1.1]	ko04146	Peroxisome	http://www.kegg.jp/kegg-bin/show_pathway?ko04146+K04564
P04179	K04564	SOD2	superoxide dismutase, Fe-Mn family [EC:1.15.1.1]	ko04211	Longevity regulating pathway	http://www.kegg.jp/kegg-bin/show_pathway?ko04211+K04564
P04179	K04564	SOD2	superoxide dismutase, Fe-Mn family [EC:1.15.1.1]	ko04212	Longevity regulating pathway - worm	http://www.kegg.jp/kegg-bin/show_pathway?ko04212+K04564
P04179	K04564	SOD2	superoxide dismutase, Fe-Mn family [EC:1.15.1.1]	ko04213	Longevity regulating pathway - multiple species	http://www.kegg.jp/kegg-bin/show_pathway?ko04213+K04564
P04179	K04564	SOD2	superoxide dismutase, Fe-Mn family [EC:1.15.1.1]	ko05016	Huntington disease	http://www.kegg.jp/kegg-bin/show_pathway?ko05016+K04564
O95832	K06087	CLDN	claudin	ko04514	Cell adhesion molecules (CAMs)	http://www.kegg.jp/kegg-bin/show_pathway?ko04514+K06087
O95832	K06087	CLDN	claudin	ko04530	Tight junction	http://www.kegg.jp/kegg-bin/show_pathway?ko04530+K06087
O95832	K06087	CLDN	claudin	ko04670	Leukocyte transendothelial migration	http://www.kegg.jp/kegg-bin/show_pathway?ko04670+K06087
O95832	K06087	CLDN	claudin	ko05130	Pathogenic Escherichia coli infection	http://www.kegg.jp/kegg-bin/show_pathway?ko05130+K06087
O95832	K06087	CLDN	claudin	ko05160	Hepatitis C	http://www.kegg.jp/kegg-bin/show_pathway?ko05160+K06087
P30530	K05115	AXL, UFO	AXL receptor tyrosine kinase [EC:2.7.10.1]	ko01521	EGFR tyrosine kinase inhibitor resistance	http://www.kegg.jp/kegg-bin/show_pathway?ko01521+K05115
Q13885	K07375	TUBB	tubulin beta	ko04145	Phagosome	http://www.kegg.jp/kegg-bin/show_pathway?ko04145+K07375
Q13885	K07375	TUBB	tubulin beta	ko04540	Gap junction	http://www.kegg.jp/kegg-bin/show_pathway?ko04540+K07375
Q13885	K07375	TUBB	tubulin beta	ko05010	Alzheimer disease	http://www.kegg.jp/kegg-bin/show_pathway?ko05010+K07375
Q13885	K07375	TUBB	tubulin beta	ko05016	Huntington disease	http://www.kegg.jp/kegg-bin/show_pathway?ko05016+K07375
Q13885	K07375	TUBB	tubulin beta	ko05130	Pathogenic Escherichia coli infection	http://www.kegg.jp/kegg-bin/show_pathway?ko05130+K07375
Q99942	K10666	RNF5	E3 ubiquitin-protein ligase RNF5 [EC:2.3.2.27]	ko04141	Protein processing in endoplasmic reticulum	http://www.kegg.jp/kegg-bin/show_pathway?ko04141+K10666
Q96HE7	K10950	ERO1L	ERO1-like protein alpha [EC:1.8.4.-]	ko04141	Protein processing in endoplasmic reticulum	http://www.kegg.jp/kegg-bin/show_pathway?ko04141+K10950
Q96HE7	K10950	ERO1L	ERO1-like protein alpha [EC:1.8.4.-]	ko05110	Vibrio cholerae infection	http://www.kegg.jp/kegg-bin/show_pathway?ko05110+K10950
Q9NXK6
P11234	K07835	RALB	Ras-related protein Ral-B	ko04014	Ras signaling pathway	http://www.kegg.jp/kegg-bin/show_pathway?ko04014+K07835
P11234	K07835	RALB	Ras-related protein Ral-B	ko04015	Rap1 signaling pathway	http://www.kegg.jp/kegg-bin/show_pathway?ko04015+K07835
P11234	K07835	RALB	Ras-related protein Ral-B	ko04072	Phospholipase D signaling pathway	http://www.kegg.jp/kegg-bin/show_pathway?ko04072+K07835
P11234	K07835	RALB	Ras-related protein Ral-B	ko05200	Pathways in cancer	http://www.kegg.jp/kegg-bin/show_pathway?ko05200+K07835
P11234	K07835	RALB	Ras-related protein Ral-B	ko05210	Colorectal cancer	http://www.kegg.jp/kegg-bin/show_pathway?ko05210+K07835
P11234	K07835	RALB	Ras-related protein Ral-B	ko05212	Pancreatic cancer	http://www.kegg.jp/kegg-bin/show_pathway?ko05212+K07835
P01584	K04519	IL1B	interleukin 1 beta	ko01523	Antifolate resistance	http://www.kegg.jp/kegg-bin/show_pathway?ko01523+K04519
P01584	K04519	IL1B	interleukin 1 beta	ko04010	MAPK signaling pathway	http://www.kegg.jp/kegg-bin/show_pathway?ko04010+K04519
P01584	K04519	IL1B	interleukin 1 beta	ko04060	Cytokine-cytokine receptor interaction	http://www.kegg.jp/kegg-bin/show_pathway?ko04060+K04519
P01584	K04519	IL1B	interleukin 1 beta	ko04064	NF-kappa B signaling pathway	http://www.kegg.jp/kegg-bin/show_pathway?ko04064+K04519
P01584	K04519	IL1B	interleukin 1 beta	ko04217	Necroptosis	http://www.kegg.jp/kegg-bin/show_pathway?ko04217+K04519
P01584	K04519	IL1B	interleukin 1 beta	ko04380	Osteoclast differentiation	http://www.kegg.jp/kegg-bin/show_pathway?ko04380+K04519
P01584	K04519	IL1B	interleukin 1 beta	ko04620	Toll-like receptor signaling pathway	http://www.kegg.jp/kegg-bin/show_pathway?ko04620+K04519
P01584	K04519	IL1B	interleukin 1 beta	ko04621	NOD-like receptor signaling pathway	http://www.kegg.jp/kegg-bin/show_pathway?ko04621+K04519
P01584	K04519	IL1B	interleukin 1 beta	ko04623	Cytosolic DNA-sensing pathway	http://www.kegg.jp/kegg-bin/show_pathway?ko04623+K04519
P01584	K04519	IL1B	interleukin 1 beta	ko04625	C-type lectin receptor signaling pathway	http://www.kegg.jp/kegg-bin/show_pathway?ko04625+K04519
P01584	K04519	IL1B	interleukin 1 beta	ko04640	Hematopoietic cell lineage	http://www.kegg.jp/kegg-bin/show_pathway?ko04640+K04519
P01584	K04519	IL1B	interleukin 1 beta	ko04657	IL-17 signaling pathway	http://www.kegg.jp/kegg-bin/show_pathway?ko04657+K04519
P01584	K04519	IL1B	interleukin 1 beta	ko04659	Th17 cell differentiation	http://www.kegg.jp/kegg-bin/show_pathway?ko04659+K04519
P01584	K04519	IL1B	interleukin 1 beta	ko04668	TNF signaling pathway	http://www.kegg.jp/kegg-bin/show_pathway?ko04668+K04519
P01584	K04519	IL1B	interleukin 1 beta	ko04750	Inflammatory mediator regulation of TRP channels	http://www.kegg.jp/kegg-bin/show_pathway?ko04750+K04519
P01584	K04519	IL1B	interleukin 1 beta	ko04932	Non-alcoholic fatty liver disease (NAFLD)	http://www.kegg.jp/kegg-bin/show_pathway?ko04932+K04519
P01584	K04519	IL1B	interleukin 1 beta	ko04933	AGE-RAGE signaling pathway in diabetic complications	http://www.kegg.jp/kegg-bin/show_pathway?ko04933+K04519
P01584	K04519	IL1B	interleukin 1 beta	ko04940	Type I diabetes mellitus	http://www.kegg.jp/kegg-bin/show_pathway?ko04940+K04519
P01584	K04519	IL1B	interleukin 1 beta	ko05010	Alzheimer disease	http://www.kegg.jp/kegg-bin/show_pathway?ko05010+K04519
P01584	K04519	IL1B	interleukin 1 beta	ko05020	Prion diseases	http://www.kegg.jp/kegg-bin/show_pathway?ko05020+K04519
P01584	K04519	IL1B	interleukin 1 beta	ko05130	Pathogenic Escherichia coli infection	http://www.kegg.jp/kegg-bin/show_pathway?ko05130+K04519
P01584	K04519	IL1B	interleukin 1 beta	ko05131	Shigellosis	http://www.kegg.jp/kegg-bin/show_pathway?ko05131+K04519
P01584	K04519	IL1B	interleukin 1 beta	ko05132	Salmonella infection	http://www.kegg.jp/kegg-bin/show_pathway?ko05132+K04519
P01584	K04519	IL1B	interleukin 1 beta	ko05133	Pertussis	http://www.kegg.jp/kegg-bin/show_pathway?ko05133+K04519
P01584	K04519	IL1B	interleukin 1 beta	ko05134	Legionellosis	http://www.kegg.jp/kegg-bin/show_pathway?ko05134+K04519
P01584	K04519	IL1B	interleukin 1 beta	ko05135	Yersinia infection	http://www.kegg.jp/kegg-bin/show_pathway?ko05135+K04519
P01584	K04519	IL1B	interleukin 1 beta	ko05140	Leishmaniasis	http://www.kegg.jp/kegg-bin/show_pathway?ko05140+K04519
P01584	K04519	IL1B	interleukin 1 beta	ko05142	Chagas disease (American trypanosomiasis)	http://www.kegg.jp/kegg-bin/show_pathway?ko05142+K04519
P01584	K04519	IL1B	interleukin 1 beta	ko05143	African trypanosomiasis	http://www.kegg.jp/kegg-bin/show_pathway?ko05143+K04519
P01584	K04519	IL1B	interleukin 1 beta	ko05144	Malaria	http://www.kegg.jp/kegg-bin/show_pathway?ko05144+K04519
P01584	K04519	IL1B	interleukin 1 beta	ko05146	Amoebiasis	http://www.kegg.jp/kegg-bin/show_pathway?ko05146+K04519
P01584	K04519	IL1B	interleukin 1 beta	ko05152	Tuberculosis	http://www.kegg.jp/kegg-bin/show_pathway?ko05152+K04519
P01584	K04519	IL1B	interleukin 1 beta	ko05162	Measles	http://www.kegg.jp/kegg-bin/show_pathway?ko05162+K04519
P01584	K04519	IL1B	interleukin 1 beta	ko05163	Human cytomegalovirus infection	http://www.kegg.jp/kegg-bin/show_pathway?ko05163+K04519
P01584	K04519	IL1B	interleukin 1 beta	ko05164	Influenza A	http://www.kegg.jp/kegg-bin/show_pathway?ko05164+K04519
P01584	K04519	IL1B	interleukin 1 beta	ko05168	Herpes simplex virus 1 infection	http://www.kegg.jp/kegg-bin/show_pathway?ko05168+K04519
P01584	K04519	IL1B	interleukin 1 beta	ko05321	Inflammatory bowel disease (IBD)	http://www.kegg.jp/kegg-bin/show_pathway?ko05321+K04519
P01584	K04519	IL1B	interleukin 1 beta	ko05323	Rheumatoid arthritis	http://www.kegg.jp/kegg-bin/show_pathway?ko05323+K04519
P01584	K04519	IL1B	interleukin 1 beta	ko05332	Graft-versus-host disease	http://www.kegg.jp/kegg-bin/show_pathway?ko05332+K04519
P01584	K04519	IL1B	interleukin 1 beta	ko05418	Fluid shear stress and atherosclerosis	http://www.kegg.jp/kegg-bin/show_pathway?ko05418+K04519
Q9C002
Q8NDC0
P23921	K10807	RRM1	ribonucleoside-diphosphate reductase subunit M1 [EC:1.17.4.1]	ko00230	Purine metabolism	http://www.kegg.jp/kegg-bin/show_pathway?ko00230+K10807
P23921	K10807	RRM1	ribonucleoside-diphosphate reductase subunit M1 [EC:1.17.4.1]	ko00240	Pyrimidine metabolism	http://www.kegg.jp/kegg-bin/show_pathway?ko00240+K10807
P23921	K10807	RRM1	ribonucleoside-diphosphate reductase subunit M1 [EC:1.17.4.1]	ko00480	Glutathione metabolism	http://www.kegg.jp/kegg-bin/show_pathway?ko00480+K10807
P23921	K10807	RRM1	ribonucleoside-diphosphate reductase subunit M1 [EC:1.17.4.1]	ko00983	Drug metabolism - other enzymes	http://www.kegg.jp/kegg-bin/show_pathway?ko00983+K10807
P23921	K10807	RRM1	ribonucleoside-diphosphate reductase subunit M1 [EC:1.17.4.1]	ko01100	Metabolic pathways	http://www.kegg.jp/kegg-bin/show_pathway?ko01100+K10807
Q6P9B6
Q9BXN6
Q6JBY9	K18615	RCSD1, CAPZIP	CapZ-interacting protein
Q01432	K01490	AMPD	AMP deaminase [EC:3.5.4.6]	ko00230	Purine metabolism	http://www.kegg.jp/kegg-bin/show_pathway?ko00230+K01490
Q01432	K01490	AMPD	AMP deaminase [EC:3.5.4.6]	ko01100	Metabolic pathways	http://www.kegg.jp/kegg-bin/show_pathway?ko01100+K01490
Q01432	K01490	AMPD	AMP deaminase [EC:3.5.4.6]	ko01110	Biosynthesis of secondary metabolites	http://www.kegg.jp/kegg-bin/show_pathway?ko01110+K01490
P28288	K05677	ABCD3, PMP70	ATP-binding cassette, subfamily D (ALD), member 3	ko02010	ABC transporters	http://www.kegg.jp/kegg-bin/show_pathway?ko02010+K05677
P28288	K05677	ABCD3, PMP70	ATP-binding cassette, subfamily D (ALD), member 3	ko04146	Peroxisome	http://www.kegg.jp/kegg-bin/show_pathway?ko04146+K05677
O75976	K07752	CPD	carboxypeptidase D [EC:3.4.17.22]
P07858	K01363	CTSB	cathepsin B [EC:3.4.22.1]	ko04140	Autophagy - animal	http://www.kegg.jp/kegg-bin/show_pathway?ko04140+K01363
P07858	K01363	CTSB	cathepsin B [EC:3.4.22.1]	ko04142	Lysosome	http://www.kegg.jp/kegg-bin/show_pathway?ko04142+K01363
P07858	K01363	CTSB	cathepsin B [EC:3.4.22.1]	ko04210	Apoptosis	http://www.kegg.jp/kegg-bin/show_pathway?ko04210+K01363
P07858	K01363	CTSB	cathepsin B [EC:3.4.22.1]	ko04612	Antigen processing and presentation	http://www.kegg.jp/kegg-bin/show_pathway?ko04612+K01363
P07858	K01363	CTSB	cathepsin B [EC:3.4.22.1]	ko04621	NOD-like receptor signaling pathway	http://www.kegg.jp/kegg-bin/show_pathway?ko04621+K01363
P07858	K01363	CTSB	cathepsin B [EC:3.4.22.1]	ko04924	Renin secretion	http://www.kegg.jp/kegg-bin/show_pathway?ko04924+K01363
Q9Y5U9	K22939	IER3IP1, YOS1	immediate early response 3-interacting protein 1
Q9Y673	K00729	ALG5	dolichyl-phosphate beta-glucosyltransferase [EC:2.4.1.117]	ko00510	N-Glycan biosynthesis	http://www.kegg.jp/kegg-bin/show_pathway?ko00510+K00729
Q9Y673	K00729	ALG5	dolichyl-phosphate beta-glucosyltransferase [EC:2.4.1.117]	ko01100	Metabolic pathways	http://www.kegg.jp/kegg-bin/show_pathway?ko01100+K00729
Q07954	K04550	LRP1, CD91	low-density lipoprotein receptor-related protein 1 (alpha-2-macroglobulin receptor)	ko04979	Cholesterol metabolism	http://www.kegg.jp/kegg-bin/show_pathway?ko04979+K04550
Q07954	K04550	LRP1, CD91	low-density lipoprotein receptor-related protein 1 (alpha-2-macroglobulin receptor)	ko05010	Alzheimer disease	http://www.kegg.jp/kegg-bin/show_pathway?ko05010+K04550
Q07954	K04550	LRP1, CD91	low-density lipoprotein receptor-related protein 1 (alpha-2-macroglobulin receptor)	ko05144	Malaria	http://www.kegg.jp/kegg-bin/show_pathway?ko05144+K04550
Q6PI78
P80297	K14739	MT1_2	metallothionein 1/2	ko04212	Longevity regulating pathway - worm	http://www.kegg.jp/kegg-bin/show_pathway?ko04212+K14739
P80297	K14739	MT1_2	metallothionein 1/2	ko04978	Mineral absorption	http://www.kegg.jp/kegg-bin/show_pathway?ko04978+K14739
O60711
Q9UI42	K08637	CPA4	carboxypeptidase A4 [EC:3.4.17.-]
Q14116	K05482	IL18, IL1F4	interleukin 18	ko04060	Cytokine-cytokine receptor interaction	http://www.kegg.jp/kegg-bin/show_pathway?ko04060+K05482
Q14116	K05482	IL18, IL1F4	interleukin 18	ko04061	Viral protein interaction with cytokine and cytokine receptor	http://www.kegg.jp/kegg-bin/show_pathway?ko04061+K05482
Q14116	K05482	IL18, IL1F4	interleukin 18	ko04621	NOD-like receptor signaling pathway	http://www.kegg.jp/kegg-bin/show_pathway?ko04621+K05482
Q14116	K05482	IL18, IL1F4	interleukin 18	ko04623	Cytosolic DNA-sensing pathway	http://www.kegg.jp/kegg-bin/show_pathway?ko04623+K05482
Q14116	K05482	IL18, IL1F4	interleukin 18	ko05130	Pathogenic Escherichia coli infection	http://www.kegg.jp/kegg-bin/show_pathway?ko05130+K05482
Q14116	K05482	IL18, IL1F4	interleukin 18	ko05131	Shigellosis	http://www.kegg.jp/kegg-bin/show_pathway?ko05131+K05482
Q14116	K05482	IL18, IL1F4	interleukin 18	ko05132	Salmonella infection	http://www.kegg.jp/kegg-bin/show_pathway?ko05132+K05482
Q14116	K05482	IL18, IL1F4	interleukin 18	ko05134	Legionellosis	http://www.kegg.jp/kegg-bin/show_pathway?ko05134+K05482
Q14116	K05482	IL18, IL1F4	interleukin 18	ko05135	Yersinia infection	http://www.kegg.jp/kegg-bin/show_pathway?ko05135+K05482
Q14116	K05482	IL18, IL1F4	interleukin 18	ko05143	African trypanosomiasis	http://www.kegg.jp/kegg-bin/show_pathway?ko05143+K05482
Q14116	K05482	IL18, IL1F4	interleukin 18	ko05144	Malaria	http://www.kegg.jp/kegg-bin/show_pathway?ko05144+K05482
Q14116	K05482	IL18, IL1F4	interleukin 18	ko05152	Tuberculosis	http://www.kegg.jp/kegg-bin/show_pathway?ko05152+K05482
Q14116	K05482	IL18, IL1F4	interleukin 18	ko05164	Influenza A	http://www.kegg.jp/kegg-bin/show_pathway?ko05164+K05482
Q14116	K05482	IL18, IL1F4	interleukin 18	ko05321	Inflammatory bowel disease (IBD)	http://www.kegg.jp/kegg-bin/show_pathway?ko05321+K05482
Q14116	K05482	IL18, IL1F4	interleukin 18	ko05323	Rheumatoid arthritis	http://www.kegg.jp/kegg-bin/show_pathway?ko05323+K05482
Q6PCE3	K11809	PGM2L1	glucose-1,6-bisphosphate synthase [EC:2.7.1.106]	ko00500	Starch and sucrose metabolism	http://www.kegg.jp/kegg-bin/show_pathway?ko00500+K11809
Q6PCE3	K11809	PGM2L1	glucose-1,6-bisphosphate synthase [EC:2.7.1.106]	ko01100	Metabolic pathways	http://www.kegg.jp/kegg-bin/show_pathway?ko01100+K11809
Q6UXH1
P09382	K06830	LGALS1	galectin-1
O15321	K17085	TM9SF1	transmembrane 9 superfamily member 1
P17301	K06481	ITGA2, CD49b	integrin alpha 2	ko04145	Phagosome	http://www.kegg.jp/kegg-bin/show_pathway?ko04145+K06481
P17301	K06481	ITGA2, CD49b	integrin alpha 2	ko04151	PI3K-Akt signaling pathway	http://www.kegg.jp/kegg-bin/show_pathway?ko04151+K06481
P17301	K06481	ITGA2, CD49b	integrin alpha 2	ko04510	Focal adhesion	http://www.kegg.jp/kegg-bin/show_pathway?ko04510+K06481
P17301	K06481	ITGA2, CD49b	integrin alpha 2	ko04512	ECM-receptor interaction	http://www.kegg.jp/kegg-bin/show_pathway?ko04512+K06481
P17301	K06481	ITGA2, CD49b	integrin alpha 2	ko04611	Platelet activation	http://www.kegg.jp/kegg-bin/show_pathway?ko04611+K06481
P17301	K06481	ITGA2, CD49b	integrin alpha 2	ko04640	Hematopoietic cell lineage	http://www.kegg.jp/kegg-bin/show_pathway?ko04640+K06481
P17301	K06481	ITGA2, CD49b	integrin alpha 2	ko04810	Regulation of actin cytoskeleton	http://www.kegg.jp/kegg-bin/show_pathway?ko04810+K06481
P17301	K06481	ITGA2, CD49b	integrin alpha 2	ko05165	Human papillomavirus infection	http://www.kegg.jp/kegg-bin/show_pathway?ko05165+K06481
P17301	K06481	ITGA2, CD49b	integrin alpha 2	ko05200	Pathways in cancer	http://www.kegg.jp/kegg-bin/show_pathway?ko05200+K06481
P17301	K06481	ITGA2, CD49b	integrin alpha 2	ko05205	Proteoglycans in cancer	http://www.kegg.jp/kegg-bin/show_pathway?ko05205+K06481
P17301	K06481	ITGA2, CD49b	integrin alpha 2	ko05222	Small cell lung cancer	http://www.kegg.jp/kegg-bin/show_pathway?ko05222+K06481
P17301	K06481	ITGA2, CD49b	integrin alpha 2	ko05410	Hypertrophic cardiomyopathy (HCM)	http://www.kegg.jp/kegg-bin/show_pathway?ko05410+K06481
P17301	K06481	ITGA2, CD49b	integrin alpha 2	ko05412	Arrhythmogenic right ventricular cardiomyopathy (ARVC)	http://www.kegg.jp/kegg-bin/show_pathway?ko05412+K06481
P17301	K06481	ITGA2, CD49b	integrin alpha 2	ko05414	Dilated cardiomyopathy (DCM)	http://www.kegg.jp/kegg-bin/show_pathway?ko05414+K06481
O95810
Q5SZL2	K16766	CEP85	centrosomal protein CEP85
P48060
P63313	K13785	TMSB10	thymosin beta 10
Q9UKV8	K11593	ELF2C, AGO	eukaryotic translation initiation factor 2C	ko04361	Axon regeneration	http://www.kegg.jp/kegg-bin/show_pathway?ko04361+K11593
Q4G0X4	K21922	KCTD21	BTB/POZ domain-containing protein KCTD21
Q9UM22
O43493
Q5JS37
P15509	K05066	CSF2RA, GMCSFR, CD116	granulocyte-macrophage colony-stimulating factor receptor alpha	ko04060	Cytokine-cytokine receptor interaction	http://www.kegg.jp/kegg-bin/show_pathway?ko04060+K05066
P15509	K05066	CSF2RA, GMCSFR, CD116	granulocyte-macrophage colony-stimulating factor receptor alpha	ko04630	JAK-STAT signaling pathway	http://www.kegg.jp/kegg-bin/show_pathway?ko04630+K05066
P15509	K05066	CSF2RA, GMCSFR, CD116	granulocyte-macrophage colony-stimulating factor receptor alpha	ko04640	Hematopoietic cell lineage	http://www.kegg.jp/kegg-bin/show_pathway?ko04640+K05066
P15509	K05066	CSF2RA, GMCSFR, CD116	granulocyte-macrophage colony-stimulating factor receptor alpha	ko05200	Pathways in cancer	http://www.kegg.jp/kegg-bin/show_pathway?ko05200+K05066
Q2TB90	K00844	HK	hexokinase [EC:2.7.1.1]	ko00010	Glycolysis / Gluconeogenesis	http://www.kegg.jp/kegg-bin/show_pathway?ko00010+K00844
Q2TB90	K00844	HK	hexokinase [EC:2.7.1.1]	ko00051	Fructose and mannose metabolism	http://www.kegg.jp/kegg-bin/show_pathway?ko00051+K00844
Q2TB90	K00844	HK	hexokinase [EC:2.7.1.1]	ko00052	Galactose metabolism	http://www.kegg.jp/kegg-bin/show_pathway?ko00052+K00844
Q2TB90	K00844	HK	hexokinase [EC:2.7.1.1]	ko00500	Starch and sucrose metabolism	http://www.kegg.jp/kegg-bin/show_pathway?ko00500+K00844
Q2TB90	K00844	HK	hexokinase [EC:2.7.1.1]	ko00520	Amino sugar and nucleotide sugar metabolism	http://www.kegg.jp/kegg-bin/show_pathway?ko00520+K00844
Q2TB90	K00844	HK	hexokinase [EC:2.7.1.1]	ko00521	Streptomycin biosynthesis	http://www.kegg.jp/kegg-bin/show_pathway?ko00521+K00844
Q2TB90	K00844	HK	hexokinase [EC:2.7.1.1]	ko00524	Neomycin, kanamycin and gentamicin biosynthesis	http://www.kegg.jp/kegg-bin/show_pathway?ko00524+K00844
Q2TB90	K00844	HK	hexokinase [EC:2.7.1.1]	ko01100	Metabolic pathways	http://www.kegg.jp/kegg-bin/show_pathway?ko01100+K00844
Q2TB90	K00844	HK	hexokinase [EC:2.7.1.1]	ko01110	Biosynthesis of secondary metabolites	http://www.kegg.jp/kegg-bin/show_pathway?ko01110+K00844
Q2TB90	K00844	HK	hexokinase [EC:2.7.1.1]	ko01120	Microbial metabolism in diverse environments	http://www.kegg.jp/kegg-bin/show_pathway?ko01120+K00844
Q2TB90	K00844	HK	hexokinase [EC:2.7.1.1]	ko01200	Carbon metabolism	http://www.kegg.jp/kegg-bin/show_pathway?ko01200+K00844
Q2TB90	K00844	HK	hexokinase [EC:2.7.1.1]	ko04066	HIF-1 signaling pathway	http://www.kegg.jp/kegg-bin/show_pathway?ko04066+K00844
Q2TB90	K00844	HK	hexokinase [EC:2.7.1.1]	ko04910	Insulin signaling pathway	http://www.kegg.jp/kegg-bin/show_pathway?ko04910+K00844
Q2TB90	K00844	HK	hexokinase [EC:2.7.1.1]	ko04930	Type II diabetes mellitus	http://www.kegg.jp/kegg-bin/show_pathway?ko04930+K00844
Q2TB90	K00844	HK	hexokinase [EC:2.7.1.1]	ko04973	Carbohydrate digestion and absorption	http://www.kegg.jp/kegg-bin/show_pathway?ko04973+K00844
Q2TB90	K00844	HK	hexokinase [EC:2.7.1.1]	ko05131	Shigellosis	http://www.kegg.jp/kegg-bin/show_pathway?ko05131+K00844
Q2TB90	K00844	HK	hexokinase [EC:2.7.1.1]	ko05230	Central carbon metabolism in cancer	http://www.kegg.jp/kegg-bin/show_pathway?ko05230+K00844
P49662	K04394	CASP4, CASP11	caspase 4 [EC:3.4.22.57 3.4.22.64]	ko04621	NOD-like receptor signaling pathway	http://www.kegg.jp/kegg-bin/show_pathway?ko04621+K04394
P49662	K04394	CASP4, CASP11	caspase 4 [EC:3.4.22.57 3.4.22.64]	ko05130	Pathogenic Escherichia coli infection	http://www.kegg.jp/kegg-bin/show_pathway?ko05130+K04394
P49662	K04394	CASP4, CASP11	caspase 4 [EC:3.4.22.57 3.4.22.64]	ko05131	Shigellosis	http://www.kegg.jp/kegg-bin/show_pathway?ko05131+K04394
P49662	K04394	CASP4, CASP11	caspase 4 [EC:3.4.22.57 3.4.22.64]	ko05132	Salmonella infection	http://www.kegg.jp/kegg-bin/show_pathway?ko05132+K04394
O14832	K00477	PHYH	phytanoyl-CoA hydroxylase [EC:1.14.11.18]	ko04146	Peroxisome	http://www.kegg.jp/kegg-bin/show_pathway?ko04146+K00477
P00749	K01348	PLAU	urokinase plasminogen activator [EC:3.4.21.73]	ko04064	NF-kappa B signaling pathway	http://www.kegg.jp/kegg-bin/show_pathway?ko04064+K01348
P00749	K01348	PLAU	urokinase plasminogen activator [EC:3.4.21.73]	ko04610	Complement and coagulation cascades	http://www.kegg.jp/kegg-bin/show_pathway?ko04610+K01348
P00749	K01348	PLAU	urokinase plasminogen activator [EC:3.4.21.73]	ko05202	Transcriptional misregulation in cancer	http://www.kegg.jp/kegg-bin/show_pathway?ko05202+K01348
P00749	K01348	PLAU	urokinase plasminogen activator [EC:3.4.21.73]	ko05205	Proteoglycans in cancer	http://www.kegg.jp/kegg-bin/show_pathway?ko05205+K01348
P00749	K01348	PLAU	urokinase plasminogen activator [EC:3.4.21.73]	ko05206	MicroRNAs in cancer	http://www.kegg.jp/kegg-bin/show_pathway?ko05206+K01348
P00749	K01348	PLAU	urokinase plasminogen activator [EC:3.4.21.73]	ko05215	Prostate cancer	http://www.kegg.jp/kegg-bin/show_pathway?ko05215+K01348
P20908	K19721	COL5AS	collagen, type V/XI/XXIV/XXVII, alpha	ko04974	Protein digestion and absorption	http://www.kegg.jp/kegg-bin/show_pathway?ko04974+K19721
Q14764	K17266	MVP	major vault protein
P43121	K06534	MCAM, CD146	melanoma cell adhesion molecule
P52823
O95833	K05023	CLIC3	chloride intracellular channel protein 3
Q9NUD5
O95873
Q13751	K06244	LAMB3	laminin, beta 3	ko04151	PI3K-Akt signaling pathway	http://www.kegg.jp/kegg-bin/show_pathway?ko04151+K06244
Q13751	K06244	LAMB3	laminin, beta 3	ko04510	Focal adhesion	http://www.kegg.jp/kegg-bin/show_pathway?ko04510+K06244
Q13751	K06244	LAMB3	laminin, beta 3	ko04512	ECM-receptor interaction	http://www.kegg.jp/kegg-bin/show_pathway?ko04512+K06244
Q13751	K06244	LAMB3	laminin, beta 3	ko05145	Toxoplasmosis	http://www.kegg.jp/kegg-bin/show_pathway?ko05145+K06244
Q13751	K06244	LAMB3	laminin, beta 3	ko05146	Amoebiasis	http://www.kegg.jp/kegg-bin/show_pathway?ko05146+K06244
Q13751	K06244	LAMB3	laminin, beta 3	ko05165	Human papillomavirus infection	http://www.kegg.jp/kegg-bin/show_pathway?ko05165+K06244
Q13751	K06244	LAMB3	laminin, beta 3	ko05200	Pathways in cancer	http://www.kegg.jp/kegg-bin/show_pathway?ko05200+K06244
Q13751	K06244	LAMB3	laminin, beta 3	ko05222	Small cell lung cancer	http://www.kegg.jp/kegg-bin/show_pathway?ko05222+K06244
Q7Z7K0	K18171	CMC1	COX assembly mitochondrial protein 1
Q9BWH2
P05362	K06490	ICAM1, CD54	intercellular adhesion molecule 1	ko04064	NF-kappa B signaling pathway	http://www.kegg.jp/kegg-bin/show_pathway?ko04064+K06490
P05362	K06490	ICAM1, CD54	intercellular adhesion molecule 1	ko04514	Cell adhesion molecules (CAMs)	http://www.kegg.jp/kegg-bin/show_pathway?ko04514+K06490
P05362	K06490	ICAM1, CD54	intercellular adhesion molecule 1	ko04650	Natural killer cell mediated cytotoxicity	http://www.kegg.jp/kegg-bin/show_pathway?ko04650+K06490
P05362	K06490	ICAM1, CD54	intercellular adhesion molecule 1	ko04668	TNF signaling pathway	http://www.kegg.jp/kegg-bin/show_pathway?ko04668+K06490
P05362	K06490	ICAM1, CD54	intercellular adhesion molecule 1	ko04670	Leukocyte transendothelial migration	http://www.kegg.jp/kegg-bin/show_pathway?ko04670+K06490
P05362	K06490	ICAM1, CD54	intercellular adhesion molecule 1	ko04933	AGE-RAGE signaling pathway in diabetic complications	http://www.kegg.jp/kegg-bin/show_pathway?ko04933+K06490
P05362	K06490	ICAM1, CD54	intercellular adhesion molecule 1	ko05143	African trypanosomiasis	http://www.kegg.jp/kegg-bin/show_pathway?ko05143+K06490
P05362	K06490	ICAM1, CD54	intercellular adhesion molecule 1	ko05144	Malaria	http://www.kegg.jp/kegg-bin/show_pathway?ko05144+K06490
P05362	K06490	ICAM1, CD54	intercellular adhesion molecule 1	ko05150	Staphylococcus aureus infection	http://www.kegg.jp/kegg-bin/show_pathway?ko05150+K06490
P05362	K06490	ICAM1, CD54	intercellular adhesion molecule 1	ko05164	Influenza A	http://www.kegg.jp/kegg-bin/show_pathway?ko05164+K06490
P05362	K06490	ICAM1, CD54	intercellular adhesion molecule 1	ko05166	Human T-cell leukemia virus 1 infection	http://www.kegg.jp/kegg-bin/show_pathway?ko05166+K06490
P05362	K06490	ICAM1, CD54	intercellular adhesion molecule 1	ko05167	Kaposi sarcoma-associated herpesvirus infection	http://www.kegg.jp/kegg-bin/show_pathway?ko05167+K06490
P05362	K06490	ICAM1, CD54	intercellular adhesion molecule 1	ko05169	Epstein-Barr virus infection	http://www.kegg.jp/kegg-bin/show_pathway?ko05169+K06490
P05362	K06490	ICAM1, CD54	intercellular adhesion molecule 1	ko05323	Rheumatoid arthritis	http://www.kegg.jp/kegg-bin/show_pathway?ko05323+K06490
P05362	K06490	ICAM1, CD54	intercellular adhesion molecule 1	ko05416	Viral myocarditis	http://www.kegg.jp/kegg-bin/show_pathway?ko05416+K06490
P05362	K06490	ICAM1, CD54	intercellular adhesion molecule 1	ko05418	Fluid shear stress and atherosclerosis	http://www.kegg.jp/kegg-bin/show_pathway?ko05418+K06490
Q92805	K16731	GOLGA1	golgin subfamily A member 1
P08183	K05658	ABCB1, CD243	ATP-binding cassette, subfamily B (MDR/TAP), member 1 [EC:7.6.2.2]	ko02010	ABC transporters	http://www.kegg.jp/kegg-bin/show_pathway?ko02010+K05658
P08183	K05658	ABCB1, CD243	ATP-binding cassette, subfamily B (MDR/TAP), member 1 [EC:7.6.2.2]	ko04976	Bile secretion	http://www.kegg.jp/kegg-bin/show_pathway?ko04976+K05658
P08183	K05658	ABCB1, CD243	ATP-binding cassette, subfamily B (MDR/TAP), member 1 [EC:7.6.2.2]	ko05206	MicroRNAs in cancer	http://www.kegg.jp/kegg-bin/show_pathway?ko05206+K05658
P08183	K05658	ABCB1, CD243	ATP-binding cassette, subfamily B (MDR/TAP), member 1 [EC:7.6.2.2]	ko05226	Gastric cancer	http://www.kegg.jp/kegg-bin/show_pathway?ko05226+K05658
Q16610	K23867	ECM1	extracellular matrix protein 1
Q9NX40
P07942	K05636	LAMB1	laminin, beta 1	ko04151	PI3K-Akt signaling pathway	http://www.kegg.jp/kegg-bin/show_pathway?ko04151+K05636
P07942	K05636	LAMB1	laminin, beta 1	ko04510	Focal adhesion	http://www.kegg.jp/kegg-bin/show_pathway?ko04510+K05636
P07942	K05636	LAMB1	laminin, beta 1	ko04512	ECM-receptor interaction	http://www.kegg.jp/kegg-bin/show_pathway?ko04512+K05636
P07942	K05636	LAMB1	laminin, beta 1	ko05145	Toxoplasmosis	http://www.kegg.jp/kegg-bin/show_pathway?ko05145+K05636
P07942	K05636	LAMB1	laminin, beta 1	ko05146	Amoebiasis	http://www.kegg.jp/kegg-bin/show_pathway?ko05146+K05636
P07942	K05636	LAMB1	laminin, beta 1	ko05165	Human papillomavirus infection	http://www.kegg.jp/kegg-bin/show_pathway?ko05165+K05636
P07942	K05636	LAMB1	laminin, beta 1	ko05200	Pathways in cancer	http://www.kegg.jp/kegg-bin/show_pathway?ko05200+K05636
P07942	K05636	LAMB1	laminin, beta 1	ko05222	Small cell lung cancer	http://www.kegg.jp/kegg-bin/show_pathway?ko05222+K05636
Q9Y2Y0	K16742	ARL2BP, BART	ADP-ribosylation factor-like protein 2-binding protein
Q15434
P80303	K20371	NUCB	nucleobindin
O75503	K12390	CLN5	ceroid-lipofuscinosis neuronal protein 5	ko04142	Lysosome	http://www.kegg.jp/kegg-bin/show_pathway?ko04142+K12390
O14933	K04553	UBE2L6, UBCH8	ubiquitin-conjugating enzyme E2 L6 [EC:2.3.2.23]	ko04120	Ubiquitin mediated proteolysis	http://www.kegg.jp/kegg-bin/show_pathway?ko04120+K04553
O14933	K04553	UBE2L6, UBCH8	ubiquitin-conjugating enzyme E2 L6 [EC:2.3.2.23]	ko05012	Parkinson disease	http://www.kegg.jp/kegg-bin/show_pathway?ko05012+K04553
P09104	K01689	ENO, eno	enolase [EC:4.2.1.11]	ko00010	Glycolysis / Gluconeogenesis	http://www.kegg.jp/kegg-bin/show_pathway?ko00010+K01689
P09104	K01689	ENO, eno	enolase [EC:4.2.1.11]	ko00680	Methane metabolism	http://www.kegg.jp/kegg-bin/show_pathway?ko00680+K01689
P09104	K01689	ENO, eno	enolase [EC:4.2.1.11]	ko01100	Metabolic pathways	http://www.kegg.jp/kegg-bin/show_pathway?ko01100+K01689
P09104	K01689	ENO, eno	enolase [EC:4.2.1.11]	ko01110	Biosynthesis of secondary metabolites	http://www.kegg.jp/kegg-bin/show_pathway?ko01110+K01689
P09104	K01689	ENO, eno	enolase [EC:4.2.1.11]	ko01120	Microbial metabolism in diverse environments	http://www.kegg.jp/kegg-bin/show_pathway?ko01120+K01689
P09104	K01689	ENO, eno	enolase [EC:4.2.1.11]	ko01200	Carbon metabolism	http://www.kegg.jp/kegg-bin/show_pathway?ko01200+K01689
P09104	K01689	ENO, eno	enolase [EC:4.2.1.11]	ko01230	Biosynthesis of amino acids	http://www.kegg.jp/kegg-bin/show_pathway?ko01230+K01689
P09104	K01689	ENO, eno	enolase [EC:4.2.1.11]	ko03018	RNA degradation	http://www.kegg.jp/kegg-bin/show_pathway?ko03018+K01689
P09104	K01689	ENO, eno	enolase [EC:4.2.1.11]	ko04066	HIF-1 signaling pathway	http://www.kegg.jp/kegg-bin/show_pathway?ko04066+K01689
P54803	K01202	GALC	galactosylceramidase [EC:3.2.1.46]	ko00600	Sphingolipid metabolism	http://www.kegg.jp/kegg-bin/show_pathway?ko00600+K01202
P54803	K01202	GALC	galactosylceramidase [EC:3.2.1.46]	ko01100	Metabolic pathways	http://www.kegg.jp/kegg-bin/show_pathway?ko01100+K01202
P54803	K01202	GALC	galactosylceramidase [EC:3.2.1.46]	ko04142	Lysosome	http://www.kegg.jp/kegg-bin/show_pathway?ko04142+K01202
Q9Y4G8	K08018	RAPGEF2, PDZGEF1	Rap guanine nucleotide exchange factor 2	ko04010	MAPK signaling pathway	http://www.kegg.jp/kegg-bin/show_pathway?ko04010+K08018
Q9Y4G8	K08018	RAPGEF2, PDZGEF1	Rap guanine nucleotide exchange factor 2	ko04015	Rap1 signaling pathway	http://www.kegg.jp/kegg-bin/show_pathway?ko04015+K08018
Q9Y4G8	K08018	RAPGEF2, PDZGEF1	Rap guanine nucleotide exchange factor 2	ko04530	Tight junction	http://www.kegg.jp/kegg-bin/show_pathway?ko04530+K08018
P20339	K07887	RAB5A	Ras-related protein Rab-5A	ko04014	Ras signaling pathway	http://www.kegg.jp/kegg-bin/show_pathway?ko04014+K07887
P20339	K07887	RAB5A	Ras-related protein Rab-5A	ko04144	Endocytosis	http://www.kegg.jp/kegg-bin/show_pathway?ko04144+K07887
P20339	K07887	RAB5A	Ras-related protein Rab-5A	ko04145	Phagosome	http://www.kegg.jp/kegg-bin/show_pathway?ko04145+K07887
P20339	K07887	RAB5A	Ras-related protein Rab-5A	ko04962	Vasopressin-regulated water reabsorption	http://www.kegg.jp/kegg-bin/show_pathway?ko04962+K07887
P20339	K07887	RAB5A	Ras-related protein Rab-5A	ko05014	Amyotrophic lateral sclerosis (ALS)	http://www.kegg.jp/kegg-bin/show_pathway?ko05014+K07887
P20339	K07887	RAB5A	Ras-related protein Rab-5A	ko05132	Salmonella infection	http://www.kegg.jp/kegg-bin/show_pathway?ko05132+K07887
P20339	K07887	RAB5A	Ras-related protein Rab-5A	ko05146	Amoebiasis	http://www.kegg.jp/kegg-bin/show_pathway?ko05146+K07887
P20339	K07887	RAB5A	Ras-related protein Rab-5A	ko05152	Tuberculosis	http://www.kegg.jp/kegg-bin/show_pathway?ko05152+K07887
P23634	K05850	ATP2B	P-type Ca2+ transporter type 2B [EC:7.2.2.10]	ko04020	Calcium signaling pathway	http://www.kegg.jp/kegg-bin/show_pathway?ko04020+K05850
P23634	K05850	ATP2B	P-type Ca2+ transporter type 2B [EC:7.2.2.10]	ko04022	cGMP-PKG signaling pathway	http://www.kegg.jp/kegg-bin/show_pathway?ko04022+K05850
P23634	K05850	ATP2B	P-type Ca2+ transporter type 2B [EC:7.2.2.10]	ko04024	cAMP signaling pathway	http://www.kegg.jp/kegg-bin/show_pathway?ko04024+K05850
P23634	K05850	ATP2B	P-type Ca2+ transporter type 2B [EC:7.2.2.10]	ko04261	Adrenergic signaling in cardiomyocytes	http://www.kegg.jp/kegg-bin/show_pathway?ko04261+K05850
P23634	K05850	ATP2B	P-type Ca2+ transporter type 2B [EC:7.2.2.10]	ko04925	Aldosterone synthesis and secretion	http://www.kegg.jp/kegg-bin/show_pathway?ko04925+K05850
P23634	K05850	ATP2B	P-type Ca2+ transporter type 2B [EC:7.2.2.10]	ko04961	Endocrine and other factor-regulated calcium reabsorption	http://www.kegg.jp/kegg-bin/show_pathway?ko04961+K05850
P23634	K05850	ATP2B	P-type Ca2+ transporter type 2B [EC:7.2.2.10]	ko04970	Salivary secretion	http://www.kegg.jp/kegg-bin/show_pathway?ko04970+K05850
P23634	K05850	ATP2B	P-type Ca2+ transporter type 2B [EC:7.2.2.10]	ko04972	Pancreatic secretion	http://www.kegg.jp/kegg-bin/show_pathway?ko04972+K05850
P23634	K05850	ATP2B	P-type Ca2+ transporter type 2B [EC:7.2.2.10]	ko04978	Mineral absorption	http://www.kegg.jp/kegg-bin/show_pathway?ko04978+K05850
Q6ZXV5	K23424	TMTC	protein O-mannosyl-transferase [EC:2.4.1.-]
Q8NBJ4
O75093	K06838	SLIT1	slit 1	ko04360	Axon guidance	http://www.kegg.jp/kegg-bin/show_pathway?ko04360+K06838
Q96K49
Q12841	K23912	FSTL1	follistatin-related protein 1
P61009	K12948	SPCS3, SPC3	signal peptidase complex subunit 3 [EC:3.4.-.-]	ko03060	Protein export	http://www.kegg.jp/kegg-bin/show_pathway?ko03060+K12948
O00469	K13645	PLOD2	procollagen-lysine,2-oxoglutarate 5-dioxygenase 2 [EC:1.14.11.4]	ko00310	Lysine degradation	http://www.kegg.jp/kegg-bin/show_pathway?ko00310+K13645
O00469	K13645	PLOD2	procollagen-lysine,2-oxoglutarate 5-dioxygenase 2 [EC:1.14.11.4]	ko01100	Metabolic pathways	http://www.kegg.jp/kegg-bin/show_pathway?ko01100+K13645
Q13308	K05127	PTK7, CCK4	PTK7 protein tyrosine kinase 7 [EC:2.7.10.1]
Q9UII2	K22255	ATPIF1	ATPase inhibitor, mitochondrial
Q00688	K09570	FKBP3	FK506-binding protein 3 [EC:5.2.1.8]
Q5TC84
Q8IV20	K05810	yfiH	polyphenol oxidase [EC:1.10.3.-]
P15151	K06539	PVR, NECL5, CD155	poliovirus receptor	ko04514	Cell adhesion molecules (CAMs)	http://www.kegg.jp/kegg-bin/show_pathway?ko04514+K06539
Q9BSR8	K22942	YIPF4	protein YIPF4
Q86X83	K22558	COMMD2	COMM domain containing 2
Q8NDA8
Q8WW59
Q03518	K05653	ABCB2, TAP1	ATP-binding cassette, subfamily B (MDR/TAP), member 2	ko02010	ABC transporters	http://www.kegg.jp/kegg-bin/show_pathway?ko02010+K05653
Q03518	K05653	ABCB2, TAP1	ATP-binding cassette, subfamily B (MDR/TAP), member 2	ko04145	Phagosome	http://www.kegg.jp/kegg-bin/show_pathway?ko04145+K05653
Q03518	K05653	ABCB2, TAP1	ATP-binding cassette, subfamily B (MDR/TAP), member 2	ko04612	Antigen processing and presentation	http://www.kegg.jp/kegg-bin/show_pathway?ko04612+K05653
Q03518	K05653	ABCB2, TAP1	ATP-binding cassette, subfamily B (MDR/TAP), member 2	ko05163	Human cytomegalovirus infection	http://www.kegg.jp/kegg-bin/show_pathway?ko05163+K05653
Q03518	K05653	ABCB2, TAP1	ATP-binding cassette, subfamily B (MDR/TAP), member 2	ko05168	Herpes simplex virus 1 infection	http://www.kegg.jp/kegg-bin/show_pathway?ko05168+K05653
Q03518	K05653	ABCB2, TAP1	ATP-binding cassette, subfamily B (MDR/TAP), member 2	ko05169	Epstein-Barr virus infection	http://www.kegg.jp/kegg-bin/show_pathway?ko05169+K05653
Q03518	K05653	ABCB2, TAP1	ATP-binding cassette, subfamily B (MDR/TAP), member 2	ko05170	Human immunodeficiency virus 1 infection	http://www.kegg.jp/kegg-bin/show_pathway?ko05170+K05653
Q03518	K05653	ABCB2, TAP1	ATP-binding cassette, subfamily B (MDR/TAP), member 2	ko05340	Primary immunodeficiency	http://www.kegg.jp/kegg-bin/show_pathway?ko05340+K05653
Q6UWE0	K10641	LRSAM1	E3 ubiquitin-protein ligase LRSAM1 [EC:2.3.2.27]
Q9H7C9
Q8TBQ9
P35237
Q92520
Q96SW2	K11793	CRBN	cereblon
P21589	K19970	NT5E, CD73	5'-nucleotidase [EC:3.1.3.5]	ko00230	Purine metabolism	http://www.kegg.jp/kegg-bin/show_pathway?ko00230+K19970
P21589	K19970	NT5E, CD73	5'-nucleotidase [EC:3.1.3.5]	ko00240	Pyrimidine metabolism	http://www.kegg.jp/kegg-bin/show_pathway?ko00240+K19970
P21589	K19970	NT5E, CD73	5'-nucleotidase [EC:3.1.3.5]	ko00760	Nicotinate and nicotinamide metabolism	http://www.kegg.jp/kegg-bin/show_pathway?ko00760+K19970
P21589	K19970	NT5E, CD73	5'-nucleotidase [EC:3.1.3.5]	ko01100	Metabolic pathways	http://www.kegg.jp/kegg-bin/show_pathway?ko01100+K19970
P21589	K19970	NT5E, CD73	5'-nucleotidase [EC:3.1.3.5]	ko01110	Biosynthesis of secondary metabolites	http://www.kegg.jp/kegg-bin/show_pathway?ko01110+K19970
Q9P2E9	K14000	RRBP1	ribosome-binding protein 1	ko04141	Protein processing in endoplasmic reticulum	http://www.kegg.jp/kegg-bin/show_pathway?ko04141+K14000
Q9UBR2	K08568	CTSZ	cathepsin X [EC:3.4.18.1]	ko04142	Lysosome	http://www.kegg.jp/kegg-bin/show_pathway?ko04142+K08568
Q9UBR2	K08568	CTSZ	cathepsin X [EC:3.4.18.1]	ko04210	Apoptosis	http://www.kegg.jp/kegg-bin/show_pathway?ko04210+K08568
P52943
Q7Z3E5	K22864	ARMC9	LisH domain-containing protein ARMC9
Q9Y2H6
Q15847	K21408	ADIRF	adipogenesis regulatory factor
Q92844	K12650	TANK	TRAF family member-associated NF-kappa-B activator	ko04140	Autophagy - animal	http://www.kegg.jp/kegg-bin/show_pathway?ko04140+K12650
Q92844	K12650	TANK	TRAF family member-associated NF-kappa-B activator	ko04621	NOD-like receptor signaling pathway	http://www.kegg.jp/kegg-bin/show_pathway?ko04621+K12650
Q92844	K12650	TANK	TRAF family member-associated NF-kappa-B activator	ko04622	RIG-I-like receptor signaling pathway	http://www.kegg.jp/kegg-bin/show_pathway?ko04622+K12650
L0R6Q1
Q86W25	K22665	NLRP13, NALP13	NACHT, LRR and PYD domains-containing protein 13
O75674
Q9NW68
P21695	K00006	GPD1	glycerol-3-phosphate dehydrogenase (NAD+) [EC:1.1.1.8]	ko00564	Glycerophospholipid metabolism	http://www.kegg.jp/kegg-bin/show_pathway?ko00564+K00006
P21695	K00006	GPD1	glycerol-3-phosphate dehydrogenase (NAD+) [EC:1.1.1.8]	ko01110	Biosynthesis of secondary metabolites	http://www.kegg.jp/kegg-bin/show_pathway?ko01110+K00006
P21695	K00006	GPD1	glycerol-3-phosphate dehydrogenase (NAD+) [EC:1.1.1.8]	ko04011	MAPK signaling pathway - yeast	http://www.kegg.jp/kegg-bin/show_pathway?ko04011+K00006
Q9BXS4
P10321	K06751	MHC1	MHC class I antigen	ko04144	Endocytosis	http://www.kegg.jp/kegg-bin/show_pathway?ko04144+K06751
P10321	K06751	MHC1	MHC class I antigen	ko04145	Phagosome	http://www.kegg.jp/kegg-bin/show_pathway?ko04145+K06751
P10321	K06751	MHC1	MHC class I antigen	ko04218	Cellular senescence	http://www.kegg.jp/kegg-bin/show_pathway?ko04218+K06751
P10321	K06751	MHC1	MHC class I antigen	ko04514	Cell adhesion molecules (CAMs)	http://www.kegg.jp/kegg-bin/show_pathway?ko04514+K06751
P10321	K06751	MHC1	MHC class I antigen	ko04612	Antigen processing and presentation	http://www.kegg.jp/kegg-bin/show_pathway?ko04612+K06751
P10321	K06751	MHC1	MHC class I antigen	ko04940	Type I diabetes mellitus	http://www.kegg.jp/kegg-bin/show_pathway?ko04940+K06751
P10321	K06751	MHC1	MHC class I antigen	ko05163	Human cytomegalovirus infection	http://www.kegg.jp/kegg-bin/show_pathway?ko05163+K06751
P10321	K06751	MHC1	MHC class I antigen	ko05165	Human papillomavirus infection	http://www.kegg.jp/kegg-bin/show_pathway?ko05165+K06751
P10321	K06751	MHC1	MHC class I antigen	ko05166	Human T-cell leukemia virus 1 infection	http://www.kegg.jp/kegg-bin/show_pathway?ko05166+K06751
P10321	K06751	MHC1	MHC class I antigen	ko05167	Kaposi sarcoma-associated herpesvirus infection	http://www.kegg.jp/kegg-bin/show_pathway?ko05167+K06751
P10321	K06751	MHC1	MHC class I antigen	ko05168	Herpes simplex virus 1 infection	http://www.kegg.jp/kegg-bin/show_pathway?ko05168+K06751
P10321	K06751	MHC1	MHC class I antigen	ko05169	Epstein-Barr virus infection	http://www.kegg.jp/kegg-bin/show_pathway?ko05169+K06751
P10321	K06751	MHC1	MHC class I antigen	ko05170	Human immunodeficiency virus 1 infection	http://www.kegg.jp/kegg-bin/show_pathway?ko05170+K06751
P10321	K06751	MHC1	MHC class I antigen	ko05203	Viral carcinogenesis	http://www.kegg.jp/kegg-bin/show_pathway?ko05203+K06751
P10321	K06751	MHC1	MHC class I antigen	ko05320	Autoimmune thyroid disease	http://www.kegg.jp/kegg-bin/show_pathway?ko05320+K06751
P10321	K06751	MHC1	MHC class I antigen	ko05330	Allograft rejection	http://www.kegg.jp/kegg-bin/show_pathway?ko05330+K06751
P10321	K06751	MHC1	MHC class I antigen	ko05332	Graft-versus-host disease	http://www.kegg.jp/kegg-bin/show_pathway?ko05332+K06751
P10321	K06751	MHC1	MHC class I antigen	ko05416	Viral myocarditis	http://www.kegg.jp/kegg-bin/show_pathway?ko05416+K06751
Q9H4G4
Q92820	K01307	GGH	gamma-glutamyl hydrolase [EC:3.4.19.9]	ko00790	Folate biosynthesis	http://www.kegg.jp/kegg-bin/show_pathway?ko00790+K01307
Q92820	K01307	GGH	gamma-glutamyl hydrolase [EC:3.4.19.9]	ko01523	Antifolate resistance	http://www.kegg.jp/kegg-bin/show_pathway?ko01523+K01307
Q9UQN3	K12192	CHMP2B	charged multivesicular body protein 2B	ko04144	Endocytosis	http://www.kegg.jp/kegg-bin/show_pathway?ko04144+K12192
Q9UQN3	K12192	CHMP2B	charged multivesicular body protein 2B	ko04217	Necroptosis	http://www.kegg.jp/kegg-bin/show_pathway?ko04217+K12192
P04439	K06751	MHC1	MHC class I antigen	ko04144	Endocytosis	http://www.kegg.jp/kegg-bin/show_pathway?ko04144+K06751
P04439	K06751	MHC1	MHC class I antigen	ko04145	Phagosome	http://www.kegg.jp/kegg-bin/show_pathway?ko04145+K06751
P04439	K06751	MHC1	MHC class I antigen	ko04218	Cellular senescence	http://www.kegg.jp/kegg-bin/show_pathway?ko04218+K06751
P04439	K06751	MHC1	MHC class I antigen	ko04514	Cell adhesion molecules (CAMs)	http://www.kegg.jp/kegg-bin/show_pathway?ko04514+K06751
P04439	K06751	MHC1	MHC class I antigen	ko04612	Antigen processing and presentation	http://www.kegg.jp/kegg-bin/show_pathway?ko04612+K06751
P04439	K06751	MHC1	MHC class I antigen	ko04940	Type I diabetes mellitus	http://www.kegg.jp/kegg-bin/show_pathway?ko04940+K06751
P04439	K06751	MHC1	MHC class I antigen	ko05163	Human cytomegalovirus infection	http://www.kegg.jp/kegg-bin/show_pathway?ko05163+K06751
P04439	K06751	MHC1	MHC class I antigen	ko05165	Human papillomavirus infection	http://www.kegg.jp/kegg-bin/show_pathway?ko05165+K06751
P04439	K06751	MHC1	MHC class I antigen	ko05166	Human T-cell leukemia virus 1 infection	http://www.kegg.jp/kegg-bin/show_pathway?ko05166+K06751
P04439	K06751	MHC1	MHC class I antigen	ko05167	Kaposi sarcoma-associated herpesvirus infection	http://www.kegg.jp/kegg-bin/show_pathway?ko05167+K06751
P04439	K06751	MHC1	MHC class I antigen	ko05168	Herpes simplex virus 1 infection	http://www.kegg.jp/kegg-bin/show_pathway?ko05168+K06751
P04439	K06751	MHC1	MHC class I antigen	ko05169	Epstein-Barr virus infection	http://www.kegg.jp/kegg-bin/show_pathway?ko05169+K06751
P04439	K06751	MHC1	MHC class I antigen	ko05170	Human immunodeficiency virus 1 infection	http://www.kegg.jp/kegg-bin/show_pathway?ko05170+K06751
P04439	K06751	MHC1	MHC class I antigen	ko05203	Viral carcinogenesis	http://www.kegg.jp/kegg-bin/show_pathway?ko05203+K06751
P04439	K06751	MHC1	MHC class I antigen	ko05320	Autoimmune thyroid disease	http://www.kegg.jp/kegg-bin/show_pathway?ko05320+K06751
P04439	K06751	MHC1	MHC class I antigen	ko05330	Allograft rejection	http://www.kegg.jp/kegg-bin/show_pathway?ko05330+K06751
P04439	K06751	MHC1	MHC class I antigen	ko05332	Graft-versus-host disease	http://www.kegg.jp/kegg-bin/show_pathway?ko05332+K06751
P04439	K06751	MHC1	MHC class I antigen	ko05416	Viral myocarditis	http://www.kegg.jp/kegg-bin/show_pathway?ko05416+K06751
Q8TED1	K00432	gpx, btuE, bsaA	glutathione peroxidase [EC:1.11.1.9]	ko00480	Glutathione metabolism	http://www.kegg.jp/kegg-bin/show_pathway?ko00480+K00432
Q8TED1	K00432	gpx, btuE, bsaA	glutathione peroxidase [EC:1.11.1.9]	ko00590	Arachidonic acid metabolism	http://www.kegg.jp/kegg-bin/show_pathway?ko00590+K00432
Q8TED1	K00432	gpx, btuE, bsaA	glutathione peroxidase [EC:1.11.1.9]	ko01100	Metabolic pathways	http://www.kegg.jp/kegg-bin/show_pathway?ko01100+K00432
Q8TED1	K00432	gpx, btuE, bsaA	glutathione peroxidase [EC:1.11.1.9]	ko04918	Thyroid hormone synthesis	http://www.kegg.jp/kegg-bin/show_pathway?ko04918+K00432
Q8TED1	K00432	gpx, btuE, bsaA	glutathione peroxidase [EC:1.11.1.9]	ko05014	Amyotrophic lateral sclerosis (ALS)	http://www.kegg.jp/kegg-bin/show_pathway?ko05014+K00432
Q8TED1	K00432	gpx, btuE, bsaA	glutathione peroxidase [EC:1.11.1.9]	ko05016	Huntington disease	http://www.kegg.jp/kegg-bin/show_pathway?ko05016+K00432
P63218	K04542	GNG5	guanine nucleotide-binding protein G(I)/G(S)/G(O) subunit gamma-5	ko04014	Ras signaling pathway	http://www.kegg.jp/kegg-bin/show_pathway?ko04014+K04542
P63218	K04542	GNG5	guanine nucleotide-binding protein G(I)/G(S)/G(O) subunit gamma-5	ko04062	Chemokine signaling pathway	http://www.kegg.jp/kegg-bin/show_pathway?ko04062+K04542
P63218	K04542	GNG5	guanine nucleotide-binding protein G(I)/G(S)/G(O) subunit gamma-5	ko04151	PI3K-Akt signaling pathway	http://www.kegg.jp/kegg-bin/show_pathway?ko04151+K04542
P63218	K04542	GNG5	guanine nucleotide-binding protein G(I)/G(S)/G(O) subunit gamma-5	ko04371	Apelin signaling pathway	http://www.kegg.jp/kegg-bin/show_pathway?ko04371+K04542
P63218	K04542	GNG5	guanine nucleotide-binding protein G(I)/G(S)/G(O) subunit gamma-5	ko04713	Circadian entrainment	http://www.kegg.jp/kegg-bin/show_pathway?ko04713+K04542
P63218	K04542	GNG5	guanine nucleotide-binding protein G(I)/G(S)/G(O) subunit gamma-5	ko04723	Retrograde endocannabinoid signaling	http://www.kegg.jp/kegg-bin/show_pathway?ko04723+K04542
P63218	K04542	GNG5	guanine nucleotide-binding protein G(I)/G(S)/G(O) subunit gamma-5	ko04724	Glutamatergic synapse	http://www.kegg.jp/kegg-bin/show_pathway?ko04724+K04542
P63218	K04542	GNG5	guanine nucleotide-binding protein G(I)/G(S)/G(O) subunit gamma-5	ko04725	Cholinergic synapse	http://www.kegg.jp/kegg-bin/show_pathway?ko04725+K04542
P63218	K04542	GNG5	guanine nucleotide-binding protein G(I)/G(S)/G(O) subunit gamma-5	ko04726	Serotonergic synapse	http://www.kegg.jp/kegg-bin/show_pathway?ko04726+K04542
P63218	K04542	GNG5	guanine nucleotide-binding protein G(I)/G(S)/G(O) subunit gamma-5	ko04727	GABAergic synapse	http://www.kegg.jp/kegg-bin/show_pathway?ko04727+K04542
P63218	K04542	GNG5	guanine nucleotide-binding protein G(I)/G(S)/G(O) subunit gamma-5	ko04728	Dopaminergic synapse	http://www.kegg.jp/kegg-bin/show_pathway?ko04728+K04542
P63218	K04542	GNG5	guanine nucleotide-binding protein G(I)/G(S)/G(O) subunit gamma-5	ko04926	Relaxin signaling pathway	http://www.kegg.jp/kegg-bin/show_pathway?ko04926+K04542
P63218	K04542	GNG5	guanine nucleotide-binding protein G(I)/G(S)/G(O) subunit gamma-5	ko05032	Morphine addiction	http://www.kegg.jp/kegg-bin/show_pathway?ko05032+K04542
P63218	K04542	GNG5	guanine nucleotide-binding protein G(I)/G(S)/G(O) subunit gamma-5	ko05034	Alcoholism	http://www.kegg.jp/kegg-bin/show_pathway?ko05034+K04542
P63218	K04542	GNG5	guanine nucleotide-binding protein G(I)/G(S)/G(O) subunit gamma-5	ko05163	Human cytomegalovirus infection	http://www.kegg.jp/kegg-bin/show_pathway?ko05163+K04542
P63218	K04542	GNG5	guanine nucleotide-binding protein G(I)/G(S)/G(O) subunit gamma-5	ko05167	Kaposi sarcoma-associated herpesvirus infection	http://www.kegg.jp/kegg-bin/show_pathway?ko05167+K04542
P63218	K04542	GNG5	guanine nucleotide-binding protein G(I)/G(S)/G(O) subunit gamma-5	ko05170	Human immunodeficiency virus 1 infection	http://www.kegg.jp/kegg-bin/show_pathway?ko05170+K04542
P63218	K04542	GNG5	guanine nucleotide-binding protein G(I)/G(S)/G(O) subunit gamma-5	ko05200	Pathways in cancer	http://www.kegg.jp/kegg-bin/show_pathway?ko05200+K04542
P22694	K04345	PKA	protein kinase A [EC:2.7.11.11]	ko01522	Endocrine resistance	http://www.kegg.jp/kegg-bin/show_pathway?ko01522+K04345
P22694	K04345	PKA	protein kinase A [EC:2.7.11.11]	ko04010	MAPK signaling pathway	http://www.kegg.jp/kegg-bin/show_pathway?ko04010+K04345
P22694	K04345	PKA	protein kinase A [EC:2.7.11.11]	ko04014	Ras signaling pathway	http://www.kegg.jp/kegg-bin/show_pathway?ko04014+K04345
P22694	K04345	PKA	protein kinase A [EC:2.7.11.11]	ko04020	Calcium signaling pathway	http://www.kegg.jp/kegg-bin/show_pathway?ko04020+K04345
P22694	K04345	PKA	protein kinase A [EC:2.7.11.11]	ko04024	cAMP signaling pathway	http://www.kegg.jp/kegg-bin/show_pathway?ko04024+K04345
P22694	K04345	PKA	protein kinase A [EC:2.7.11.11]	ko04062	Chemokine signaling pathway	http://www.kegg.jp/kegg-bin/show_pathway?ko04062+K04345
P22694	K04345	PKA	protein kinase A [EC:2.7.11.11]	ko04113	Meiosis - yeast	http://www.kegg.jp/kegg-bin/show_pathway?ko04113+K04345
P22694	K04345	PKA	protein kinase A [EC:2.7.11.11]	ko04114	Oocyte meiosis	http://www.kegg.jp/kegg-bin/show_pathway?ko04114+K04345
P22694	K04345	PKA	protein kinase A [EC:2.7.11.11]	ko04138	Autophagy - yeast	http://www.kegg.jp/kegg-bin/show_pathway?ko04138+K04345
P22694	K04345	PKA	protein kinase A [EC:2.7.11.11]	ko04140	Autophagy - animal	http://www.kegg.jp/kegg-bin/show_pathway?ko04140+K04345
P22694	K04345	PKA	protein kinase A [EC:2.7.11.11]	ko04211	Longevity regulating pathway	http://www.kegg.jp/kegg-bin/show_pathway?ko04211+K04345
P22694	K04345	PKA	protein kinase A [EC:2.7.11.11]	ko04213	Longevity regulating pathway - multiple species	http://www.kegg.jp/kegg-bin/show_pathway?ko04213+K04345
P22694	K04345	PKA	protein kinase A [EC:2.7.11.11]	ko04261	Adrenergic signaling in cardiomyocytes	http://www.kegg.jp/kegg-bin/show_pathway?ko04261+K04345
P22694	K04345	PKA	protein kinase A [EC:2.7.11.11]	ko04270	Vascular smooth muscle contraction	http://www.kegg.jp/kegg-bin/show_pathway?ko04270+K04345
P22694	K04345	PKA	protein kinase A [EC:2.7.11.11]	ko04310	Wnt signaling pathway	http://www.kegg.jp/kegg-bin/show_pathway?ko04310+K04345
P22694	K04345	PKA	protein kinase A [EC:2.7.11.11]	ko04340	Hedgehog signaling pathway	http://www.kegg.jp/kegg-bin/show_pathway?ko04340+K04345
P22694	K04345	PKA	protein kinase A [EC:2.7.11.11]	ko04341	Hedgehog signaling pathway - fly	http://www.kegg.jp/kegg-bin/show_pathway?ko04341+K04345
P22694	K04345	PKA	protein kinase A [EC:2.7.11.11]	ko04361	Axon regeneration	http://www.kegg.jp/kegg-bin/show_pathway?ko04361+K04345
P22694	K04345	PKA	protein kinase A [EC:2.7.11.11]	ko04371	Apelin signaling pathway	http://www.kegg.jp/kegg-bin/show_pathway?ko04371+K04345
P22694	K04345	PKA	protein kinase A [EC:2.7.11.11]	ko04530	Tight junction	http://www.kegg.jp/kegg-bin/show_pathway?ko04530+K04345
P22694	K04345	PKA	protein kinase A [EC:2.7.11.11]	ko04540	Gap junction	http://www.kegg.jp/kegg-bin/show_pathway?ko04540+K04345
P22694	K04345	PKA	protein kinase A [EC:2.7.11.11]	ko04611	Platelet activation	http://www.kegg.jp/kegg-bin/show_pathway?ko04611+K04345
P22694	K04345	PKA	protein kinase A [EC:2.7.11.11]	ko04713	Circadian entrainment	http://www.kegg.jp/kegg-bin/show_pathway?ko04713+K04345
P22694	K04345	PKA	protein kinase A [EC:2.7.11.11]	ko04714	Thermogenesis	http://www.kegg.jp/kegg-bin/show_pathway?ko04714+K04345
P22694	K04345	PKA	protein kinase A [EC:2.7.11.11]	ko04720	Long-term potentiation	http://www.kegg.jp/kegg-bin/show_pathway?ko04720+K04345
P22694	K04345	PKA	protein kinase A [EC:2.7.11.11]	ko04723	Retrograde endocannabinoid signaling	http://www.kegg.jp/kegg-bin/show_pathway?ko04723+K04345
P22694	K04345	PKA	protein kinase A [EC:2.7.11.11]	ko04724	Glutamatergic synapse	http://www.kegg.jp/kegg-bin/show_pathway?ko04724+K04345
P22694	K04345	PKA	protein kinase A [EC:2.7.11.11]	ko04725	Cholinergic synapse	http://www.kegg.jp/kegg-bin/show_pathway?ko04725+K04345
P22694	K04345	PKA	protein kinase A [EC:2.7.11.11]	ko04726	Serotonergic synapse	http://www.kegg.jp/kegg-bin/show_pathway?ko04726+K04345
P22694	K04345	PKA	protein kinase A [EC:2.7.11.11]	ko04727	GABAergic synapse	http://www.kegg.jp/kegg-bin/show_pathway?ko04727+K04345
P22694	K04345	PKA	protein kinase A [EC:2.7.11.11]	ko04728	Dopaminergic synapse	http://www.kegg.jp/kegg-bin/show_pathway?ko04728+K04345
P22694	K04345	PKA	protein kinase A [EC:2.7.11.11]	ko04740	Olfactory transduction	http://www.kegg.jp/kegg-bin/show_pathway?ko04740+K04345
P22694	K04345	PKA	protein kinase A [EC:2.7.11.11]	ko04742	Taste transduction	http://www.kegg.jp/kegg-bin/show_pathway?ko04742+K04345
P22694	K04345	PKA	protein kinase A [EC:2.7.11.11]	ko04750	Inflammatory mediator regulation of TRP channels	http://www.kegg.jp/kegg-bin/show_pathway?ko04750+K04345
P22694	K04345	PKA	protein kinase A [EC:2.7.11.11]	ko04910	Insulin signaling pathway	http://www.kegg.jp/kegg-bin/show_pathway?ko04910+K04345
P22694	K04345	PKA	protein kinase A [EC:2.7.11.11]	ko04911	Insulin secretion	http://www.kegg.jp/kegg-bin/show_pathway?ko04911+K04345
P22694	K04345	PKA	protein kinase A [EC:2.7.11.11]	ko04912	GnRH signaling pathway	http://www.kegg.jp/kegg-bin/show_pathway?ko04912+K04345
P22694	K04345	PKA	protein kinase A [EC:2.7.11.11]	ko04913	Ovarian steroidogenesis	http://www.kegg.jp/kegg-bin/show_pathway?ko04913+K04345
P22694	K04345	PKA	protein kinase A [EC:2.7.11.11]	ko04914	Progesterone-mediated oocyte maturation	http://www.kegg.jp/kegg-bin/show_pathway?ko04914+K04345
P22694	K04345	PKA	protein kinase A [EC:2.7.11.11]	ko04915	Estrogen signaling pathway	http://www.kegg.jp/kegg-bin/show_pathway?ko04915+K04345
P22694	K04345	PKA	protein kinase A [EC:2.7.11.11]	ko04916	Melanogenesis	http://www.kegg.jp/kegg-bin/show_pathway?ko04916+K04345
P22694	K04345	PKA	protein kinase A [EC:2.7.11.11]	ko04918	Thyroid hormone synthesis	http://www.kegg.jp/kegg-bin/show_pathway?ko04918+K04345
P22694	K04345	PKA	protein kinase A [EC:2.7.11.11]	ko04919	Thyroid hormone signaling pathway	http://www.kegg.jp/kegg-bin/show_pathway?ko04919+K04345
P22694	K04345	PKA	protein kinase A [EC:2.7.11.11]	ko04921	Oxytocin signaling pathway	http://www.kegg.jp/kegg-bin/show_pathway?ko04921+K04345
P22694	K04345	PKA	protein kinase A [EC:2.7.11.11]	ko04922	Glucagon signaling pathway	http://www.kegg.jp/kegg-bin/show_pathway?ko04922+K04345
P22694	K04345	PKA	protein kinase A [EC:2.7.11.11]	ko04923	Regulation of lipolysis in adipocytes	http://www.kegg.jp/kegg-bin/show_pathway?ko04923+K04345
P22694	K04345	PKA	protein kinase A [EC:2.7.11.11]	ko04924	Renin secretion	http://www.kegg.jp/kegg-bin/show_pathway?ko04924+K04345
P22694	K04345	PKA	protein kinase A [EC:2.7.11.11]	ko04925	Aldosterone synthesis and secretion	http://www.kegg.jp/kegg-bin/show_pathway?ko04925+K04345
P22694	K04345	PKA	protein kinase A [EC:2.7.11.11]	ko04926	Relaxin signaling pathway	http://www.kegg.jp/kegg-bin/show_pathway?ko04926+K04345
P22694	K04345	PKA	protein kinase A [EC:2.7.11.11]	ko04927	Cortisol synthesis and secretion	http://www.kegg.jp/kegg-bin/show_pathway?ko04927+K04345
P22694	K04345	PKA	protein kinase A [EC:2.7.11.11]	ko04928	Parathyroid hormone synthesis, secretion and action	http://www.kegg.jp/kegg-bin/show_pathway?ko04928+K04345
P22694	K04345	PKA	protein kinase A [EC:2.7.11.11]	ko04934	Cushing syndrome	http://www.kegg.jp/kegg-bin/show_pathway?ko04934+K04345
P22694	K04345	PKA	protein kinase A [EC:2.7.11.11]	ko04935	Growth hormone synthesis, secretion and action	http://www.kegg.jp/kegg-bin/show_pathway?ko04935+K04345
P22694	K04345	PKA	protein kinase A [EC:2.7.11.11]	ko04961	Endocrine and other factor-regulated calcium reabsorption	http://www.kegg.jp/kegg-bin/show_pathway?ko04961+K04345
P22694	K04345	PKA	protein kinase A [EC:2.7.11.11]	ko04962	Vasopressin-regulated water reabsorption	http://www.kegg.jp/kegg-bin/show_pathway?ko04962+K04345
P22694	K04345	PKA	protein kinase A [EC:2.7.11.11]	ko04970	Salivary secretion	http://www.kegg.jp/kegg-bin/show_pathway?ko04970+K04345
P22694	K04345	PKA	protein kinase A [EC:2.7.11.11]	ko04971	Gastric acid secretion	http://www.kegg.jp/kegg-bin/show_pathway?ko04971+K04345
P22694	K04345	PKA	protein kinase A [EC:2.7.11.11]	ko04976	Bile secretion	http://www.kegg.jp/kegg-bin/show_pathway?ko04976+K04345
P22694	K04345	PKA	protein kinase A [EC:2.7.11.11]	ko05012	Parkinson disease	http://www.kegg.jp/kegg-bin/show_pathway?ko05012+K04345
P22694	K04345	PKA	protein kinase A [EC:2.7.11.11]	ko05020	Prion diseases	http://www.kegg.jp/kegg-bin/show_pathway?ko05020+K04345
P22694	K04345	PKA	protein kinase A [EC:2.7.11.11]	ko05030	Cocaine addiction	http://www.kegg.jp/kegg-bin/show_pathway?ko05030+K04345
P22694	K04345	PKA	protein kinase A [EC:2.7.11.11]	ko05031	Amphetamine addiction	http://www.kegg.jp/kegg-bin/show_pathway?ko05031+K04345
P22694	K04345	PKA	protein kinase A [EC:2.7.11.11]	ko05032	Morphine addiction	http://www.kegg.jp/kegg-bin/show_pathway?ko05032+K04345
P22694	K04345	PKA	protein kinase A [EC:2.7.11.11]	ko05034	Alcoholism	http://www.kegg.jp/kegg-bin/show_pathway?ko05034+K04345
P22694	K04345	PKA	protein kinase A [EC:2.7.11.11]	ko05110	Vibrio cholerae infection	http://www.kegg.jp/kegg-bin/show_pathway?ko05110+K04345
P22694	K04345	PKA	protein kinase A [EC:2.7.11.11]	ko05146	Amoebiasis	http://www.kegg.jp/kegg-bin/show_pathway?ko05146+K04345
P22694	K04345	PKA	protein kinase A [EC:2.7.11.11]	ko05163	Human cytomegalovirus infection	http://www.kegg.jp/kegg-bin/show_pathway?ko05163+K04345
P22694	K04345	PKA	protein kinase A [EC:2.7.11.11]	ko05165	Human papillomavirus infection	http://www.kegg.jp/kegg-bin/show_pathway?ko05165+K04345
P22694	K04345	PKA	protein kinase A [EC:2.7.11.11]	ko05166	Human T-cell leukemia virus 1 infection	http://www.kegg.jp/kegg-bin/show_pathway?ko05166+K04345
P22694	K04345	PKA	protein kinase A [EC:2.7.11.11]	ko05200	Pathways in cancer	http://www.kegg.jp/kegg-bin/show_pathway?ko05200+K04345
P22694	K04345	PKA	protein kinase A [EC:2.7.11.11]	ko05203	Viral carcinogenesis	http://www.kegg.jp/kegg-bin/show_pathway?ko05203+K04345
P22694	K04345	PKA	protein kinase A [EC:2.7.11.11]	ko05205	Proteoglycans in cancer	http://www.kegg.jp/kegg-bin/show_pathway?ko05205+K04345
P22694	K04345	PKA	protein kinase A [EC:2.7.11.11]	ko05414	Dilated cardiomyopathy (DCM)	http://www.kegg.jp/kegg-bin/show_pathway?ko05414+K04345
Q9UJ83	K12261	HACL1	2-hydroxyacyl-CoA lyase 1 [EC:4.1.-.-]	ko04146	Peroxisome	http://www.kegg.jp/kegg-bin/show_pathway?ko04146+K12261
Q9Y624	K06089	F11R, JAM1, CD321	junctional adhesion molecule 1	ko04514	Cell adhesion molecules (CAMs)	http://www.kegg.jp/kegg-bin/show_pathway?ko04514+K06089
Q9Y624	K06089	F11R, JAM1, CD321	junctional adhesion molecule 1	ko04530	Tight junction	http://www.kegg.jp/kegg-bin/show_pathway?ko04530+K06089
Q9Y624	K06089	F11R, JAM1, CD321	junctional adhesion molecule 1	ko04670	Leukocyte transendothelial migration	http://www.kegg.jp/kegg-bin/show_pathway?ko04670+K06089
Q9Y624	K06089	F11R, JAM1, CD321	junctional adhesion molecule 1	ko05120	Epithelial cell signaling in Helicobacter pylori infection	http://www.kegg.jp/kegg-bin/show_pathway?ko05120+K06089
P46934	K10591	NEDD4, RSP5	E3 ubiquitin-protein ligase NEDD4 [EC:2.3.2.26]	ko04011	MAPK signaling pathway - yeast	http://www.kegg.jp/kegg-bin/show_pathway?ko04011+K10591
P46934	K10591	NEDD4, RSP5	E3 ubiquitin-protein ligase NEDD4 [EC:2.3.2.26]	ko04120	Ubiquitin mediated proteolysis	http://www.kegg.jp/kegg-bin/show_pathway?ko04120+K10591
P46934	K10591	NEDD4, RSP5	E3 ubiquitin-protein ligase NEDD4 [EC:2.3.2.26]	ko04144	Endocytosis	http://www.kegg.jp/kegg-bin/show_pathway?ko04144+K10591
P46934	K10591	NEDD4, RSP5	E3 ubiquitin-protein ligase NEDD4 [EC:2.3.2.26]	ko04530	Tight junction	http://www.kegg.jp/kegg-bin/show_pathway?ko04530+K10591
P46934	K10591	NEDD4, RSP5	E3 ubiquitin-protein ligase NEDD4 [EC:2.3.2.26]	ko05169	Epstein-Barr virus infection	http://www.kegg.jp/kegg-bin/show_pathway?ko05169+K10591
Q9Y394	K11165	DHRS7	dehydrogenase/reductase SDR family member 7 [EC:1.1.-.-]
Q96HD1
Q9Y2G5	K03691	POFUT	peptide-O-fucosyltransferase [EC:2.4.1.221]	ko00514	Other types of O-glycan biosynthesis	http://www.kegg.jp/kegg-bin/show_pathway?ko00514+K03691
Q9NVM4	K11438	PRMT7	type III protein arginine methyltransferase [EC:2.1.1.321]
O95166	K08341	GABARAP, ATG8, LC3	GABA(A) receptor-associated protein	ko04068	FoxO signaling pathway	http://www.kegg.jp/kegg-bin/show_pathway?ko04068+K08341
O95166	K08341	GABARAP, ATG8, LC3	GABA(A) receptor-associated protein	ko04136	Autophagy - other	http://www.kegg.jp/kegg-bin/show_pathway?ko04136+K08341
O95166	K08341	GABARAP, ATG8, LC3	GABA(A) receptor-associated protein	ko04137	Mitophagy - animal	http://www.kegg.jp/kegg-bin/show_pathway?ko04137+K08341
O95166	K08341	GABARAP, ATG8, LC3	GABA(A) receptor-associated protein	ko04138	Autophagy - yeast	http://www.kegg.jp/kegg-bin/show_pathway?ko04138+K08341
O95166	K08341	GABARAP, ATG8, LC3	GABA(A) receptor-associated protein	ko04139	Mitophagy - yeast	http://www.kegg.jp/kegg-bin/show_pathway?ko04139+K08341
O95166	K08341	GABARAP, ATG8, LC3	GABA(A) receptor-associated protein	ko04140	Autophagy - animal	http://www.kegg.jp/kegg-bin/show_pathway?ko04140+K08341
O95166	K08341	GABARAP, ATG8, LC3	GABA(A) receptor-associated protein	ko04212	Longevity regulating pathway - worm	http://www.kegg.jp/kegg-bin/show_pathway?ko04212+K08341
O95166	K08341	GABARAP, ATG8, LC3	GABA(A) receptor-associated protein	ko04371	Apelin signaling pathway	http://www.kegg.jp/kegg-bin/show_pathway?ko04371+K08341
O95166	K08341	GABARAP, ATG8, LC3	GABA(A) receptor-associated protein	ko04621	NOD-like receptor signaling pathway	http://www.kegg.jp/kegg-bin/show_pathway?ko04621+K08341
O95166	K08341	GABARAP, ATG8, LC3	GABA(A) receptor-associated protein	ko04727	GABAergic synapse	http://www.kegg.jp/kegg-bin/show_pathway?ko04727+K08341
O95166	K08341	GABARAP, ATG8, LC3	GABA(A) receptor-associated protein	ko05131	Shigellosis	http://www.kegg.jp/kegg-bin/show_pathway?ko05131+K08341
O95166	K08341	GABARAP, ATG8, LC3	GABA(A) receptor-associated protein	ko05167	Kaposi sarcoma-associated herpesvirus infection	http://www.kegg.jp/kegg-bin/show_pathway?ko05167+K08341
Q96RF0	K17923	SNX9_18_33	sorting nexin-9/18/33	ko05132	Salmonella infection	http://www.kegg.jp/kegg-bin/show_pathway?ko05132+K17923
Q96LJ7	K11163	DHRS1	dehydrogenase/reductase SDR family member 1 [EC:1.1.-.-]
Q8NBM8
P09914	K14217	IFIT1	interferon-induced protein with tetratricopeptide repeats 1	ko05160	Hepatitis C	http://www.kegg.jp/kegg-bin/show_pathway?ko05160+K14217
P10619	K13289	CTSA, CPY	cathepsin A (carboxypeptidase C) [EC:3.4.16.5]	ko04142	Lysosome	http://www.kegg.jp/kegg-bin/show_pathway?ko04142+K13289
P10619	K13289	CTSA, CPY	cathepsin A (carboxypeptidase C) [EC:3.4.16.5]	ko04614	Renin-angiotensin system	http://www.kegg.jp/kegg-bin/show_pathway?ko04614+K13289
Q9Y6A9	K12946	SPCS1	signal peptidase complex subunit 1 [EC:3.4.-.-]	ko03060	Protein export	http://www.kegg.jp/kegg-bin/show_pathway?ko03060+K12946
P09493	K10373	TPM1	tropomyosin 1	ko04260	Cardiac muscle contraction	http://www.kegg.jp/kegg-bin/show_pathway?ko04260+K10373
P09493	K10373	TPM1	tropomyosin 1	ko04261	Adrenergic signaling in cardiomyocytes	http://www.kegg.jp/kegg-bin/show_pathway?ko04261+K10373
P09493	K10373	TPM1	tropomyosin 1	ko05206	MicroRNAs in cancer	http://www.kegg.jp/kegg-bin/show_pathway?ko05206+K10373
P09493	K10373	TPM1	tropomyosin 1	ko05410	Hypertrophic cardiomyopathy (HCM)	http://www.kegg.jp/kegg-bin/show_pathway?ko05410+K10373
P09493	K10373	TPM1	tropomyosin 1	ko05414	Dilated cardiomyopathy (DCM)	http://www.kegg.jp/kegg-bin/show_pathway?ko05414+K10373
O94808	K00820	glmS, GFPT	glutamine---fructose-6-phosphate transaminase (isomerizing) [EC:2.6.1.16]	ko00250	Alanine, aspartate and glutamate metabolism	http://www.kegg.jp/kegg-bin/show_pathway?ko00250+K00820
O94808	K00820	glmS, GFPT	glutamine---fructose-6-phosphate transaminase (isomerizing) [EC:2.6.1.16]	ko00520	Amino sugar and nucleotide sugar metabolism	http://www.kegg.jp/kegg-bin/show_pathway?ko00520+K00820
O94808	K00820	glmS, GFPT	glutamine---fructose-6-phosphate transaminase (isomerizing) [EC:2.6.1.16]	ko01100	Metabolic pathways	http://www.kegg.jp/kegg-bin/show_pathway?ko01100+K00820
O94808	K00820	glmS, GFPT	glutamine---fructose-6-phosphate transaminase (isomerizing) [EC:2.6.1.16]	ko04931	Insulin resistance	http://www.kegg.jp/kegg-bin/show_pathway?ko04931+K00820
Q9GZM5	K22941	YIPF3, KLIP1	protein YIPF3
Q6P1Q0
P31947	K06644	SFN	stratifin	ko04110	Cell cycle	http://www.kegg.jp/kegg-bin/show_pathway?ko04110+K06644
P31947	K06644	SFN	stratifin	ko04115	p53 signaling pathway	http://www.kegg.jp/kegg-bin/show_pathway?ko04115+K06644
P31947	K06644	SFN	stratifin	ko04960	Aldosterone-regulated sodium reabsorption	http://www.kegg.jp/kegg-bin/show_pathway?ko04960+K06644
Q9H2C0	K10453	KLHL16, GAN	kelch-like protein 16 (gigaxonin)
Q9Y281	K05765	CFL	cofilin	ko04360	Axon guidance	http://www.kegg.jp/kegg-bin/show_pathway?ko04360+K05765
Q9Y281	K05765	CFL	cofilin	ko04666	Fc gamma R-mediated phagocytosis	http://www.kegg.jp/kegg-bin/show_pathway?ko04666+K05765
Q9Y281	K05765	CFL	cofilin	ko04810	Regulation of actin cytoskeleton	http://www.kegg.jp/kegg-bin/show_pathway?ko04810+K05765
Q9Y281	K05765	CFL	cofilin	ko05133	Pertussis	http://www.kegg.jp/kegg-bin/show_pathway?ko05133+K05765
Q9Y281	K05765	CFL	cofilin	ko05170	Human immunodeficiency virus 1 infection	http://www.kegg.jp/kegg-bin/show_pathway?ko05170+K05765
Q9Y6D6	K18442	ARFGEF, BIG	brefeldin A-inhibited guanine nucleotide-exchange protein	ko04144	Endocytosis	http://www.kegg.jp/kegg-bin/show_pathway?ko04144+K18442
Q92599	K16939	SEPT6_8_11	septin 6/8/11	ko05100	Bacterial invasion of epithelial cells	http://www.kegg.jp/kegg-bin/show_pathway?ko05100+K16939
Q92599	K16939	SEPT6_8_11	septin 6/8/11	ko05131	Shigellosis	http://www.kegg.jp/kegg-bin/show_pathway?ko05131+K16939
Q8NAN2
P45973	K11587	CBX5, HP1A	chromobox protein 5
Q15165	K01045	PON	arylesterase / paraoxonase [EC:3.1.1.2 3.1.8.1]
P13747	K06751	MHC1	MHC class I antigen	ko04144	Endocytosis	http://www.kegg.jp/kegg-bin/show_pathway?ko04144+K06751
P13747	K06751	MHC1	MHC class I antigen	ko04145	Phagosome	http://www.kegg.jp/kegg-bin/show_pathway?ko04145+K06751
P13747	K06751	MHC1	MHC class I antigen	ko04218	Cellular senescence	http://www.kegg.jp/kegg-bin/show_pathway?ko04218+K06751
P13747	K06751	MHC1	MHC class I antigen	ko04514	Cell adhesion molecules (CAMs)	http://www.kegg.jp/kegg-bin/show_pathway?ko04514+K06751
P13747	K06751	MHC1	MHC class I antigen	ko04612	Antigen processing and presentation	http://www.kegg.jp/kegg-bin/show_pathway?ko04612+K06751
P13747	K06751	MHC1	MHC class I antigen	ko04940	Type I diabetes mellitus	http://www.kegg.jp/kegg-bin/show_pathway?ko04940+K06751
P13747	K06751	MHC1	MHC class I antigen	ko05163	Human cytomegalovirus infection	http://www.kegg.jp/kegg-bin/show_pathway?ko05163+K06751
P13747	K06751	MHC1	MHC class I antigen	ko05165	Human papillomavirus infection	http://www.kegg.jp/kegg-bin/show_pathway?ko05165+K06751
P13747	K06751	MHC1	MHC class I antigen	ko05166	Human T-cell leukemia virus 1 infection	http://www.kegg.jp/kegg-bin/show_pathway?ko05166+K06751
P13747	K06751	MHC1	MHC class I antigen	ko05167	Kaposi sarcoma-associated herpesvirus infection	http://www.kegg.jp/kegg-bin/show_pathway?ko05167+K06751
P13747	K06751	MHC1	MHC class I antigen	ko05168	Herpes simplex virus 1 infection	http://www.kegg.jp/kegg-bin/show_pathway?ko05168+K06751
P13747	K06751	MHC1	MHC class I antigen	ko05169	Epstein-Barr virus infection	http://www.kegg.jp/kegg-bin/show_pathway?ko05169+K06751
P13747	K06751	MHC1	MHC class I antigen	ko05170	Human immunodeficiency virus 1 infection	http://www.kegg.jp/kegg-bin/show_pathway?ko05170+K06751
P13747	K06751	MHC1	MHC class I antigen	ko05203	Viral carcinogenesis	http://www.kegg.jp/kegg-bin/show_pathway?ko05203+K06751
P13747	K06751	MHC1	MHC class I antigen	ko05320	Autoimmune thyroid disease	http://www.kegg.jp/kegg-bin/show_pathway?ko05320+K06751
P13747	K06751	MHC1	MHC class I antigen	ko05330	Allograft rejection	http://www.kegg.jp/kegg-bin/show_pathway?ko05330+K06751
P13747	K06751	MHC1	MHC class I antigen	ko05332	Graft-versus-host disease	http://www.kegg.jp/kegg-bin/show_pathway?ko05332+K06751
P13747	K06751	MHC1	MHC class I antigen	ko05416	Viral myocarditis	http://www.kegg.jp/kegg-bin/show_pathway?ko05416+K06751
Q9HBL7
P61769	K08055	B2M	beta-2-microglobulin	ko04612	Antigen processing and presentation	http://www.kegg.jp/kegg-bin/show_pathway?ko04612+K08055
P61769	K08055	B2M	beta-2-microglobulin	ko05163	Human cytomegalovirus infection	http://www.kegg.jp/kegg-bin/show_pathway?ko05163+K08055
P61769	K08055	B2M	beta-2-microglobulin	ko05166	Human T-cell leukemia virus 1 infection	http://www.kegg.jp/kegg-bin/show_pathway?ko05166+K08055
P61769	K08055	B2M	beta-2-microglobulin	ko05168	Herpes simplex virus 1 infection	http://www.kegg.jp/kegg-bin/show_pathway?ko05168+K08055
P61769	K08055	B2M	beta-2-microglobulin	ko05169	Epstein-Barr virus infection	http://www.kegg.jp/kegg-bin/show_pathway?ko05169+K08055
P61769	K08055	B2M	beta-2-microglobulin	ko05170	Human immunodeficiency virus 1 infection	http://www.kegg.jp/kegg-bin/show_pathway?ko05170+K08055
Q9BQS8	K21954	FYCO1	FYVE and coiled-coil domain-containing protein 1	ko05132	Salmonella infection	http://www.kegg.jp/kegg-bin/show_pathway?ko05132+K21954
P55085	K04234	F2RL1, PAR2	coagulation factor II (thrombin) receptor-like 1	ko04080	Neuroactive ligand-receptor interaction	http://www.kegg.jp/kegg-bin/show_pathway?ko04080+K04234
P55085	K04234	F2RL1, PAR2	coagulation factor II (thrombin) receptor-like 1	ko04750	Inflammatory mediator regulation of TRP channels	http://www.kegg.jp/kegg-bin/show_pathway?ko04750+K04234
P55085	K04234	F2RL1, PAR2	coagulation factor II (thrombin) receptor-like 1	ko05143	African trypanosomiasis	http://www.kegg.jp/kegg-bin/show_pathway?ko05143+K04234
Q16611	K14021	BAK, BAK1	Bcl-2 homologous antagonist/killer	ko01524	Platinum drug resistance	http://www.kegg.jp/kegg-bin/show_pathway?ko01524+K14021
Q16611	K14021	BAK, BAK1	Bcl-2 homologous antagonist/killer	ko04141	Protein processing in endoplasmic reticulum	http://www.kegg.jp/kegg-bin/show_pathway?ko04141+K14021
Q16611	K14021	BAK, BAK1	Bcl-2 homologous antagonist/killer	ko04210	Apoptosis	http://www.kegg.jp/kegg-bin/show_pathway?ko04210+K14021
Q16611	K14021	BAK, BAK1	Bcl-2 homologous antagonist/killer	ko04215	Apoptosis - multiple species	http://www.kegg.jp/kegg-bin/show_pathway?ko04215+K14021
Q16611	K14021	BAK, BAK1	Bcl-2 homologous antagonist/killer	ko05130	Pathogenic Escherichia coli infection	http://www.kegg.jp/kegg-bin/show_pathway?ko05130+K14021
Q16611	K14021	BAK, BAK1	Bcl-2 homologous antagonist/killer	ko05132	Salmonella infection	http://www.kegg.jp/kegg-bin/show_pathway?ko05132+K14021
Q16611	K14021	BAK, BAK1	Bcl-2 homologous antagonist/killer	ko05160	Hepatitis C	http://www.kegg.jp/kegg-bin/show_pathway?ko05160+K14021
Q16611	K14021	BAK, BAK1	Bcl-2 homologous antagonist/killer	ko05162	Measles	http://www.kegg.jp/kegg-bin/show_pathway?ko05162+K14021
Q16611	K14021	BAK, BAK1	Bcl-2 homologous antagonist/killer	ko05163	Human cytomegalovirus infection	http://www.kegg.jp/kegg-bin/show_pathway?ko05163+K14021
Q16611	K14021	BAK, BAK1	Bcl-2 homologous antagonist/killer	ko05164	Influenza A	http://www.kegg.jp/kegg-bin/show_pathway?ko05164+K14021
Q16611	K14021	BAK, BAK1	Bcl-2 homologous antagonist/killer	ko05165	Human papillomavirus infection	http://www.kegg.jp/kegg-bin/show_pathway?ko05165+K14021
Q16611	K14021	BAK, BAK1	Bcl-2 homologous antagonist/killer	ko05167	Kaposi sarcoma-associated herpesvirus infection	http://www.kegg.jp/kegg-bin/show_pathway?ko05167+K14021
Q16611	K14021	BAK, BAK1	Bcl-2 homologous antagonist/killer	ko05168	Herpes simplex virus 1 infection	http://www.kegg.jp/kegg-bin/show_pathway?ko05168+K14021
Q16611	K14021	BAK, BAK1	Bcl-2 homologous antagonist/killer	ko05169	Epstein-Barr virus infection	http://www.kegg.jp/kegg-bin/show_pathway?ko05169+K14021
Q16611	K14021	BAK, BAK1	Bcl-2 homologous antagonist/killer	ko05170	Human immunodeficiency virus 1 infection	http://www.kegg.jp/kegg-bin/show_pathway?ko05170+K14021
Q16611	K14021	BAK, BAK1	Bcl-2 homologous antagonist/killer	ko05200	Pathways in cancer	http://www.kegg.jp/kegg-bin/show_pathway?ko05200+K14021
Q16611	K14021	BAK, BAK1	Bcl-2 homologous antagonist/killer	ko05202	Transcriptional misregulation in cancer	http://www.kegg.jp/kegg-bin/show_pathway?ko05202+K14021
Q16611	K14021	BAK, BAK1	Bcl-2 homologous antagonist/killer	ko05203	Viral carcinogenesis	http://www.kegg.jp/kegg-bin/show_pathway?ko05203+K14021
Q16611	K14021	BAK, BAK1	Bcl-2 homologous antagonist/killer	ko05206	MicroRNAs in cancer	http://www.kegg.jp/kegg-bin/show_pathway?ko05206+K14021
Q16611	K14021	BAK, BAK1	Bcl-2 homologous antagonist/killer	ko05210	Colorectal cancer	http://www.kegg.jp/kegg-bin/show_pathway?ko05210+K14021
Q16611	K14021	BAK, BAK1	Bcl-2 homologous antagonist/killer	ko05212	Pancreatic cancer	http://www.kegg.jp/kegg-bin/show_pathway?ko05212+K14021
Q16611	K14021	BAK, BAK1	Bcl-2 homologous antagonist/killer	ko05213	Endometrial cancer	http://www.kegg.jp/kegg-bin/show_pathway?ko05213+K14021
Q16611	K14021	BAK, BAK1	Bcl-2 homologous antagonist/killer	ko05214	Glioma	http://www.kegg.jp/kegg-bin/show_pathway?ko05214+K14021
Q16611	K14021	BAK, BAK1	Bcl-2 homologous antagonist/killer	ko05216	Thyroid cancer	http://www.kegg.jp/kegg-bin/show_pathway?ko05216+K14021
Q16611	K14021	BAK, BAK1	Bcl-2 homologous antagonist/killer	ko05217	Basal cell carcinoma	http://www.kegg.jp/kegg-bin/show_pathway?ko05217+K14021
Q16611	K14021	BAK, BAK1	Bcl-2 homologous antagonist/killer	ko05218	Melanoma	http://www.kegg.jp/kegg-bin/show_pathway?ko05218+K14021
Q16611	K14021	BAK, BAK1	Bcl-2 homologous antagonist/killer	ko05220	Chronic myeloid leukemia	http://www.kegg.jp/kegg-bin/show_pathway?ko05220+K14021
Q16611	K14021	BAK, BAK1	Bcl-2 homologous antagonist/killer	ko05222	Small cell lung cancer	http://www.kegg.jp/kegg-bin/show_pathway?ko05222+K14021
Q16611	K14021	BAK, BAK1	Bcl-2 homologous antagonist/killer	ko05223	Non-small cell lung cancer	http://www.kegg.jp/kegg-bin/show_pathway?ko05223+K14021
Q16611	K14021	BAK, BAK1	Bcl-2 homologous antagonist/killer	ko05224	Breast cancer	http://www.kegg.jp/kegg-bin/show_pathway?ko05224+K14021
Q16611	K14021	BAK, BAK1	Bcl-2 homologous antagonist/killer	ko05225	Hepatocellular carcinoma	http://www.kegg.jp/kegg-bin/show_pathway?ko05225+K14021
Q16611	K14021	BAK, BAK1	Bcl-2 homologous antagonist/killer	ko05226	Gastric cancer	http://www.kegg.jp/kegg-bin/show_pathway?ko05226+K14021
P53701	K01764	HCCS	cytochrome c heme-lyase [EC:4.4.1.17]	ko00860	Porphyrin and chlorophyll metabolism	http://www.kegg.jp/kegg-bin/show_pathway?ko00860+K01764
Q8TCD1
P80723	K17272	BASP1	brain acid soluble protein 1
Q9Y282	K20367	ERGIC3, ERV46	endoplasmic reticulum-Golgi intermediate compartment protein 3
O95479	K13937	H6PD	hexose-6-phosphate dehydrogenase [EC:1.1.1.47 3.1.1.31]	ko00030	Pentose phosphate pathway	http://www.kegg.jp/kegg-bin/show_pathway?ko00030+K13937
O95479	K13937	H6PD	hexose-6-phosphate dehydrogenase [EC:1.1.1.47 3.1.1.31]	ko01100	Metabolic pathways	http://www.kegg.jp/kegg-bin/show_pathway?ko01100+K13937
O95479	K13937	H6PD	hexose-6-phosphate dehydrogenase [EC:1.1.1.47 3.1.1.31]	ko01110	Biosynthesis of secondary metabolites	http://www.kegg.jp/kegg-bin/show_pathway?ko01110+K13937
O95479	K13937	H6PD	hexose-6-phosphate dehydrogenase [EC:1.1.1.47 3.1.1.31]	ko01200	Carbon metabolism	http://www.kegg.jp/kegg-bin/show_pathway?ko01200+K13937
Q96PM5	K10144	RCHY1, PIRH2	RING finger and CHY zinc finger domain-containing protein 1 [EC:2.3.2.27]	ko04115	p53 signaling pathway	http://www.kegg.jp/kegg-bin/show_pathway?ko04115+K10144
Q96PM5	K10144	RCHY1, PIRH2	RING finger and CHY zinc finger domain-containing protein 1 [EC:2.3.2.27]	ko04120	Ubiquitin mediated proteolysis	http://www.kegg.jp/kegg-bin/show_pathway?ko04120+K10144
Q96PM5	K10144	RCHY1, PIRH2	RING finger and CHY zinc finger domain-containing protein 1 [EC:2.3.2.27]	ko05162	Measles	http://www.kegg.jp/kegg-bin/show_pathway?ko05162+K10144
Q9UHN6	K22144	TEME2	cell surface hyaluronidase [EC:3.2.1.35]
P09467	K03841	FBP, fbp	fructose-1,6-bisphosphatase I [EC:3.1.3.11]	ko00010	Glycolysis / Gluconeogenesis	http://www.kegg.jp/kegg-bin/show_pathway?ko00010+K03841
P09467	K03841	FBP, fbp	fructose-1,6-bisphosphatase I [EC:3.1.3.11]	ko00030	Pentose phosphate pathway	http://www.kegg.jp/kegg-bin/show_pathway?ko00030+K03841
P09467	K03841	FBP, fbp	fructose-1,6-bisphosphatase I [EC:3.1.3.11]	ko00051	Fructose and mannose metabolism	http://www.kegg.jp/kegg-bin/show_pathway?ko00051+K03841
P09467	K03841	FBP, fbp	fructose-1,6-bisphosphatase I [EC:3.1.3.11]	ko00680	Methane metabolism	http://www.kegg.jp/kegg-bin/show_pathway?ko00680+K03841
P09467	K03841	FBP, fbp	fructose-1,6-bisphosphatase I [EC:3.1.3.11]	ko00710	Carbon fixation in photosynthetic organisms	http://www.kegg.jp/kegg-bin/show_pathway?ko00710+K03841
P09467	K03841	FBP, fbp	fructose-1,6-bisphosphatase I [EC:3.1.3.11]	ko01100	Metabolic pathways	http://www.kegg.jp/kegg-bin/show_pathway?ko01100+K03841
P09467	K03841	FBP, fbp	fructose-1,6-bisphosphatase I [EC:3.1.3.11]	ko01110	Biosynthesis of secondary metabolites	http://www.kegg.jp/kegg-bin/show_pathway?ko01110+K03841
P09467	K03841	FBP, fbp	fructose-1,6-bisphosphatase I [EC:3.1.3.11]	ko01120	Microbial metabolism in diverse environments	http://www.kegg.jp/kegg-bin/show_pathway?ko01120+K03841
P09467	K03841	FBP, fbp	fructose-1,6-bisphosphatase I [EC:3.1.3.11]	ko01200	Carbon metabolism	http://www.kegg.jp/kegg-bin/show_pathway?ko01200+K03841
P09467	K03841	FBP, fbp	fructose-1,6-bisphosphatase I [EC:3.1.3.11]	ko04152	AMPK signaling pathway	http://www.kegg.jp/kegg-bin/show_pathway?ko04152+K03841
P09467	K03841	FBP, fbp	fructose-1,6-bisphosphatase I [EC:3.1.3.11]	ko04910	Insulin signaling pathway	http://www.kegg.jp/kegg-bin/show_pathway?ko04910+K03841
P09467	K03841	FBP, fbp	fructose-1,6-bisphosphatase I [EC:3.1.3.11]	ko04922	Glucagon signaling pathway	http://www.kegg.jp/kegg-bin/show_pathway?ko04922+K03841
Q15067	K00232	E1.3.3.6, ACOX1, ACOX3	acyl-CoA oxidase [EC:1.3.3.6]	ko00071	Fatty acid degradation	http://www.kegg.jp/kegg-bin/show_pathway?ko00071+K00232
Q15067	K00232	E1.3.3.6, ACOX1, ACOX3	acyl-CoA oxidase [EC:1.3.3.6]	ko00410	beta-Alanine metabolism	http://www.kegg.jp/kegg-bin/show_pathway?ko00410+K00232
Q15067	K00232	E1.3.3.6, ACOX1, ACOX3	acyl-CoA oxidase [EC:1.3.3.6]	ko00592	alpha-Linolenic acid metabolism	http://www.kegg.jp/kegg-bin/show_pathway?ko00592+K00232
Q15067	K00232	E1.3.3.6, ACOX1, ACOX3	acyl-CoA oxidase [EC:1.3.3.6]	ko00640	Propanoate metabolism	http://www.kegg.jp/kegg-bin/show_pathway?ko00640+K00232
Q15067	K00232	E1.3.3.6, ACOX1, ACOX3	acyl-CoA oxidase [EC:1.3.3.6]	ko01040	Biosynthesis of unsaturated fatty acids	http://www.kegg.jp/kegg-bin/show_pathway?ko01040+K00232
Q15067	K00232	E1.3.3.6, ACOX1, ACOX3	acyl-CoA oxidase [EC:1.3.3.6]	ko01100	Metabolic pathways	http://www.kegg.jp/kegg-bin/show_pathway?ko01100+K00232
Q15067	K00232	E1.3.3.6, ACOX1, ACOX3	acyl-CoA oxidase [EC:1.3.3.6]	ko01110	Biosynthesis of secondary metabolites	http://www.kegg.jp/kegg-bin/show_pathway?ko01110+K00232
Q15067	K00232	E1.3.3.6, ACOX1, ACOX3	acyl-CoA oxidase [EC:1.3.3.6]	ko01200	Carbon metabolism	http://www.kegg.jp/kegg-bin/show_pathway?ko01200+K00232
Q15067	K00232	E1.3.3.6, ACOX1, ACOX3	acyl-CoA oxidase [EC:1.3.3.6]	ko01212	Fatty acid metabolism	http://www.kegg.jp/kegg-bin/show_pathway?ko01212+K00232
Q15067	K00232	E1.3.3.6, ACOX1, ACOX3	acyl-CoA oxidase [EC:1.3.3.6]	ko03320	PPAR signaling pathway	http://www.kegg.jp/kegg-bin/show_pathway?ko03320+K00232
Q15067	K00232	E1.3.3.6, ACOX1, ACOX3	acyl-CoA oxidase [EC:1.3.3.6]	ko04024	cAMP signaling pathway	http://www.kegg.jp/kegg-bin/show_pathway?ko04024+K00232
Q15067	K00232	E1.3.3.6, ACOX1, ACOX3	acyl-CoA oxidase [EC:1.3.3.6]	ko04146	Peroxisome	http://www.kegg.jp/kegg-bin/show_pathway?ko04146+K00232
Q9BZM5	K07986	ULBP	UL16 binding protein	ko04650	Natural killer cell mediated cytotoxicity	http://www.kegg.jp/kegg-bin/show_pathway?ko04650+K07986
P30622	K10421	CLIP1, RSN	CAP-Gly domain-containing linker protein 1	ko04150	mTOR signaling pathway	http://www.kegg.jp/kegg-bin/show_pathway?ko04150+K10421
P32456	K20897	GBP2	guanylate-binding protein 2	ko04621	NOD-like receptor signaling pathway	http://www.kegg.jp/kegg-bin/show_pathway?ko04621+K20897
P08134	K07857	RHOC	Ras homolog gene family, member C
Q9P0R6
O60831	K20392	PRAF2	PRA1 family protein 2
Q9UI15	K20526	TAGLN	transgelin
P42345	K07203	MTOR, FRAP, TOR	serine/threonine-protein kinase mTOR [EC:2.7.11.1]	ko01521	EGFR tyrosine kinase inhibitor resistance	http://www.kegg.jp/kegg-bin/show_pathway?ko01521+K07203
P42345	K07203	MTOR, FRAP, TOR	serine/threonine-protein kinase mTOR [EC:2.7.11.1]	ko01522	Endocrine resistance	http://www.kegg.jp/kegg-bin/show_pathway?ko01522+K07203
P42345	K07203	MTOR, FRAP, TOR	serine/threonine-protein kinase mTOR [EC:2.7.11.1]	ko04012	ErbB signaling pathway	http://www.kegg.jp/kegg-bin/show_pathway?ko04012+K07203
P42345	K07203	MTOR, FRAP, TOR	serine/threonine-protein kinase mTOR [EC:2.7.11.1]	ko04066	HIF-1 signaling pathway	http://www.kegg.jp/kegg-bin/show_pathway?ko04066+K07203
P42345	K07203	MTOR, FRAP, TOR	serine/threonine-protein kinase mTOR [EC:2.7.11.1]	ko04072	Phospholipase D signaling pathway	http://www.kegg.jp/kegg-bin/show_pathway?ko04072+K07203
P42345	K07203	MTOR, FRAP, TOR	serine/threonine-protein kinase mTOR [EC:2.7.11.1]	ko04113	Meiosis - yeast	http://www.kegg.jp/kegg-bin/show_pathway?ko04113+K07203
P42345	K07203	MTOR, FRAP, TOR	serine/threonine-protein kinase mTOR [EC:2.7.11.1]	ko04136	Autophagy - other	http://www.kegg.jp/kegg-bin/show_pathway?ko04136+K07203
P42345	K07203	MTOR, FRAP, TOR	serine/threonine-protein kinase mTOR [EC:2.7.11.1]	ko04138	Autophagy - yeast	http://www.kegg.jp/kegg-bin/show_pathway?ko04138+K07203
P42345	K07203	MTOR, FRAP, TOR	serine/threonine-protein kinase mTOR [EC:2.7.11.1]	ko04139	Mitophagy - yeast	http://www.kegg.jp/kegg-bin/show_pathway?ko04139+K07203
P42345	K07203	MTOR, FRAP, TOR	serine/threonine-protein kinase mTOR [EC:2.7.11.1]	ko04140	Autophagy - animal	http://www.kegg.jp/kegg-bin/show_pathway?ko04140+K07203
P42345	K07203	MTOR, FRAP, TOR	serine/threonine-protein kinase mTOR [EC:2.7.11.1]	ko04150	mTOR signaling pathway	http://www.kegg.jp/kegg-bin/show_pathway?ko04150+K07203
P42345	K07203	MTOR, FRAP, TOR	serine/threonine-protein kinase mTOR [EC:2.7.11.1]	ko04151	PI3K-Akt signaling pathway	http://www.kegg.jp/kegg-bin/show_pathway?ko04151+K07203
P42345	K07203	MTOR, FRAP, TOR	serine/threonine-protein kinase mTOR [EC:2.7.11.1]	ko04152	AMPK signaling pathway	http://www.kegg.jp/kegg-bin/show_pathway?ko04152+K07203
P42345	K07203	MTOR, FRAP, TOR	serine/threonine-protein kinase mTOR [EC:2.7.11.1]	ko04211	Longevity regulating pathway	http://www.kegg.jp/kegg-bin/show_pathway?ko04211+K07203
P42345	K07203	MTOR, FRAP, TOR	serine/threonine-protein kinase mTOR [EC:2.7.11.1]	ko04212	Longevity regulating pathway - worm	http://www.kegg.jp/kegg-bin/show_pathway?ko04212+K07203
P42345	K07203	MTOR, FRAP, TOR	serine/threonine-protein kinase mTOR [EC:2.7.11.1]	ko04213	Longevity regulating pathway - multiple species	http://www.kegg.jp/kegg-bin/show_pathway?ko04213+K07203
P42345	K07203	MTOR, FRAP, TOR	serine/threonine-protein kinase mTOR [EC:2.7.11.1]	ko04218	Cellular senescence	http://www.kegg.jp/kegg-bin/show_pathway?ko04218+K07203
P42345	K07203	MTOR, FRAP, TOR	serine/threonine-protein kinase mTOR [EC:2.7.11.1]	ko04361	Axon regeneration	http://www.kegg.jp/kegg-bin/show_pathway?ko04361+K07203
P42345	K07203	MTOR, FRAP, TOR	serine/threonine-protein kinase mTOR [EC:2.7.11.1]	ko04371	Apelin signaling pathway	http://www.kegg.jp/kegg-bin/show_pathway?ko04371+K07203
P42345	K07203	MTOR, FRAP, TOR	serine/threonine-protein kinase mTOR [EC:2.7.11.1]	ko04630	JAK-STAT signaling pathway	http://www.kegg.jp/kegg-bin/show_pathway?ko04630+K07203
P42345	K07203	MTOR, FRAP, TOR	serine/threonine-protein kinase mTOR [EC:2.7.11.1]	ko04659	Th17 cell differentiation	http://www.kegg.jp/kegg-bin/show_pathway?ko04659+K07203
P42345	K07203	MTOR, FRAP, TOR	serine/threonine-protein kinase mTOR [EC:2.7.11.1]	ko04714	Thermogenesis	http://www.kegg.jp/kegg-bin/show_pathway?ko04714+K07203
P42345	K07203	MTOR, FRAP, TOR	serine/threonine-protein kinase mTOR [EC:2.7.11.1]	ko04910	Insulin signaling pathway	http://www.kegg.jp/kegg-bin/show_pathway?ko04910+K07203
P42345	K07203	MTOR, FRAP, TOR	serine/threonine-protein kinase mTOR [EC:2.7.11.1]	ko04919	Thyroid hormone signaling pathway	http://www.kegg.jp/kegg-bin/show_pathway?ko04919+K07203
P42345	K07203	MTOR, FRAP, TOR	serine/threonine-protein kinase mTOR [EC:2.7.11.1]	ko04920	Adipocytokine signaling pathway	http://www.kegg.jp/kegg-bin/show_pathway?ko04920+K07203
P42345	K07203	MTOR, FRAP, TOR	serine/threonine-protein kinase mTOR [EC:2.7.11.1]	ko04930	Type II diabetes mellitus	http://www.kegg.jp/kegg-bin/show_pathway?ko04930+K07203
P42345	K07203	MTOR, FRAP, TOR	serine/threonine-protein kinase mTOR [EC:2.7.11.1]	ko04931	Insulin resistance	http://www.kegg.jp/kegg-bin/show_pathway?ko04931+K07203
P42345	K07203	MTOR, FRAP, TOR	serine/threonine-protein kinase mTOR [EC:2.7.11.1]	ko04935	Growth hormone synthesis, secretion and action	http://www.kegg.jp/kegg-bin/show_pathway?ko04935+K07203
P42345	K07203	MTOR, FRAP, TOR	serine/threonine-protein kinase mTOR [EC:2.7.11.1]	ko05010	Alzheimer disease	http://www.kegg.jp/kegg-bin/show_pathway?ko05010+K07203
P42345	K07203	MTOR, FRAP, TOR	serine/threonine-protein kinase mTOR [EC:2.7.11.1]	ko05016	Huntington disease	http://www.kegg.jp/kegg-bin/show_pathway?ko05016+K07203
P42345	K07203	MTOR, FRAP, TOR	serine/threonine-protein kinase mTOR [EC:2.7.11.1]	ko05017	Spinocerebellar ataxia	http://www.kegg.jp/kegg-bin/show_pathway?ko05017+K07203
P42345	K07203	MTOR, FRAP, TOR	serine/threonine-protein kinase mTOR [EC:2.7.11.1]	ko05131	Shigellosis	http://www.kegg.jp/kegg-bin/show_pathway?ko05131+K07203
P42345	K07203	MTOR, FRAP, TOR	serine/threonine-protein kinase mTOR [EC:2.7.11.1]	ko05163	Human cytomegalovirus infection	http://www.kegg.jp/kegg-bin/show_pathway?ko05163+K07203
P42345	K07203	MTOR, FRAP, TOR	serine/threonine-protein kinase mTOR [EC:2.7.11.1]	ko05165	Human papillomavirus infection	http://www.kegg.jp/kegg-bin/show_pathway?ko05165+K07203
P42345	K07203	MTOR, FRAP, TOR	serine/threonine-protein kinase mTOR [EC:2.7.11.1]	ko05167	Kaposi sarcoma-associated herpesvirus infection	http://www.kegg.jp/kegg-bin/show_pathway?ko05167+K07203
P42345	K07203	MTOR, FRAP, TOR	serine/threonine-protein kinase mTOR [EC:2.7.11.1]	ko05168	Herpes simplex virus 1 infection	http://www.kegg.jp/kegg-bin/show_pathway?ko05168+K07203
P42345	K07203	MTOR, FRAP, TOR	serine/threonine-protein kinase mTOR [EC:2.7.11.1]	ko05170	Human immunodeficiency virus 1 infection	http://www.kegg.jp/kegg-bin/show_pathway?ko05170+K07203
P42345	K07203	MTOR, FRAP, TOR	serine/threonine-protein kinase mTOR [EC:2.7.11.1]	ko05200	Pathways in cancer	http://www.kegg.jp/kegg-bin/show_pathway?ko05200+K07203
P42345	K07203	MTOR, FRAP, TOR	serine/threonine-protein kinase mTOR [EC:2.7.11.1]	ko05205	Proteoglycans in cancer	http://www.kegg.jp/kegg-bin/show_pathway?ko05205+K07203
P42345	K07203	MTOR, FRAP, TOR	serine/threonine-protein kinase mTOR [EC:2.7.11.1]	ko05206	MicroRNAs in cancer	http://www.kegg.jp/kegg-bin/show_pathway?ko05206+K07203
P42345	K07203	MTOR, FRAP, TOR	serine/threonine-protein kinase mTOR [EC:2.7.11.1]	ko05210	Colorectal cancer	http://www.kegg.jp/kegg-bin/show_pathway?ko05210+K07203
P42345	K07203	MTOR, FRAP, TOR	serine/threonine-protein kinase mTOR [EC:2.7.11.1]	ko05212	Pancreatic cancer	http://www.kegg.jp/kegg-bin/show_pathway?ko05212+K07203
P42345	K07203	MTOR, FRAP, TOR	serine/threonine-protein kinase mTOR [EC:2.7.11.1]	ko05214	Glioma	http://www.kegg.jp/kegg-bin/show_pathway?ko05214+K07203
P42345	K07203	MTOR, FRAP, TOR	serine/threonine-protein kinase mTOR [EC:2.7.11.1]	ko05215	Prostate cancer	http://www.kegg.jp/kegg-bin/show_pathway?ko05215+K07203
P42345	K07203	MTOR, FRAP, TOR	serine/threonine-protein kinase mTOR [EC:2.7.11.1]	ko05221	Acute myeloid leukemia	http://www.kegg.jp/kegg-bin/show_pathway?ko05221+K07203
P42345	K07203	MTOR, FRAP, TOR	serine/threonine-protein kinase mTOR [EC:2.7.11.1]	ko05224	Breast cancer	http://www.kegg.jp/kegg-bin/show_pathway?ko05224+K07203
P42345	K07203	MTOR, FRAP, TOR	serine/threonine-protein kinase mTOR [EC:2.7.11.1]	ko05225	Hepatocellular carcinoma	http://www.kegg.jp/kegg-bin/show_pathway?ko05225+K07203
P42345	K07203	MTOR, FRAP, TOR	serine/threonine-protein kinase mTOR [EC:2.7.11.1]	ko05226	Gastric cancer	http://www.kegg.jp/kegg-bin/show_pathway?ko05226+K07203
P42345	K07203	MTOR, FRAP, TOR	serine/threonine-protein kinase mTOR [EC:2.7.11.1]	ko05230	Central carbon metabolism in cancer	http://www.kegg.jp/kegg-bin/show_pathway?ko05230+K07203
P42345	K07203	MTOR, FRAP, TOR	serine/threonine-protein kinase mTOR [EC:2.7.11.1]	ko05231	Choline metabolism in cancer	http://www.kegg.jp/kegg-bin/show_pathway?ko05231+K07203
P42345	K07203	MTOR, FRAP, TOR	serine/threonine-protein kinase mTOR [EC:2.7.11.1]	ko05235	PD-L1 expression and PD-1 checkpoint pathway in cancer	http://www.kegg.jp/kegg-bin/show_pathway?ko05235+K07203
Q08722	K06266	CD47	CD47 antigen (Rh-related antigen, integrin-associated signal transducer)	ko04512	ECM-receptor interaction	http://www.kegg.jp/kegg-bin/show_pathway?ko04512+K06266
Q12846	K13502	STX4	syntaxin 4	ko04130	SNARE interactions in vesicular transport	http://www.kegg.jp/kegg-bin/show_pathway?ko04130+K13502
Q12846	K13502	STX4	syntaxin 4	ko04962	Vasopressin-regulated water reabsorption	http://www.kegg.jp/kegg-bin/show_pathway?ko04962+K13502
P17813	K06526	ENG, CD105	endoglin
Q9UK22	K10099	FBXO2, NFB42	F-box protein 2	ko04120	Ubiquitin mediated proteolysis	http://www.kegg.jp/kegg-bin/show_pathway?ko04120+K10099
Q9UK22	K10099	FBXO2, NFB42	F-box protein 2	ko04141	Protein processing in endoplasmic reticulum	http://www.kegg.jp/kegg-bin/show_pathway?ko04141+K10099
Q969E2	K19995	SCAMP	secretory carrier-associated membrane protein
Q9Y3R5
O95716	K07884	RAB3D	Ras-related protein Rab-3D	ko04972	Pancreatic secretion	http://www.kegg.jp/kegg-bin/show_pathway?ko04972+K07884
Q13637	K07918	RAB32	Ras-related protein Rab-32
Q03519	K05654	ABCB3, TAP2	ATP-binding cassette, subfamily B (MDR/TAP), member 3	ko02010	ABC transporters	http://www.kegg.jp/kegg-bin/show_pathway?ko02010+K05654
Q03519	K05654	ABCB3, TAP2	ATP-binding cassette, subfamily B (MDR/TAP), member 3	ko04145	Phagosome	http://www.kegg.jp/kegg-bin/show_pathway?ko04145+K05654
Q03519	K05654	ABCB3, TAP2	ATP-binding cassette, subfamily B (MDR/TAP), member 3	ko04612	Antigen processing and presentation	http://www.kegg.jp/kegg-bin/show_pathway?ko04612+K05654
Q03519	K05654	ABCB3, TAP2	ATP-binding cassette, subfamily B (MDR/TAP), member 3	ko05163	Human cytomegalovirus infection	http://www.kegg.jp/kegg-bin/show_pathway?ko05163+K05654
Q03519	K05654	ABCB3, TAP2	ATP-binding cassette, subfamily B (MDR/TAP), member 3	ko05168	Herpes simplex virus 1 infection	http://www.kegg.jp/kegg-bin/show_pathway?ko05168+K05654
Q03519	K05654	ABCB3, TAP2	ATP-binding cassette, subfamily B (MDR/TAP), member 3	ko05169	Epstein-Barr virus infection	http://www.kegg.jp/kegg-bin/show_pathway?ko05169+K05654
Q03519	K05654	ABCB3, TAP2	ATP-binding cassette, subfamily B (MDR/TAP), member 3	ko05170	Human immunodeficiency virus 1 infection	http://www.kegg.jp/kegg-bin/show_pathway?ko05170+K05654
Q03519	K05654	ABCB3, TAP2	ATP-binding cassette, subfamily B (MDR/TAP), member 3	ko05340	Primary immunodeficiency	http://www.kegg.jp/kegg-bin/show_pathway?ko05340+K05654
Q9P2C4
Q15155
O95786	K12646	DDX58, RIG-I	ATP-dependent RNA helicase DDX58 [EC:3.6.4.13]	ko04064	NF-kappa B signaling pathway	http://www.kegg.jp/kegg-bin/show_pathway?ko04064+K12646
O95786	K12646	DDX58, RIG-I	ATP-dependent RNA helicase DDX58 [EC:3.6.4.13]	ko04622	RIG-I-like receptor signaling pathway	http://www.kegg.jp/kegg-bin/show_pathway?ko04622+K12646
O95786	K12646	DDX58, RIG-I	ATP-dependent RNA helicase DDX58 [EC:3.6.4.13]	ko04623	Cytosolic DNA-sensing pathway	http://www.kegg.jp/kegg-bin/show_pathway?ko04623+K12646
O95786	K12646	DDX58, RIG-I	ATP-dependent RNA helicase DDX58 [EC:3.6.4.13]	ko05160	Hepatitis C	http://www.kegg.jp/kegg-bin/show_pathway?ko05160+K12646
O95786	K12646	DDX58, RIG-I	ATP-dependent RNA helicase DDX58 [EC:3.6.4.13]	ko05161	Hepatitis B	http://www.kegg.jp/kegg-bin/show_pathway?ko05161+K12646
O95786	K12646	DDX58, RIG-I	ATP-dependent RNA helicase DDX58 [EC:3.6.4.13]	ko05162	Measles	http://www.kegg.jp/kegg-bin/show_pathway?ko05162+K12646
O95786	K12646	DDX58, RIG-I	ATP-dependent RNA helicase DDX58 [EC:3.6.4.13]	ko05164	Influenza A	http://www.kegg.jp/kegg-bin/show_pathway?ko05164+K12646
O95786	K12646	DDX58, RIG-I	ATP-dependent RNA helicase DDX58 [EC:3.6.4.13]	ko05168	Herpes simplex virus 1 infection	http://www.kegg.jp/kegg-bin/show_pathway?ko05168+K12646
O95786	K12646	DDX58, RIG-I	ATP-dependent RNA helicase DDX58 [EC:3.6.4.13]	ko05169	Epstein-Barr virus infection	http://www.kegg.jp/kegg-bin/show_pathway?ko05169+K12646
O43278	K15619	SPINT1	Kunitz-type protease inhibitor 1	ko05202	Transcriptional misregulation in cancer	http://www.kegg.jp/kegg-bin/show_pathway?ko05202+K15619
O43278	K15619	SPINT1	Kunitz-type protease inhibitor 1	ko05215	Prostate cancer	http://www.kegg.jp/kegg-bin/show_pathway?ko05215+K15619
Q01484	K10380	ANK	ankyrin	ko04624	Toll and Imd signaling pathway	http://www.kegg.jp/kegg-bin/show_pathway?ko04624+K10380
Q01484	K10380	ANK	ankyrin	ko05205	Proteoglycans in cancer	http://www.kegg.jp/kegg-bin/show_pathway?ko05205+K10380
Q99584	Q99584
Q9NYM9	K08504	BET1	blocked early in transport 1	ko04130	SNARE interactions in vesicular transport	http://www.kegg.jp/kegg-bin/show_pathway?ko04130+K08504
Q6L8Q7	K19612	PDE12	2',5'-phosphodiesterase [EC:3.1.13.4 3.1.4.-]
Q16698	K13236	DECR1	2,4-dienoyl-CoA reductase, mitochondrial [EC:1.3.1.34]
Q9NQY0	K20120	BIN3	bridging integrator 3
Q6NXT6	K23404	TAPT1	transmembrane anterior posterior transformation protein 1
P08648	K06484	ITGA5, CD49e	integrin alpha 5	ko04145	Phagosome	http://www.kegg.jp/kegg-bin/show_pathway?ko04145+K06484
P08648	K06484	ITGA5, CD49e	integrin alpha 5	ko04151	PI3K-Akt signaling pathway	http://www.kegg.jp/kegg-bin/show_pathway?ko04151+K06484
P08648	K06484	ITGA5, CD49e	integrin alpha 5	ko04510	Focal adhesion	http://www.kegg.jp/kegg-bin/show_pathway?ko04510+K06484
P08648	K06484	ITGA5, CD49e	integrin alpha 5	ko04512	ECM-receptor interaction	http://www.kegg.jp/kegg-bin/show_pathway?ko04512+K06484
P08648	K06484	ITGA5, CD49e	integrin alpha 5	ko04640	Hematopoietic cell lineage	http://www.kegg.jp/kegg-bin/show_pathway?ko04640+K06484
P08648	K06484	ITGA5, CD49e	integrin alpha 5	ko04810	Regulation of actin cytoskeleton	http://www.kegg.jp/kegg-bin/show_pathway?ko04810+K06484
P08648	K06484	ITGA5, CD49e	integrin alpha 5	ko05100	Bacterial invasion of epithelial cells	http://www.kegg.jp/kegg-bin/show_pathway?ko05100+K06484
P08648	K06484	ITGA5, CD49e	integrin alpha 5	ko05131	Shigellosis	http://www.kegg.jp/kegg-bin/show_pathway?ko05131+K06484
P08648	K06484	ITGA5, CD49e	integrin alpha 5	ko05133	Pertussis	http://www.kegg.jp/kegg-bin/show_pathway?ko05133+K06484
P08648	K06484	ITGA5, CD49e	integrin alpha 5	ko05135	Yersinia infection	http://www.kegg.jp/kegg-bin/show_pathway?ko05135+K06484
P08648	K06484	ITGA5, CD49e	integrin alpha 5	ko05165	Human papillomavirus infection	http://www.kegg.jp/kegg-bin/show_pathway?ko05165+K06484
P08648	K06484	ITGA5, CD49e	integrin alpha 5	ko05168	Herpes simplex virus 1 infection	http://www.kegg.jp/kegg-bin/show_pathway?ko05168+K06484
P08648	K06484	ITGA5, CD49e	integrin alpha 5	ko05205	Proteoglycans in cancer	http://www.kegg.jp/kegg-bin/show_pathway?ko05205+K06484
P08648	K06484	ITGA5, CD49e	integrin alpha 5	ko05206	MicroRNAs in cancer	http://www.kegg.jp/kegg-bin/show_pathway?ko05206+K06484
P08648	K06484	ITGA5, CD49e	integrin alpha 5	ko05410	Hypertrophic cardiomyopathy (HCM)	http://www.kegg.jp/kegg-bin/show_pathway?ko05410+K06484
P08648	K06484	ITGA5, CD49e	integrin alpha 5	ko05412	Arrhythmogenic right ventricular cardiomyopathy (ARVC)	http://www.kegg.jp/kegg-bin/show_pathway?ko05412+K06484
P08648	K06484	ITGA5, CD49e	integrin alpha 5	ko05414	Dilated cardiomyopathy (DCM)	http://www.kegg.jp/kegg-bin/show_pathway?ko05414+K06484
P54852
O14966	K07916	RAB7L1, RAB7L	Ras-related protein Rab-7L1
Q9UBR5
Q5NDL2	K18134	EOGT	EGF domain-specific O-GlcNAc transferase [EC:2.4.1.255]	ko00514	Other types of O-glycan biosynthesis	http://www.kegg.jp/kegg-bin/show_pathway?ko00514+K18134
Q15005	K12947	SPCS2, SPC2	signal peptidase complex subunit 2 [EC:3.4.-.-]	ko03060	Protein export	http://www.kegg.jp/kegg-bin/show_pathway?ko03060+K12947
Q9NZ45	K23885	CISD1	CDGSH iron-sulfur domain-containing protein 1
O95297	K06770	MPZ	myelin protein zero	ko04514	Cell adhesion molecules (CAMs)	http://www.kegg.jp/kegg-bin/show_pathway?ko04514+K06770
Q9Y2Q9	K17407	MRPS28	small subunit ribosomal protein S28
O43169	K23490	CYB5	cytochrome b5
Q15629	K14010	TRAM1	translocating chain-associated membrane protein 1	ko04141	Protein processing in endoplasmic reticulum	http://www.kegg.jp/kegg-bin/show_pathway?ko04141+K14010
Q9NVV0
Q9NRX4	K01112	PHPT1	phosphohistidine phosphatase [EC:3.9.1.3]
P07203	K00432	gpx, btuE, bsaA	glutathione peroxidase [EC:1.11.1.9]	ko00480	Glutathione metabolism	http://www.kegg.jp/kegg-bin/show_pathway?ko00480+K00432
P07203	K00432	gpx, btuE, bsaA	glutathione peroxidase [EC:1.11.1.9]	ko00590	Arachidonic acid metabolism	http://www.kegg.jp/kegg-bin/show_pathway?ko00590+K00432
P07203	K00432	gpx, btuE, bsaA	glutathione peroxidase [EC:1.11.1.9]	ko01100	Metabolic pathways	http://www.kegg.jp/kegg-bin/show_pathway?ko01100+K00432
P07203	K00432	gpx, btuE, bsaA	glutathione peroxidase [EC:1.11.1.9]	ko04918	Thyroid hormone synthesis	http://www.kegg.jp/kegg-bin/show_pathway?ko04918+K00432
P07203	K00432	gpx, btuE, bsaA	glutathione peroxidase [EC:1.11.1.9]	ko05014	Amyotrophic lateral sclerosis (ALS)	http://www.kegg.jp/kegg-bin/show_pathway?ko05014+K00432
P07203	K00432	gpx, btuE, bsaA	glutathione peroxidase [EC:1.11.1.9]	ko05016	Huntington disease	http://www.kegg.jp/kegg-bin/show_pathway?ko05016+K00432
Q1KMD3
O43657	K17295	TSPAN6	tetraspanin-6
Q96CD0	K10274	FBXL8	F-box and leucine-rich repeat protein 8
Q13753	K06246	LAMC2	laminin, gamma 2	ko04151	PI3K-Akt signaling pathway	http://www.kegg.jp/kegg-bin/show_pathway?ko04151+K06246
Q13753	K06246	LAMC2	laminin, gamma 2	ko04510	Focal adhesion	http://www.kegg.jp/kegg-bin/show_pathway?ko04510+K06246
Q13753	K06246	LAMC2	laminin, gamma 2	ko04512	ECM-receptor interaction	http://www.kegg.jp/kegg-bin/show_pathway?ko04512+K06246
Q13753	K06246	LAMC2	laminin, gamma 2	ko05145	Toxoplasmosis	http://www.kegg.jp/kegg-bin/show_pathway?ko05145+K06246
Q13753	K06246	LAMC2	laminin, gamma 2	ko05146	Amoebiasis	http://www.kegg.jp/kegg-bin/show_pathway?ko05146+K06246
Q13753	K06246	LAMC2	laminin, gamma 2	ko05165	Human papillomavirus infection	http://www.kegg.jp/kegg-bin/show_pathway?ko05165+K06246
Q13753	K06246	LAMC2	laminin, gamma 2	ko05200	Pathways in cancer	http://www.kegg.jp/kegg-bin/show_pathway?ko05200+K06246
Q13753	K06246	LAMC2	laminin, gamma 2	ko05222	Small cell lung cancer	http://www.kegg.jp/kegg-bin/show_pathway?ko05222+K06246
Q5VT79	K17096	ANXA8	annexin A8
P49459	K10573	UBE2A, UBC2, RAD6A	ubiquitin-conjugating enzyme E2 A [EC:2.3.2.23]	ko04120	Ubiquitin mediated proteolysis	http://www.kegg.jp/kegg-bin/show_pathway?ko04120+K10573
Q7Z5G4
P01889	K06751	MHC1	MHC class I antigen	ko04144	Endocytosis	http://www.kegg.jp/kegg-bin/show_pathway?ko04144+K06751
P01889	K06751	MHC1	MHC class I antigen	ko04145	Phagosome	http://www.kegg.jp/kegg-bin/show_pathway?ko04145+K06751
P01889	K06751	MHC1	MHC class I antigen	ko04218	Cellular senescence	http://www.kegg.jp/kegg-bin/show_pathway?ko04218+K06751
P01889	K06751	MHC1	MHC class I antigen	ko04514	Cell adhesion molecules (CAMs)	http://www.kegg.jp/kegg-bin/show_pathway?ko04514+K06751
P01889	K06751	MHC1	MHC class I antigen	ko04612	Antigen processing and presentation	http://www.kegg.jp/kegg-bin/show_pathway?ko04612+K06751
P01889	K06751	MHC1	MHC class I antigen	ko04940	Type I diabetes mellitus	http://www.kegg.jp/kegg-bin/show_pathway?ko04940+K06751
P01889	K06751	MHC1	MHC class I antigen	ko05163	Human cytomegalovirus infection	http://www.kegg.jp/kegg-bin/show_pathway?ko05163+K06751
P01889	K06751	MHC1	MHC class I antigen	ko05165	Human papillomavirus infection	http://www.kegg.jp/kegg-bin/show_pathway?ko05165+K06751
P01889	K06751	MHC1	MHC class I antigen	ko05166	Human T-cell leukemia virus 1 infection	http://www.kegg.jp/kegg-bin/show_pathway?ko05166+K06751
P01889	K06751	MHC1	MHC class I antigen	ko05167	Kaposi sarcoma-associated herpesvirus infection	http://www.kegg.jp/kegg-bin/show_pathway?ko05167+K06751
P01889	K06751	MHC1	MHC class I antigen	ko05168	Herpes simplex virus 1 infection	http://www.kegg.jp/kegg-bin/show_pathway?ko05168+K06751
P01889	K06751	MHC1	MHC class I antigen	ko05169	Epstein-Barr virus infection	http://www.kegg.jp/kegg-bin/show_pathway?ko05169+K06751
P01889	K06751	MHC1	MHC class I antigen	ko05170	Human immunodeficiency virus 1 infection	http://www.kegg.jp/kegg-bin/show_pathway?ko05170+K06751
P01889	K06751	MHC1	MHC class I antigen	ko05203	Viral carcinogenesis	http://www.kegg.jp/kegg-bin/show_pathway?ko05203+K06751
P01889	K06751	MHC1	MHC class I antigen	ko05320	Autoimmune thyroid disease	http://www.kegg.jp/kegg-bin/show_pathway?ko05320+K06751
P01889	K06751	MHC1	MHC class I antigen	ko05330	Allograft rejection	http://www.kegg.jp/kegg-bin/show_pathway?ko05330+K06751
P01889	K06751	MHC1	MHC class I antigen	ko05332	Graft-versus-host disease	http://www.kegg.jp/kegg-bin/show_pathway?ko05332+K06751
P01889	K06751	MHC1	MHC class I antigen	ko05416	Viral myocarditis	http://www.kegg.jp/kegg-bin/show_pathway?ko05416+K06751
O00339
P07311	K01512	acyP	acylphosphatase [EC:3.6.1.7]	ko00620	Pyruvate metabolism	http://www.kegg.jp/kegg-bin/show_pathway?ko00620+K01512
P07311	K01512	acyP	acylphosphatase [EC:3.6.1.7]	ko00627	Aminobenzoate degradation	http://www.kegg.jp/kegg-bin/show_pathway?ko00627+K01512
P07311	K01512	acyP	acylphosphatase [EC:3.6.1.7]	ko01100	Metabolic pathways	http://www.kegg.jp/kegg-bin/show_pathway?ko01100+K01512
P07311	K01512	acyP	acylphosphatase [EC:3.6.1.7]	ko01120	Microbial metabolism in diverse environments	http://www.kegg.jp/kegg-bin/show_pathway?ko01120+K01512
Q96RQ1	K20366	ERGIC2, ERV41	endoplasmic reticulum-Golgi intermediate compartment protein 2
P61916	K13443	NPC2	Niemann-Pick C2 protein	ko04142	Lysosome	http://www.kegg.jp/kegg-bin/show_pathway?ko04142+K13443
P61916	K13443	NPC2	Niemann-Pick C2 protein	ko04979	Cholesterol metabolism	http://www.kegg.jp/kegg-bin/show_pathway?ko04979+K13443
O94905	K23341	ERLIN	erlin
Q8N668	K22557	COMMD1, MURR1	COMM domain containing 1
Q9HAT2	K05970	SIAE	sialate O-acetylesterase [EC:3.1.1.53]
P16422	K06737	EPCAM, TACSTD1, CD326	epithelial cell adhesion molecule
Q01995	K20526	TAGLN	transgelin
Q99523	K12388	SORT1	sortilin	ko04142	Lysosome	http://www.kegg.jp/kegg-bin/show_pathway?ko04142+K12388
Q99523	K12388	SORT1	sortilin	ko04722	Neurotrophin signaling pathway	http://www.kegg.jp/kegg-bin/show_pathway?ko04722+K12388
Q99523	K12388	SORT1	sortilin	ko04979	Cholesterol metabolism	http://www.kegg.jp/kegg-bin/show_pathway?ko04979+K12388
Q9NP61	K12493	ARFGAP2_3	ADP-ribosylation factor GTPase-activating protein 2/3	ko04144	Endocytosis	http://www.kegg.jp/kegg-bin/show_pathway?ko04144+K12493
P15514	K09782	AREG	amphiregulin	ko04010	MAPK signaling pathway	http://www.kegg.jp/kegg-bin/show_pathway?ko04010+K09782
P15514	K09782	AREG	amphiregulin	ko04012	ErbB signaling pathway	http://www.kegg.jp/kegg-bin/show_pathway?ko04012+K09782
P15514	K09782	AREG	amphiregulin	ko04151	PI3K-Akt signaling pathway	http://www.kegg.jp/kegg-bin/show_pathway?ko04151+K09782
P15514	K09782	AREG	amphiregulin	ko04390	Hippo signaling pathway	http://www.kegg.jp/kegg-bin/show_pathway?ko04390+K09782
P15514	K09782	AREG	amphiregulin	ko05210	Colorectal cancer	http://www.kegg.jp/kegg-bin/show_pathway?ko05210+K09782
Q5K651
Q9H0E2	K05402	TOLLIP	toll-interacting protein	ko04620	Toll-like receptor signaling pathway	http://www.kegg.jp/kegg-bin/show_pathway?ko04620+K05402
Q96HJ9
Q9NRX6
P43155	K00624	E2.3.1.7	carnitine O-acetyltransferase [EC:2.3.1.7]	ko04146	Peroxisome	http://www.kegg.jp/kegg-bin/show_pathway?ko04146+K00624
Q13530	K23544	SERINC1_3	serine incorporator 1/3
Q9BRP8	K14294	WIBG, PYM	partner of Y14 and mago	ko03013	RNA transport	http://www.kegg.jp/kegg-bin/show_pathway?ko03013+K14294
Q9BRP8	K14294	WIBG, PYM	partner of Y14 and mago	ko03015	mRNA surveillance pathway	http://www.kegg.jp/kegg-bin/show_pathway?ko03015+K14294
P62341	K22366	SELENOT	thioredoxin reductase-like selenoprotein T
Q71U36	K07374	TUBA	tubulin alpha	ko04145	Phagosome	http://www.kegg.jp/kegg-bin/show_pathway?ko04145+K07374
Q71U36	K07374	TUBA	tubulin alpha	ko04210	Apoptosis	http://www.kegg.jp/kegg-bin/show_pathway?ko04210+K07374
Q71U36	K07374	TUBA	tubulin alpha	ko04530	Tight junction	http://www.kegg.jp/kegg-bin/show_pathway?ko04530+K07374
Q71U36	K07374	TUBA	tubulin alpha	ko04540	Gap junction	http://www.kegg.jp/kegg-bin/show_pathway?ko04540+K07374
Q71U36	K07374	TUBA	tubulin alpha	ko05010	Alzheimer disease	http://www.kegg.jp/kegg-bin/show_pathway?ko05010+K07374
Q71U36	K07374	TUBA	tubulin alpha	ko05016	Huntington disease	http://www.kegg.jp/kegg-bin/show_pathway?ko05016+K07374
Q71U36	K07374	TUBA	tubulin alpha	ko05130	Pathogenic Escherichia coli infection	http://www.kegg.jp/kegg-bin/show_pathway?ko05130+K07374
Q8NFF5	K00953	FLAD1	FAD synthetase [EC:2.7.7.2]	ko00740	Riboflavin metabolism	http://www.kegg.jp/kegg-bin/show_pathway?ko00740+K00953
Q8NFF5	K00953	FLAD1	FAD synthetase [EC:2.7.7.2]	ko01100	Metabolic pathways	http://www.kegg.jp/kegg-bin/show_pathway?ko01100+K00953
Q8NFF5	K00953	FLAD1	FAD synthetase [EC:2.7.7.2]	ko01110	Biosynthesis of secondary metabolites	http://www.kegg.jp/kegg-bin/show_pathway?ko01110+K00953
Q5VVQ6	K13719	OTU1, YOD1	ubiquitin thioesterase OTU1 [EC:3.1.2.-]	ko04141	Protein processing in endoplasmic reticulum	http://www.kegg.jp/kegg-bin/show_pathway?ko04141+K13719
P13987	K04008	CD59	CD59 antigen	ko04610	Complement and coagulation cascades	http://www.kegg.jp/kegg-bin/show_pathway?ko04610+K04008
P13987	K04008	CD59	CD59 antigen	ko04640	Hematopoietic cell lineage	http://www.kegg.jp/kegg-bin/show_pathway?ko04640+K04008
P28062	K02740	PSMB8, LMP7	20S proteasome subunit beta 8 [EC:3.4.25.1]	ko03050	Proteasome	http://www.kegg.jp/kegg-bin/show_pathway?ko03050+K02740
Q9BS40	K23594	LXN	latexin
P27487	K01278	DPP4, CD26	dipeptidyl-peptidase 4 [EC:3.4.14.5]	ko04974	Protein digestion and absorption	http://www.kegg.jp/kegg-bin/show_pathway?ko04974+K01278
Q6F5E8	K20493	LRRC16, CARMIL	leucine-rich repeat-containing protein 16
Q96DC9	K09603	OTUB2	ubiquitin thioesterase protein OTUB2 [EC:3.4.19.12]
Q9NVZ3	K20069	NECAP1_2	adaptin ear-binding coat-associated protein 1/2
Q9Y617	K00831	serC, PSAT1	phosphoserine aminotransferase [EC:2.6.1.52]	ko00260	Glycine, serine and threonine metabolism	http://www.kegg.jp/kegg-bin/show_pathway?ko00260+K00831
Q9Y617	K00831	serC, PSAT1	phosphoserine aminotransferase [EC:2.6.1.52]	ko00270	Cysteine and methionine metabolism	http://www.kegg.jp/kegg-bin/show_pathway?ko00270+K00831
Q9Y617	K00831	serC, PSAT1	phosphoserine aminotransferase [EC:2.6.1.52]	ko00680	Methane metabolism	http://www.kegg.jp/kegg-bin/show_pathway?ko00680+K00831
Q9Y617	K00831	serC, PSAT1	phosphoserine aminotransferase [EC:2.6.1.52]	ko00750	Vitamin B6 metabolism	http://www.kegg.jp/kegg-bin/show_pathway?ko00750+K00831
Q9Y617	K00831	serC, PSAT1	phosphoserine aminotransferase [EC:2.6.1.52]	ko01100	Metabolic pathways	http://www.kegg.jp/kegg-bin/show_pathway?ko01100+K00831
Q9Y617	K00831	serC, PSAT1	phosphoserine aminotransferase [EC:2.6.1.52]	ko01110	Biosynthesis of secondary metabolites	http://www.kegg.jp/kegg-bin/show_pathway?ko01110+K00831
Q9Y617	K00831	serC, PSAT1	phosphoserine aminotransferase [EC:2.6.1.52]	ko01120	Microbial metabolism in diverse environments	http://www.kegg.jp/kegg-bin/show_pathway?ko01120+K00831
Q9Y617	K00831	serC, PSAT1	phosphoserine aminotransferase [EC:2.6.1.52]	ko01200	Carbon metabolism	http://www.kegg.jp/kegg-bin/show_pathway?ko01200+K00831
Q9Y617	K00831	serC, PSAT1	phosphoserine aminotransferase [EC:2.6.1.52]	ko01230	Biosynthesis of amino acids	http://www.kegg.jp/kegg-bin/show_pathway?ko01230+K00831
Q96RT7	K16573	TUBGCP6, GCP6	gamma-tubulin complex component 6
P61604	K04078	groES, HSPE1	chaperonin GroES
Q5T1J5	K22758	CHCHD2	coiled-coil-helix-coiled-coil-helix domain-containing protein 2
P04049	K04366	RAF1	RAF proto-oncogene serine/threonine-protein kinase [EC:2.7.11.1]	ko01521	EGFR tyrosine kinase inhibitor resistance	http://www.kegg.jp/kegg-bin/show_pathway?ko01521+K04366
P04049	K04366	RAF1	RAF proto-oncogene serine/threonine-protein kinase [EC:2.7.11.1]	ko01522	Endocrine resistance	http://www.kegg.jp/kegg-bin/show_pathway?ko01522+K04366
P04049	K04366	RAF1	RAF proto-oncogene serine/threonine-protein kinase [EC:2.7.11.1]	ko04010	MAPK signaling pathway	http://www.kegg.jp/kegg-bin/show_pathway?ko04010+K04366
P04049	K04366	RAF1	RAF proto-oncogene serine/threonine-protein kinase [EC:2.7.11.1]	ko04012	ErbB signaling pathway	http://www.kegg.jp/kegg-bin/show_pathway?ko04012+K04366
P04049	K04366	RAF1	RAF proto-oncogene serine/threonine-protein kinase [EC:2.7.11.1]	ko04014	Ras signaling pathway	http://www.kegg.jp/kegg-bin/show_pathway?ko04014+K04366
P04049	K04366	RAF1	RAF proto-oncogene serine/threonine-protein kinase [EC:2.7.11.1]	ko04015	Rap1 signaling pathway	http://www.kegg.jp/kegg-bin/show_pathway?ko04015+K04366
P04049	K04366	RAF1	RAF proto-oncogene serine/threonine-protein kinase [EC:2.7.11.1]	ko04022	cGMP-PKG signaling pathway	http://www.kegg.jp/kegg-bin/show_pathway?ko04022+K04366
P04049	K04366	RAF1	RAF proto-oncogene serine/threonine-protein kinase [EC:2.7.11.1]	ko04024	cAMP signaling pathway	http://www.kegg.jp/kegg-bin/show_pathway?ko04024+K04366
P04049	K04366	RAF1	RAF proto-oncogene serine/threonine-protein kinase [EC:2.7.11.1]	ko04062	Chemokine signaling pathway	http://www.kegg.jp/kegg-bin/show_pathway?ko04062+K04366
P04049	K04366	RAF1	RAF proto-oncogene serine/threonine-protein kinase [EC:2.7.11.1]	ko04068	FoxO signaling pathway	http://www.kegg.jp/kegg-bin/show_pathway?ko04068+K04366
P04049	K04366	RAF1	RAF proto-oncogene serine/threonine-protein kinase [EC:2.7.11.1]	ko04071	Sphingolipid signaling pathway	http://www.kegg.jp/kegg-bin/show_pathway?ko04071+K04366
P04049	K04366	RAF1	RAF proto-oncogene serine/threonine-protein kinase [EC:2.7.11.1]	ko04072	Phospholipase D signaling pathway	http://www.kegg.jp/kegg-bin/show_pathway?ko04072+K04366
P04049	K04366	RAF1	RAF proto-oncogene serine/threonine-protein kinase [EC:2.7.11.1]	ko04140	Autophagy - animal	http://www.kegg.jp/kegg-bin/show_pathway?ko04140+K04366
P04049	K04366	RAF1	RAF proto-oncogene serine/threonine-protein kinase [EC:2.7.11.1]	ko04150	mTOR signaling pathway	http://www.kegg.jp/kegg-bin/show_pathway?ko04150+K04366
P04049	K04366	RAF1	RAF proto-oncogene serine/threonine-protein kinase [EC:2.7.11.1]	ko04151	PI3K-Akt signaling pathway	http://www.kegg.jp/kegg-bin/show_pathway?ko04151+K04366
P04049	K04366	RAF1	RAF proto-oncogene serine/threonine-protein kinase [EC:2.7.11.1]	ko04210	Apoptosis	http://www.kegg.jp/kegg-bin/show_pathway?ko04210+K04366
P04049	K04366	RAF1	RAF proto-oncogene serine/threonine-protein kinase [EC:2.7.11.1]	ko04218	Cellular senescence	http://www.kegg.jp/kegg-bin/show_pathway?ko04218+K04366
P04049	K04366	RAF1	RAF proto-oncogene serine/threonine-protein kinase [EC:2.7.11.1]	ko04270	Vascular smooth muscle contraction	http://www.kegg.jp/kegg-bin/show_pathway?ko04270+K04366
P04049	K04366	RAF1	RAF proto-oncogene serine/threonine-protein kinase [EC:2.7.11.1]	ko04360	Axon guidance	http://www.kegg.jp/kegg-bin/show_pathway?ko04360+K04366
P04049	K04366	RAF1	RAF proto-oncogene serine/threonine-protein kinase [EC:2.7.11.1]	ko04370	VEGF signaling pathway	http://www.kegg.jp/kegg-bin/show_pathway?ko04370+K04366
P04049	K04366	RAF1	RAF proto-oncogene serine/threonine-protein kinase [EC:2.7.11.1]	ko04371	Apelin signaling pathway	http://www.kegg.jp/kegg-bin/show_pathway?ko04371+K04366
P04049	K04366	RAF1	RAF proto-oncogene serine/threonine-protein kinase [EC:2.7.11.1]	ko04510	Focal adhesion	http://www.kegg.jp/kegg-bin/show_pathway?ko04510+K04366
P04049	K04366	RAF1	RAF proto-oncogene serine/threonine-protein kinase [EC:2.7.11.1]	ko04540	Gap junction	http://www.kegg.jp/kegg-bin/show_pathway?ko04540+K04366
P04049	K04366	RAF1	RAF proto-oncogene serine/threonine-protein kinase [EC:2.7.11.1]	ko04550	Signaling pathways regulating pluripotency of stem cells	http://www.kegg.jp/kegg-bin/show_pathway?ko04550+K04366
P04049	K04366	RAF1	RAF proto-oncogene serine/threonine-protein kinase [EC:2.7.11.1]	ko04625	C-type lectin receptor signaling pathway	http://www.kegg.jp/kegg-bin/show_pathway?ko04625+K04366
P04049	K04366	RAF1	RAF proto-oncogene serine/threonine-protein kinase [EC:2.7.11.1]	ko04630	JAK-STAT signaling pathway	http://www.kegg.jp/kegg-bin/show_pathway?ko04630+K04366
P04049	K04366	RAF1	RAF proto-oncogene serine/threonine-protein kinase [EC:2.7.11.1]	ko04650	Natural killer cell mediated cytotoxicity	http://www.kegg.jp/kegg-bin/show_pathway?ko04650+K04366
P04049	K04366	RAF1	RAF proto-oncogene serine/threonine-protein kinase [EC:2.7.11.1]	ko04660	T cell receptor signaling pathway	http://www.kegg.jp/kegg-bin/show_pathway?ko04660+K04366
P04049	K04366	RAF1	RAF proto-oncogene serine/threonine-protein kinase [EC:2.7.11.1]	ko04662	B cell receptor signaling pathway	http://www.kegg.jp/kegg-bin/show_pathway?ko04662+K04366
P04049	K04366	RAF1	RAF proto-oncogene serine/threonine-protein kinase [EC:2.7.11.1]	ko04664	Fc epsilon RI signaling pathway	http://www.kegg.jp/kegg-bin/show_pathway?ko04664+K04366
P04049	K04366	RAF1	RAF proto-oncogene serine/threonine-protein kinase [EC:2.7.11.1]	ko04666	Fc gamma R-mediated phagocytosis	http://www.kegg.jp/kegg-bin/show_pathway?ko04666+K04366
P04049	K04366	RAF1	RAF proto-oncogene serine/threonine-protein kinase [EC:2.7.11.1]	ko04720	Long-term potentiation	http://www.kegg.jp/kegg-bin/show_pathway?ko04720+K04366
P04049	K04366	RAF1	RAF proto-oncogene serine/threonine-protein kinase [EC:2.7.11.1]	ko04722	Neurotrophin signaling pathway	http://www.kegg.jp/kegg-bin/show_pathway?ko04722+K04366
P04049	K04366	RAF1	RAF proto-oncogene serine/threonine-protein kinase [EC:2.7.11.1]	ko04726	Serotonergic synapse	http://www.kegg.jp/kegg-bin/show_pathway?ko04726+K04366
P04049	K04366	RAF1	RAF proto-oncogene serine/threonine-protein kinase [EC:2.7.11.1]	ko04730	Long-term depression	http://www.kegg.jp/kegg-bin/show_pathway?ko04730+K04366
P04049	K04366	RAF1	RAF proto-oncogene serine/threonine-protein kinase [EC:2.7.11.1]	ko04810	Regulation of actin cytoskeleton	http://www.kegg.jp/kegg-bin/show_pathway?ko04810+K04366
P04049	K04366	RAF1	RAF proto-oncogene serine/threonine-protein kinase [EC:2.7.11.1]	ko04910	Insulin signaling pathway	http://www.kegg.jp/kegg-bin/show_pathway?ko04910+K04366
P04049	K04366	RAF1	RAF proto-oncogene serine/threonine-protein kinase [EC:2.7.11.1]	ko04912	GnRH signaling pathway	http://www.kegg.jp/kegg-bin/show_pathway?ko04912+K04366
P04049	K04366	RAF1	RAF proto-oncogene serine/threonine-protein kinase [EC:2.7.11.1]	ko04914	Progesterone-mediated oocyte maturation	http://www.kegg.jp/kegg-bin/show_pathway?ko04914+K04366
P04049	K04366	RAF1	RAF proto-oncogene serine/threonine-protein kinase [EC:2.7.11.1]	ko04915	Estrogen signaling pathway	http://www.kegg.jp/kegg-bin/show_pathway?ko04915+K04366
P04049	K04366	RAF1	RAF proto-oncogene serine/threonine-protein kinase [EC:2.7.11.1]	ko04916	Melanogenesis	http://www.kegg.jp/kegg-bin/show_pathway?ko04916+K04366
P04049	K04366	RAF1	RAF proto-oncogene serine/threonine-protein kinase [EC:2.7.11.1]	ko04917	Prolactin signaling pathway	http://www.kegg.jp/kegg-bin/show_pathway?ko04917+K04366
P04049	K04366	RAF1	RAF proto-oncogene serine/threonine-protein kinase [EC:2.7.11.1]	ko04919	Thyroid hormone signaling pathway	http://www.kegg.jp/kegg-bin/show_pathway?ko04919+K04366
P04049	K04366	RAF1	RAF proto-oncogene serine/threonine-protein kinase [EC:2.7.11.1]	ko04921	Oxytocin signaling pathway	http://www.kegg.jp/kegg-bin/show_pathway?ko04921+K04366
P04049	K04366	RAF1	RAF proto-oncogene serine/threonine-protein kinase [EC:2.7.11.1]	ko04926	Relaxin signaling pathway	http://www.kegg.jp/kegg-bin/show_pathway?ko04926+K04366
P04049	K04366	RAF1	RAF proto-oncogene serine/threonine-protein kinase [EC:2.7.11.1]	ko04928	Parathyroid hormone synthesis, secretion and action	http://www.kegg.jp/kegg-bin/show_pathway?ko04928+K04366
P04049	K04366	RAF1	RAF proto-oncogene serine/threonine-protein kinase [EC:2.7.11.1]	ko04929	GnRH secretion	http://www.kegg.jp/kegg-bin/show_pathway?ko04929+K04366
P04049	K04366	RAF1	RAF proto-oncogene serine/threonine-protein kinase [EC:2.7.11.1]	ko04935	Growth hormone synthesis, secretion and action	http://www.kegg.jp/kegg-bin/show_pathway?ko04935+K04366
P04049	K04366	RAF1	RAF proto-oncogene serine/threonine-protein kinase [EC:2.7.11.1]	ko05010	Alzheimer disease	http://www.kegg.jp/kegg-bin/show_pathway?ko05010+K04366
P04049	K04366	RAF1	RAF proto-oncogene serine/threonine-protein kinase [EC:2.7.11.1]	ko05034	Alcoholism	http://www.kegg.jp/kegg-bin/show_pathway?ko05034+K04366
P04049	K04366	RAF1	RAF proto-oncogene serine/threonine-protein kinase [EC:2.7.11.1]	ko05132	Salmonella infection	http://www.kegg.jp/kegg-bin/show_pathway?ko05132+K04366
P04049	K04366	RAF1	RAF proto-oncogene serine/threonine-protein kinase [EC:2.7.11.1]	ko05152	Tuberculosis	http://www.kegg.jp/kegg-bin/show_pathway?ko05152+K04366
P04049	K04366	RAF1	RAF proto-oncogene serine/threonine-protein kinase [EC:2.7.11.1]	ko05160	Hepatitis C	http://www.kegg.jp/kegg-bin/show_pathway?ko05160+K04366
P04049	K04366	RAF1	RAF proto-oncogene serine/threonine-protein kinase [EC:2.7.11.1]	ko05161	Hepatitis B	http://www.kegg.jp/kegg-bin/show_pathway?ko05161+K04366
P04049	K04366	RAF1	RAF proto-oncogene serine/threonine-protein kinase [EC:2.7.11.1]	ko05163	Human cytomegalovirus infection	http://www.kegg.jp/kegg-bin/show_pathway?ko05163+K04366
P04049	K04366	RAF1	RAF proto-oncogene serine/threonine-protein kinase [EC:2.7.11.1]	ko05164	Influenza A	http://www.kegg.jp/kegg-bin/show_pathway?ko05164+K04366
P04049	K04366	RAF1	RAF proto-oncogene serine/threonine-protein kinase [EC:2.7.11.1]	ko05165	Human papillomavirus infection	http://www.kegg.jp/kegg-bin/show_pathway?ko05165+K04366
P04049	K04366	RAF1	RAF proto-oncogene serine/threonine-protein kinase [EC:2.7.11.1]	ko05167	Kaposi sarcoma-associated herpesvirus infection	http://www.kegg.jp/kegg-bin/show_pathway?ko05167+K04366
P04049	K04366	RAF1	RAF proto-oncogene serine/threonine-protein kinase [EC:2.7.11.1]	ko05170	Human immunodeficiency virus 1 infection	http://www.kegg.jp/kegg-bin/show_pathway?ko05170+K04366
P04049	K04366	RAF1	RAF proto-oncogene serine/threonine-protein kinase [EC:2.7.11.1]	ko05200	Pathways in cancer	http://www.kegg.jp/kegg-bin/show_pathway?ko05200+K04366
P04049	K04366	RAF1	RAF proto-oncogene serine/threonine-protein kinase [EC:2.7.11.1]	ko05205	Proteoglycans in cancer	http://www.kegg.jp/kegg-bin/show_pathway?ko05205+K04366
P04049	K04366	RAF1	RAF proto-oncogene serine/threonine-protein kinase [EC:2.7.11.1]	ko05206	MicroRNAs in cancer	http://www.kegg.jp/kegg-bin/show_pathway?ko05206+K04366
P04049	K04366	RAF1	RAF proto-oncogene serine/threonine-protein kinase [EC:2.7.11.1]	ko05210	Colorectal cancer	http://www.kegg.jp/kegg-bin/show_pathway?ko05210+K04366
P04049	K04366	RAF1	RAF proto-oncogene serine/threonine-protein kinase [EC:2.7.11.1]	ko05211	Renal cell carcinoma	http://www.kegg.jp/kegg-bin/show_pathway?ko05211+K04366
P04049	K04366	RAF1	RAF proto-oncogene serine/threonine-protein kinase [EC:2.7.11.1]	ko05212	Pancreatic cancer	http://www.kegg.jp/kegg-bin/show_pathway?ko05212+K04366
P04049	K04366	RAF1	RAF proto-oncogene serine/threonine-protein kinase [EC:2.7.11.1]	ko05213	Endometrial cancer	http://www.kegg.jp/kegg-bin/show_pathway?ko05213+K04366
P04049	K04366	RAF1	RAF proto-oncogene serine/threonine-protein kinase [EC:2.7.11.1]	ko05214	Glioma	http://www.kegg.jp/kegg-bin/show_pathway?ko05214+K04366
P04049	K04366	RAF1	RAF proto-oncogene serine/threonine-protein kinase [EC:2.7.11.1]	ko05215	Prostate cancer	http://www.kegg.jp/kegg-bin/show_pathway?ko05215+K04366
P04049	K04366	RAF1	RAF proto-oncogene serine/threonine-protein kinase [EC:2.7.11.1]	ko05218	Melanoma	http://www.kegg.jp/kegg-bin/show_pathway?ko05218+K04366
P04049	K04366	RAF1	RAF proto-oncogene serine/threonine-protein kinase [EC:2.7.11.1]	ko05219	Bladder cancer	http://www.kegg.jp/kegg-bin/show_pathway?ko05219+K04366
P04049	K04366	RAF1	RAF proto-oncogene serine/threonine-protein kinase [EC:2.7.11.1]	ko05220	Chronic myeloid leukemia	http://www.kegg.jp/kegg-bin/show_pathway?ko05220+K04366
P04049	K04366	RAF1	RAF proto-oncogene serine/threonine-protein kinase [EC:2.7.11.1]	ko05221	Acute myeloid leukemia	http://www.kegg.jp/kegg-bin/show_pathway?ko05221+K04366
P04049	K04366	RAF1	RAF proto-oncogene serine/threonine-protein kinase [EC:2.7.11.1]	ko05223	Non-small cell lung cancer	http://www.kegg.jp/kegg-bin/show_pathway?ko05223+K04366
P04049	K04366	RAF1	RAF proto-oncogene serine/threonine-protein kinase [EC:2.7.11.1]	ko05224	Breast cancer	http://www.kegg.jp/kegg-bin/show_pathway?ko05224+K04366
P04049	K04366	RAF1	RAF proto-oncogene serine/threonine-protein kinase [EC:2.7.11.1]	ko05225	Hepatocellular carcinoma	http://www.kegg.jp/kegg-bin/show_pathway?ko05225+K04366
P04049	K04366	RAF1	RAF proto-oncogene serine/threonine-protein kinase [EC:2.7.11.1]	ko05226	Gastric cancer	http://www.kegg.jp/kegg-bin/show_pathway?ko05226+K04366
P04049	K04366	RAF1	RAF proto-oncogene serine/threonine-protein kinase [EC:2.7.11.1]	ko05230	Central carbon metabolism in cancer	http://www.kegg.jp/kegg-bin/show_pathway?ko05230+K04366
P04049	K04366	RAF1	RAF proto-oncogene serine/threonine-protein kinase [EC:2.7.11.1]	ko05231	Choline metabolism in cancer	http://www.kegg.jp/kegg-bin/show_pathway?ko05231+K04366
P04049	K04366	RAF1	RAF proto-oncogene serine/threonine-protein kinase [EC:2.7.11.1]	ko05235	PD-L1 expression and PD-1 checkpoint pathway in cancer	http://www.kegg.jp/kegg-bin/show_pathway?ko05235+K04366
Q9Y5K6	K13738	CD2AP	CD2-associated protein	ko05100	Bacterial invasion of epithelial cells	http://www.kegg.jp/kegg-bin/show_pathway?ko05100+K13738
P43246	K08735	MSH2	DNA mismatch repair protein MSH2	ko01524	Platinum drug resistance	http://www.kegg.jp/kegg-bin/show_pathway?ko01524+K08735
P43246	K08735	MSH2	DNA mismatch repair protein MSH2	ko03430	Mismatch repair	http://www.kegg.jp/kegg-bin/show_pathway?ko03430+K08735
P43246	K08735	MSH2	DNA mismatch repair protein MSH2	ko05200	Pathways in cancer	http://www.kegg.jp/kegg-bin/show_pathway?ko05200+K08735
P43246	K08735	MSH2	DNA mismatch repair protein MSH2	ko05210	Colorectal cancer	http://www.kegg.jp/kegg-bin/show_pathway?ko05210+K08735
Q7Z7A3	K14168	CTU1, NCS6	cytoplasmic tRNA 2-thiolation protein 1 [EC:2.7.7.-]	ko04122	Sulfur relay system	http://www.kegg.jp/kegg-bin/show_pathway?ko04122+K14168
Q8IYS1
P20248	K06627	CCNA	cyclin-A	ko04110	Cell cycle	http://www.kegg.jp/kegg-bin/show_pathway?ko04110+K06627
P20248	K06627	CCNA	cyclin-A	ko04152	AMPK signaling pathway	http://www.kegg.jp/kegg-bin/show_pathway?ko04152+K06627
P20248	K06627	CCNA	cyclin-A	ko04218	Cellular senescence	http://www.kegg.jp/kegg-bin/show_pathway?ko04218+K06627
P20248	K06627	CCNA	cyclin-A	ko04914	Progesterone-mediated oocyte maturation	http://www.kegg.jp/kegg-bin/show_pathway?ko04914+K06627
P20248	K06627	CCNA	cyclin-A	ko05161	Hepatitis B	http://www.kegg.jp/kegg-bin/show_pathway?ko05161+K06627
P20248	K06627	CCNA	cyclin-A	ko05165	Human papillomavirus infection	http://www.kegg.jp/kegg-bin/show_pathway?ko05165+K06627
P20248	K06627	CCNA	cyclin-A	ko05166	Human T-cell leukemia virus 1 infection	http://www.kegg.jp/kegg-bin/show_pathway?ko05166+K06627
P20248	K06627	CCNA	cyclin-A	ko05169	Epstein-Barr virus infection	http://www.kegg.jp/kegg-bin/show_pathway?ko05169+K06627
P20248	K06627	CCNA	cyclin-A	ko05200	Pathways in cancer	http://www.kegg.jp/kegg-bin/show_pathway?ko05200+K06627
P20248	K06627	CCNA	cyclin-A	ko05202	Transcriptional misregulation in cancer	http://www.kegg.jp/kegg-bin/show_pathway?ko05202+K06627
P20248	K06627	CCNA	cyclin-A	ko05203	Viral carcinogenesis	http://www.kegg.jp/kegg-bin/show_pathway?ko05203+K06627
P20248	K06627	CCNA	cyclin-A	ko05221	Acute myeloid leukemia	http://www.kegg.jp/kegg-bin/show_pathway?ko05221+K06627
Q96C36	K00286	proC	pyrroline-5-carboxylate reductase [EC:1.5.1.2]	ko00330	Arginine and proline metabolism	http://www.kegg.jp/kegg-bin/show_pathway?ko00330+K00286
Q96C36	K00286	proC	pyrroline-5-carboxylate reductase [EC:1.5.1.2]	ko01100	Metabolic pathways	http://www.kegg.jp/kegg-bin/show_pathway?ko01100+K00286
Q96C36	K00286	proC	pyrroline-5-carboxylate reductase [EC:1.5.1.2]	ko01110	Biosynthesis of secondary metabolites	http://www.kegg.jp/kegg-bin/show_pathway?ko01110+K00286
Q96C36	K00286	proC	pyrroline-5-carboxylate reductase [EC:1.5.1.2]	ko01230	Biosynthesis of amino acids	http://www.kegg.jp/kegg-bin/show_pathway?ko01230+K00286
P09601	K00510	HMOX1	heme oxygenase 1 [EC:1.14.14.18]	ko00860	Porphyrin and chlorophyll metabolism	http://www.kegg.jp/kegg-bin/show_pathway?ko00860+K00510
P09601	K00510	HMOX1	heme oxygenase 1 [EC:1.14.14.18]	ko01100	Metabolic pathways	http://www.kegg.jp/kegg-bin/show_pathway?ko01100+K00510
P09601	K00510	HMOX1	heme oxygenase 1 [EC:1.14.14.18]	ko01110	Biosynthesis of secondary metabolites	http://www.kegg.jp/kegg-bin/show_pathway?ko01110+K00510
P09601	K00510	HMOX1	heme oxygenase 1 [EC:1.14.14.18]	ko04066	HIF-1 signaling pathway	http://www.kegg.jp/kegg-bin/show_pathway?ko04066+K00510
P09601	K00510	HMOX1	heme oxygenase 1 [EC:1.14.14.18]	ko04216	Ferroptosis	http://www.kegg.jp/kegg-bin/show_pathway?ko04216+K00510
P09601	K00510	HMOX1	heme oxygenase 1 [EC:1.14.14.18]	ko04978	Mineral absorption	http://www.kegg.jp/kegg-bin/show_pathway?ko04978+K00510
P09601	K00510	HMOX1	heme oxygenase 1 [EC:1.14.14.18]	ko05200	Pathways in cancer	http://www.kegg.jp/kegg-bin/show_pathway?ko05200+K00510
P09601	K00510	HMOX1	heme oxygenase 1 [EC:1.14.14.18]	ko05206	MicroRNAs in cancer	http://www.kegg.jp/kegg-bin/show_pathway?ko05206+K00510
P09601	K00510	HMOX1	heme oxygenase 1 [EC:1.14.14.18]	ko05225	Hepatocellular carcinoma	http://www.kegg.jp/kegg-bin/show_pathway?ko05225+K00510
P09601	K00510	HMOX1	heme oxygenase 1 [EC:1.14.14.18]	ko05418	Fluid shear stress and atherosclerosis	http://www.kegg.jp/kegg-bin/show_pathway?ko05418+K00510
P49748	K09479	ACADVL	very long chain acyl-CoA dehydrogenase [EC:1.3.8.9]	ko00071	Fatty acid degradation	http://www.kegg.jp/kegg-bin/show_pathway?ko00071+K09479
P49748	K09479	ACADVL	very long chain acyl-CoA dehydrogenase [EC:1.3.8.9]	ko01100	Metabolic pathways	http://www.kegg.jp/kegg-bin/show_pathway?ko01100+K09479
P49748	K09479	ACADVL	very long chain acyl-CoA dehydrogenase [EC:1.3.8.9]	ko01212	Fatty acid metabolism	http://www.kegg.jp/kegg-bin/show_pathway?ko01212+K09479
P16219	K00248	ACADS, bcd	butyryl-CoA dehydrogenase [EC:1.3.8.1]	ko00071	Fatty acid degradation	http://www.kegg.jp/kegg-bin/show_pathway?ko00071+K00248
P16219	K00248	ACADS, bcd	butyryl-CoA dehydrogenase [EC:1.3.8.1]	ko00280	Valine, leucine and isoleucine degradation	http://www.kegg.jp/kegg-bin/show_pathway?ko00280+K00248
P16219	K00248	ACADS, bcd	butyryl-CoA dehydrogenase [EC:1.3.8.1]	ko00410	beta-Alanine metabolism	http://www.kegg.jp/kegg-bin/show_pathway?ko00410+K00248
P16219	K00248	ACADS, bcd	butyryl-CoA dehydrogenase [EC:1.3.8.1]	ko00640	Propanoate metabolism	http://www.kegg.jp/kegg-bin/show_pathway?ko00640+K00248
P16219	K00248	ACADS, bcd	butyryl-CoA dehydrogenase [EC:1.3.8.1]	ko00650	Butanoate metabolism	http://www.kegg.jp/kegg-bin/show_pathway?ko00650+K00248
P16219	K00248	ACADS, bcd	butyryl-CoA dehydrogenase [EC:1.3.8.1]	ko01100	Metabolic pathways	http://www.kegg.jp/kegg-bin/show_pathway?ko01100+K00248
P16219	K00248	ACADS, bcd	butyryl-CoA dehydrogenase [EC:1.3.8.1]	ko01110	Biosynthesis of secondary metabolites	http://www.kegg.jp/kegg-bin/show_pathway?ko01110+K00248
P16219	K00248	ACADS, bcd	butyryl-CoA dehydrogenase [EC:1.3.8.1]	ko01120	Microbial metabolism in diverse environments	http://www.kegg.jp/kegg-bin/show_pathway?ko01120+K00248
P16219	K00248	ACADS, bcd	butyryl-CoA dehydrogenase [EC:1.3.8.1]	ko01200	Carbon metabolism	http://www.kegg.jp/kegg-bin/show_pathway?ko01200+K00248
P16219	K00248	ACADS, bcd	butyryl-CoA dehydrogenase [EC:1.3.8.1]	ko01212	Fatty acid metabolism	http://www.kegg.jp/kegg-bin/show_pathway?ko01212+K00248
P20290	K01527	EGD1, BTF3	nascent polypeptide-associated complex subunit beta	ko04214	Apoptosis - fly	http://www.kegg.jp/kegg-bin/show_pathway?ko04214+K01527
Q8WY22
P49643	K02685	PRI2	DNA primase large subunit	ko03030	DNA replication	http://www.kegg.jp/kegg-bin/show_pathway?ko03030+K02685
P28562	K21278	DUSP1	dual specificity protein phosphatase 1 [EC:3.1.3.16 3.1.3.48]	ko04010	MAPK signaling pathway	http://www.kegg.jp/kegg-bin/show_pathway?ko04010+K21278
P28562	K21278	DUSP1	dual specificity protein phosphatase 1 [EC:3.1.3.16 3.1.3.48]	ko04726	Serotonergic synapse	http://www.kegg.jp/kegg-bin/show_pathway?ko04726+K21278
P28562	K21278	DUSP1	dual specificity protein phosphatase 1 [EC:3.1.3.16 3.1.3.48]	ko05418	Fluid shear stress and atherosclerosis	http://www.kegg.jp/kegg-bin/show_pathway?ko05418+K21278
Q14807	K10403	KIF22	kinesin family member 22	ko04914	Progesterone-mediated oocyte maturation	http://www.kegg.jp/kegg-bin/show_pathway?ko04914+K10403
Q9Y421	K13120	FAM32A	protein FAM32A
Q658P3	K10142	STEAP3, TSAP6	metalloreductase STEAP3 [EC:1.16.1.-]	ko04115	p53 signaling pathway	http://www.kegg.jp/kegg-bin/show_pathway?ko04115+K10142
Q658P3	K10142	STEAP3, TSAP6	metalloreductase STEAP3 [EC:1.16.1.-]	ko04216	Ferroptosis	http://www.kegg.jp/kegg-bin/show_pathway?ko04216+K10142
Q15334	K06094	LLGL	lethal(2) giant larvae protein	ko04390	Hippo signaling pathway	http://www.kegg.jp/kegg-bin/show_pathway?ko04390+K06094
Q15334	K06094	LLGL	lethal(2) giant larvae protein	ko04391	Hippo signaling pathway - fly	http://www.kegg.jp/kegg-bin/show_pathway?ko04391+K06094
Q15334	K06094	LLGL	lethal(2) giant larvae protein	ko04530	Tight junction	http://www.kegg.jp/kegg-bin/show_pathway?ko04530+K06094
Q15334	K06094	LLGL	lethal(2) giant larvae protein	ko05165	Human papillomavirus infection	http://www.kegg.jp/kegg-bin/show_pathway?ko05165+K06094
Q9H5V9
Q99986	K08816	VRK	vaccinia related kinase [EC:2.7.11.1]
Q9NVP1	K13179	DDX18, HAS1	ATP-dependent RNA helicase DDX18/HAS1 [EC:3.6.4.13]
Q15758	K05616	SLC1A5	solute carrier family 1 (neutral amino acid transporter), member 5	ko04974	Protein digestion and absorption	http://www.kegg.jp/kegg-bin/show_pathway?ko04974+K05616
Q15758	K05616	SLC1A5	solute carrier family 1 (neutral amino acid transporter), member 5	ko05230	Central carbon metabolism in cancer	http://www.kegg.jp/kegg-bin/show_pathway?ko05230+K05616
P46734	K04432	MAP2K3, MKK3	mitogen-activated protein kinase kinase 3 [EC:2.7.12.2]	ko04010	MAPK signaling pathway	http://www.kegg.jp/kegg-bin/show_pathway?ko04010+K04432
P46734	K04432	MAP2K3, MKK3	mitogen-activated protein kinase kinase 3 [EC:2.7.12.2]	ko04013	MAPK signaling pathway - fly	http://www.kegg.jp/kegg-bin/show_pathway?ko04013+K04432
P46734	K04432	MAP2K3, MKK3	mitogen-activated protein kinase kinase 3 [EC:2.7.12.2]	ko04015	Rap1 signaling pathway	http://www.kegg.jp/kegg-bin/show_pathway?ko04015+K04432
P46734	K04432	MAP2K3, MKK3	mitogen-activated protein kinase kinase 3 [EC:2.7.12.2]	ko04218	Cellular senescence	http://www.kegg.jp/kegg-bin/show_pathway?ko04218+K04432
P46734	K04432	MAP2K3, MKK3	mitogen-activated protein kinase kinase 3 [EC:2.7.12.2]	ko04620	Toll-like receptor signaling pathway	http://www.kegg.jp/kegg-bin/show_pathway?ko04620+K04432
P46734	K04432	MAP2K3, MKK3	mitogen-activated protein kinase kinase 3 [EC:2.7.12.2]	ko04624	Toll and Imd signaling pathway	http://www.kegg.jp/kegg-bin/show_pathway?ko04624+K04432
P46734	K04432	MAP2K3, MKK3	mitogen-activated protein kinase kinase 3 [EC:2.7.12.2]	ko04664	Fc epsilon RI signaling pathway	http://www.kegg.jp/kegg-bin/show_pathway?ko04664+K04432
P46734	K04432	MAP2K3, MKK3	mitogen-activated protein kinase kinase 3 [EC:2.7.12.2]	ko04668	TNF signaling pathway	http://www.kegg.jp/kegg-bin/show_pathway?ko04668+K04432
P46734	K04432	MAP2K3, MKK3	mitogen-activated protein kinase kinase 3 [EC:2.7.12.2]	ko04714	Thermogenesis	http://www.kegg.jp/kegg-bin/show_pathway?ko04714+K04432
P46734	K04432	MAP2K3, MKK3	mitogen-activated protein kinase kinase 3 [EC:2.7.12.2]	ko04750	Inflammatory mediator regulation of TRP channels	http://www.kegg.jp/kegg-bin/show_pathway?ko04750+K04432
P46734	K04432	MAP2K3, MKK3	mitogen-activated protein kinase kinase 3 [EC:2.7.12.2]	ko04912	GnRH signaling pathway	http://www.kegg.jp/kegg-bin/show_pathway?ko04912+K04432
P46734	K04432	MAP2K3, MKK3	mitogen-activated protein kinase kinase 3 [EC:2.7.12.2]	ko04935	Growth hormone synthesis, secretion and action	http://www.kegg.jp/kegg-bin/show_pathway?ko04935+K04432
P46734	K04432	MAP2K3, MKK3	mitogen-activated protein kinase kinase 3 [EC:2.7.12.2]	ko05014	Amyotrophic lateral sclerosis (ALS)	http://www.kegg.jp/kegg-bin/show_pathway?ko05014+K04432
P46734	K04432	MAP2K3, MKK3	mitogen-activated protein kinase kinase 3 [EC:2.7.12.2]	ko05132	Salmonella infection	http://www.kegg.jp/kegg-bin/show_pathway?ko05132+K04432
P46734	K04432	MAP2K3, MKK3	mitogen-activated protein kinase kinase 3 [EC:2.7.12.2]	ko05135	Yersinia infection	http://www.kegg.jp/kegg-bin/show_pathway?ko05135+K04432
P46734	K04432	MAP2K3, MKK3	mitogen-activated protein kinase kinase 3 [EC:2.7.12.2]	ko05145	Toxoplasmosis	http://www.kegg.jp/kegg-bin/show_pathway?ko05145+K04432
P46734	K04432	MAP2K3, MKK3	mitogen-activated protein kinase kinase 3 [EC:2.7.12.2]	ko05161	Hepatitis B	http://www.kegg.jp/kegg-bin/show_pathway?ko05161+K04432
P46734	K04432	MAP2K3, MKK3	mitogen-activated protein kinase kinase 3 [EC:2.7.12.2]	ko05169	Epstein-Barr virus infection	http://www.kegg.jp/kegg-bin/show_pathway?ko05169+K04432
P46734	K04432	MAP2K3, MKK3	mitogen-activated protein kinase kinase 3 [EC:2.7.12.2]	ko05170	Human immunodeficiency virus 1 infection	http://www.kegg.jp/kegg-bin/show_pathway?ko05170+K04432
P46734	K04432	MAP2K3, MKK3	mitogen-activated protein kinase kinase 3 [EC:2.7.12.2]	ko05235	PD-L1 expression and PD-1 checkpoint pathway in cancer	http://www.kegg.jp/kegg-bin/show_pathway?ko05235+K04432
P17026
P84022	K23605	SMAD3	mothers against decapentaplegic homolog 3	ko04068	FoxO signaling pathway	http://www.kegg.jp/kegg-bin/show_pathway?ko04068+K23605
P84022	K23605	SMAD3	mothers against decapentaplegic homolog 3	ko04110	Cell cycle	http://www.kegg.jp/kegg-bin/show_pathway?ko04110+K23605
P84022	K23605	SMAD3	mothers against decapentaplegic homolog 3	ko04144	Endocytosis	http://www.kegg.jp/kegg-bin/show_pathway?ko04144+K23605
P84022	K23605	SMAD3	mothers against decapentaplegic homolog 3	ko04218	Cellular senescence	http://www.kegg.jp/kegg-bin/show_pathway?ko04218+K23605
P84022	K23605	SMAD3	mothers against decapentaplegic homolog 3	ko04310	Wnt signaling pathway	http://www.kegg.jp/kegg-bin/show_pathway?ko04310+K23605
P84022	K23605	SMAD3	mothers against decapentaplegic homolog 3	ko04350	TGF-beta signaling pathway	http://www.kegg.jp/kegg-bin/show_pathway?ko04350+K23605
P84022	K23605	SMAD3	mothers against decapentaplegic homolog 3	ko04371	Apelin signaling pathway	http://www.kegg.jp/kegg-bin/show_pathway?ko04371+K23605
P84022	K23605	SMAD3	mothers against decapentaplegic homolog 3	ko04390	Hippo signaling pathway	http://www.kegg.jp/kegg-bin/show_pathway?ko04390+K23605
P84022	K23605	SMAD3	mothers against decapentaplegic homolog 3	ko04520	Adherens junction	http://www.kegg.jp/kegg-bin/show_pathway?ko04520+K23605
P84022	K23605	SMAD3	mothers against decapentaplegic homolog 3	ko04550	Signaling pathways regulating pluripotency of stem cells	http://www.kegg.jp/kegg-bin/show_pathway?ko04550+K23605
P84022	K23605	SMAD3	mothers against decapentaplegic homolog 3	ko04659	Th17 cell differentiation	http://www.kegg.jp/kegg-bin/show_pathway?ko04659+K23605
P84022	K23605	SMAD3	mothers against decapentaplegic homolog 3	ko04933	AGE-RAGE signaling pathway in diabetic complications	http://www.kegg.jp/kegg-bin/show_pathway?ko04933+K23605
P84022	K23605	SMAD3	mothers against decapentaplegic homolog 3	ko05161	Hepatitis B	http://www.kegg.jp/kegg-bin/show_pathway?ko05161+K23605
P84022	K23605	SMAD3	mothers against decapentaplegic homolog 3	ko05166	Human T-cell leukemia virus 1 infection	http://www.kegg.jp/kegg-bin/show_pathway?ko05166+K23605
P84022	K23605	SMAD3	mothers against decapentaplegic homolog 3	ko05200	Pathways in cancer	http://www.kegg.jp/kegg-bin/show_pathway?ko05200+K23605
P84022	K23605	SMAD3	mothers against decapentaplegic homolog 3	ko05210	Colorectal cancer	http://www.kegg.jp/kegg-bin/show_pathway?ko05210+K23605
P84022	K23605	SMAD3	mothers against decapentaplegic homolog 3	ko05212	Pancreatic cancer	http://www.kegg.jp/kegg-bin/show_pathway?ko05212+K23605
P84022	K23605	SMAD3	mothers against decapentaplegic homolog 3	ko05220	Chronic myeloid leukemia	http://www.kegg.jp/kegg-bin/show_pathway?ko05220+K23605
P84022	K23605	SMAD3	mothers against decapentaplegic homolog 3	ko05225	Hepatocellular carcinoma	http://www.kegg.jp/kegg-bin/show_pathway?ko05225+K23605
P84022	K23605	SMAD3	mothers against decapentaplegic homolog 3	ko05226	Gastric cancer	http://www.kegg.jp/kegg-bin/show_pathway?ko05226+K23605
P84022	K23605	SMAD3	mothers against decapentaplegic homolog 3	ko05321	Inflammatory bowel disease (IBD)	http://www.kegg.jp/kegg-bin/show_pathway?ko05321+K23605
P11908	K00948	PRPS, prsA	ribose-phosphate pyrophosphokinase [EC:2.7.6.1]	ko00030	Pentose phosphate pathway	http://www.kegg.jp/kegg-bin/show_pathway?ko00030+K00948
P11908	K00948	PRPS, prsA	ribose-phosphate pyrophosphokinase [EC:2.7.6.1]	ko00230	Purine metabolism	http://www.kegg.jp/kegg-bin/show_pathway?ko00230+K00948
P11908	K00948	PRPS, prsA	ribose-phosphate pyrophosphokinase [EC:2.7.6.1]	ko01100	Metabolic pathways	http://www.kegg.jp/kegg-bin/show_pathway?ko01100+K00948
P11908	K00948	PRPS, prsA	ribose-phosphate pyrophosphokinase [EC:2.7.6.1]	ko01110	Biosynthesis of secondary metabolites	http://www.kegg.jp/kegg-bin/show_pathway?ko01110+K00948
P11908	K00948	PRPS, prsA	ribose-phosphate pyrophosphokinase [EC:2.7.6.1]	ko01120	Microbial metabolism in diverse environments	http://www.kegg.jp/kegg-bin/show_pathway?ko01120+K00948
P11908	K00948	PRPS, prsA	ribose-phosphate pyrophosphokinase [EC:2.7.6.1]	ko01200	Carbon metabolism	http://www.kegg.jp/kegg-bin/show_pathway?ko01200+K00948
P11908	K00948	PRPS, prsA	ribose-phosphate pyrophosphokinase [EC:2.7.6.1]	ko01230	Biosynthesis of amino acids	http://www.kegg.jp/kegg-bin/show_pathway?ko01230+K00948
Q9BZM4	K07986	ULBP	UL16 binding protein	ko04650	Natural killer cell mediated cytotoxicity	http://www.kegg.jp/kegg-bin/show_pathway?ko04650+K07986
Q8WUQ7
Q9ULH1	K12488	ASAP	Arf-GAP with SH3 domain, ANK repeat and PH domain-containing protein	ko04144	Endocytosis	http://www.kegg.jp/kegg-bin/show_pathway?ko04144+K12488
Q9ULH1	K12488	ASAP	Arf-GAP with SH3 domain, ANK repeat and PH domain-containing protein	ko04666	Fc gamma R-mediated phagocytosis	http://www.kegg.jp/kegg-bin/show_pathway?ko04666+K12488
Q9H9Y2	K14846	RPF1	ribosome production factor 1
Q8NBI5	K08230	SLC43A3	MFS transporter, LAT3 family, solute carrier family 43, member 3
P55160	K05750	NCKAP1, NAP125	NCK-associated protein 1	ko04810	Regulation of actin cytoskeleton	http://www.kegg.jp/kegg-bin/show_pathway?ko04810+K05750
P55160	K05750	NCKAP1, NAP125	NCK-associated protein 1	ko05130	Pathogenic Escherichia coli infection	http://www.kegg.jp/kegg-bin/show_pathway?ko05130+K05750
P55160	K05750	NCKAP1, NAP125	NCK-associated protein 1	ko05132	Salmonella infection	http://www.kegg.jp/kegg-bin/show_pathway?ko05132+K05750
P26358	K00558	DNMT1, dcm	DNA (cytosine-5)-methyltransferase 1 [EC:2.1.1.37]	ko00270	Cysteine and methionine metabolism	http://www.kegg.jp/kegg-bin/show_pathway?ko00270+K00558
P26358	K00558	DNMT1, dcm	DNA (cytosine-5)-methyltransferase 1 [EC:2.1.1.37]	ko01100	Metabolic pathways	http://www.kegg.jp/kegg-bin/show_pathway?ko01100+K00558
P26358	K00558	DNMT1, dcm	DNA (cytosine-5)-methyltransferase 1 [EC:2.1.1.37]	ko05206	MicroRNAs in cancer	http://www.kegg.jp/kegg-bin/show_pathway?ko05206+K00558
Q13185	K11586	CBX3, HP1G	chromobox protein 3	ko05131	Shigellosis	http://www.kegg.jp/kegg-bin/show_pathway?ko05131+K11586
O94952	K10301	FBXO21	F-box protein 21
Q0VDF9
P49761	K08823	CLK2_3	dual specificity protein kinase CLK2/3 [EC:2.7.12.1]
Q8NBJ7
Q00059	K11830	TFAM, MTTFA	transcription factor A, mitochondrial	ko04371	Apelin signaling pathway	http://www.kegg.jp/kegg-bin/show_pathway?ko04371+K11830
Q00059	K11830	TFAM, MTTFA	transcription factor A, mitochondrial	ko05016	Huntington disease	http://www.kegg.jp/kegg-bin/show_pathway?ko05016+K11830
O43633	K12191	CHMP2A	charged multivesicular body protein 2A	ko04144	Endocytosis	http://www.kegg.jp/kegg-bin/show_pathway?ko04144+K12191
O43633	K12191	CHMP2A	charged multivesicular body protein 2A	ko04217	Necroptosis	http://www.kegg.jp/kegg-bin/show_pathway?ko04217+K12191
P37235	P37235
Q13472	K03165	TOP3	DNA topoisomerase III [EC:5.6.2.1]	ko03440	Homologous recombination	http://www.kegg.jp/kegg-bin/show_pathway?ko03440+K03165
Q13472	K03165	TOP3	DNA topoisomerase III [EC:5.6.2.1]	ko03460	Fanconi anemia pathway	http://www.kegg.jp/kegg-bin/show_pathway?ko03460+K03165
P24821	K06252	TN	tenascin	ko04151	PI3K-Akt signaling pathway	http://www.kegg.jp/kegg-bin/show_pathway?ko04151+K06252
P24821	K06252	TN	tenascin	ko04510	Focal adhesion	http://www.kegg.jp/kegg-bin/show_pathway?ko04510+K06252
P24821	K06252	TN	tenascin	ko04512	ECM-receptor interaction	http://www.kegg.jp/kegg-bin/show_pathway?ko04512+K06252
P24821	K06252	TN	tenascin	ko05165	Human papillomavirus infection	http://www.kegg.jp/kegg-bin/show_pathway?ko05165+K06252
P24821	K06252	TN	tenascin	ko05206	MicroRNAs in cancer	http://www.kegg.jp/kegg-bin/show_pathway?ko05206+K06252
Q9GZL7	K14863	WDR12, YTM1	ribosome biogenesis protein
Q96DG6	K01061	E3.1.1.45	carboxymethylenebutenolidase [EC:3.1.1.45]	ko00361	Chlorocyclohexane and chlorobenzene degradation	http://www.kegg.jp/kegg-bin/show_pathway?ko00361+K01061
Q96DG6	K01061	E3.1.1.45	carboxymethylenebutenolidase [EC:3.1.1.45]	ko00364	Fluorobenzoate degradation	http://www.kegg.jp/kegg-bin/show_pathway?ko00364+K01061
Q96DG6	K01061	E3.1.1.45	carboxymethylenebutenolidase [EC:3.1.1.45]	ko00623	Toluene degradation	http://www.kegg.jp/kegg-bin/show_pathway?ko00623+K01061
Q96DG6	K01061	E3.1.1.45	carboxymethylenebutenolidase [EC:3.1.1.45]	ko01100	Metabolic pathways	http://www.kegg.jp/kegg-bin/show_pathway?ko01100+K01061
Q96DG6	K01061	E3.1.1.45	carboxymethylenebutenolidase [EC:3.1.1.45]	ko01120	Microbial metabolism in diverse environments	http://www.kegg.jp/kegg-bin/show_pathway?ko01120+K01061
Q13526	K09578	PIN1	peptidyl-prolyl cis-trans isomerase NIMA-interacting 1 [EC:5.2.1.8]	ko04622	RIG-I-like receptor signaling pathway	http://www.kegg.jp/kegg-bin/show_pathway?ko04622+K09578
P78540	K01476	E3.5.3.1, rocF, arg	arginase [EC:3.5.3.1]	ko00220	Arginine biosynthesis	http://www.kegg.jp/kegg-bin/show_pathway?ko00220+K01476
P78540	K01476	E3.5.3.1, rocF, arg	arginase [EC:3.5.3.1]	ko00330	Arginine and proline metabolism	http://www.kegg.jp/kegg-bin/show_pathway?ko00330+K01476
P78540	K01476	E3.5.3.1, rocF, arg	arginase [EC:3.5.3.1]	ko01100	Metabolic pathways	http://www.kegg.jp/kegg-bin/show_pathway?ko01100+K01476
P78540	K01476	E3.5.3.1, rocF, arg	arginase [EC:3.5.3.1]	ko01110	Biosynthesis of secondary metabolites	http://www.kegg.jp/kegg-bin/show_pathway?ko01110+K01476
P78540	K01476	E3.5.3.1, rocF, arg	arginase [EC:3.5.3.1]	ko01230	Biosynthesis of amino acids	http://www.kegg.jp/kegg-bin/show_pathway?ko01230+K01476
P78540	K01476	E3.5.3.1, rocF, arg	arginase [EC:3.5.3.1]	ko05146	Amoebiasis	http://www.kegg.jp/kegg-bin/show_pathway?ko05146+K01476
P63146	K10574	UBE2B, RAD6B	ubiquitin-conjugating enzyme E2 B [EC:2.3.2.23]	ko04120	Ubiquitin mediated proteolysis	http://www.kegg.jp/kegg-bin/show_pathway?ko04120+K10574
Q8NAB2	K10471	KBTBD3	kelch repeat and BTB domain-containing protein 3
Q9UIV1	K12581	CNOT7_8, CAF1, POP2	CCR4-NOT transcription complex subunit 7/8	ko03018	RNA degradation	http://www.kegg.jp/kegg-bin/show_pathway?ko03018+K12581
Q01973	K05122	ROR1, NTRKR1	receptor tyrosine kinase-like orphan receptor 1 [EC:2.7.10.1]	ko04310	Wnt signaling pathway	http://www.kegg.jp/kegg-bin/show_pathway?ko04310+K05122
O14678	K05678	ABCD4, PXMP1L	ATP-binding cassette, subfamily D (ALD), member 4	ko02010	ABC transporters	http://www.kegg.jp/kegg-bin/show_pathway?ko02010+K05678
O14678	K05678	ABCD4, PXMP1L	ATP-binding cassette, subfamily D (ALD), member 4	ko04146	Peroxisome	http://www.kegg.jp/kegg-bin/show_pathway?ko04146+K05678
Q9Y3B9
O15347	K11296	HMGB3	high mobility group protein B3
Q9UN76	K05047	SLC6A14	solute carrier family 6 (neurotransmitter transporter) member 14
Q9Y244	K11599	POMP, UMP1	proteasome maturation protein	ko03050	Proteasome	http://www.kegg.jp/kegg-bin/show_pathway?ko03050+K11599
P12235	K05863	SLC25A4S, ANT	solute carrier family 25 (mitochondrial adenine nucleotide translocator), member 4/5/6/31	ko04020	Calcium signaling pathway	http://www.kegg.jp/kegg-bin/show_pathway?ko04020+K05863
P12235	K05863	SLC25A4S, ANT	solute carrier family 25 (mitochondrial adenine nucleotide translocator), member 4/5/6/31	ko04022	cGMP-PKG signaling pathway	http://www.kegg.jp/kegg-bin/show_pathway?ko04022+K05863
P12235	K05863	SLC25A4S, ANT	solute carrier family 25 (mitochondrial adenine nucleotide translocator), member 4/5/6/31	ko04217	Necroptosis	http://www.kegg.jp/kegg-bin/show_pathway?ko04217+K05863
P12235	K05863	SLC25A4S, ANT	solute carrier family 25 (mitochondrial adenine nucleotide translocator), member 4/5/6/31	ko04218	Cellular senescence	http://www.kegg.jp/kegg-bin/show_pathway?ko04218+K05863
P12235	K05863	SLC25A4S, ANT	solute carrier family 25 (mitochondrial adenine nucleotide translocator), member 4/5/6/31	ko05010	Alzheimer disease	http://www.kegg.jp/kegg-bin/show_pathway?ko05010+K05863
P12235	K05863	SLC25A4S, ANT	solute carrier family 25 (mitochondrial adenine nucleotide translocator), member 4/5/6/31	ko05012	Parkinson disease	http://www.kegg.jp/kegg-bin/show_pathway?ko05012+K05863
P12235	K05863	SLC25A4S, ANT	solute carrier family 25 (mitochondrial adenine nucleotide translocator), member 4/5/6/31	ko05016	Huntington disease	http://www.kegg.jp/kegg-bin/show_pathway?ko05016+K05863
P12235	K05863	SLC25A4S, ANT	solute carrier family 25 (mitochondrial adenine nucleotide translocator), member 4/5/6/31	ko05164	Influenza A	http://www.kegg.jp/kegg-bin/show_pathway?ko05164+K05863
P12235	K05863	SLC25A4S, ANT	solute carrier family 25 (mitochondrial adenine nucleotide translocator), member 4/5/6/31	ko05166	Human T-cell leukemia virus 1 infection	http://www.kegg.jp/kegg-bin/show_pathway?ko05166+K05863
Q99880	K11252	H2B	histone H2B	ko05034	Alcoholism	http://www.kegg.jp/kegg-bin/show_pathway?ko05034+K11252
Q99880	K11252	H2B	histone H2B	ko05203	Viral carcinogenesis	http://www.kegg.jp/kegg-bin/show_pathway?ko05203+K11252
Q99880	K11252	H2B	histone H2B	ko05322	Systemic lupus erythematosus	http://www.kegg.jp/kegg-bin/show_pathway?ko05322+K11252
O75691	K14772	UTP20	U3 small nucleolar RNA-associated protein 20
Q9NQZ2	K14767	UTP3, SAS10	U3 small nucleolar RNA-associated protein 3
Q99717	K16790	SMAD5	mothers against decapentaplegic homolog 5	ko04350	TGF-beta signaling pathway	http://www.kegg.jp/kegg-bin/show_pathway?ko04350+K16790
Q99717	K16790	SMAD5	mothers against decapentaplegic homolog 5	ko04550	Signaling pathways regulating pluripotency of stem cells	http://www.kegg.jp/kegg-bin/show_pathway?ko04550+K16790
Q96ST2	K17498	SPN1, IWS1	transcription factor SPN1
O00483	K03948	NDUFA4	NADH dehydrogenase (ubiquinone) 1 alpha subcomplex subunit 4	ko00190	Oxidative phosphorylation	http://www.kegg.jp/kegg-bin/show_pathway?ko00190+K03948
O00483	K03948	NDUFA4	NADH dehydrogenase (ubiquinone) 1 alpha subcomplex subunit 4	ko01100	Metabolic pathways	http://www.kegg.jp/kegg-bin/show_pathway?ko01100+K03948
O00483	K03948	NDUFA4	NADH dehydrogenase (ubiquinone) 1 alpha subcomplex subunit 4	ko04714	Thermogenesis	http://www.kegg.jp/kegg-bin/show_pathway?ko04714+K03948
O00483	K03948	NDUFA4	NADH dehydrogenase (ubiquinone) 1 alpha subcomplex subunit 4	ko04723	Retrograde endocannabinoid signaling	http://www.kegg.jp/kegg-bin/show_pathway?ko04723+K03948
O00483	K03948	NDUFA4	NADH dehydrogenase (ubiquinone) 1 alpha subcomplex subunit 4	ko04932	Non-alcoholic fatty liver disease (NAFLD)	http://www.kegg.jp/kegg-bin/show_pathway?ko04932+K03948
O00483	K03948	NDUFA4	NADH dehydrogenase (ubiquinone) 1 alpha subcomplex subunit 4	ko05010	Alzheimer disease	http://www.kegg.jp/kegg-bin/show_pathway?ko05010+K03948
O00483	K03948	NDUFA4	NADH dehydrogenase (ubiquinone) 1 alpha subcomplex subunit 4	ko05012	Parkinson disease	http://www.kegg.jp/kegg-bin/show_pathway?ko05012+K03948
O00483	K03948	NDUFA4	NADH dehydrogenase (ubiquinone) 1 alpha subcomplex subunit 4	ko05016	Huntington disease	http://www.kegg.jp/kegg-bin/show_pathway?ko05016+K03948
Q15397	K14844	PUF6	pumilio homology domain family member 6
Q9H3G5	K09645	CPVL	vitellogenic carboxypeptidase-like protein [EC:3.4.16.-]
Q9UBT7
Q13057	K02318	COASY	phosphopantetheine adenylyltransferase / dephospho-CoA kinase [EC:2.7.7.3 2.7.1.24]	ko00770	Pantothenate and CoA biosynthesis	http://www.kegg.jp/kegg-bin/show_pathway?ko00770+K02318
Q13057	K02318	COASY	phosphopantetheine adenylyltransferase / dephospho-CoA kinase [EC:2.7.7.3 2.7.1.24]	ko01100	Metabolic pathways	http://www.kegg.jp/kegg-bin/show_pathway?ko01100+K02318
Q9BVP2	K14538	NUG1, GNL3	nuclear GTP-binding protein	ko03008	Ribosome biogenesis in eukaryotes	http://www.kegg.jp/kegg-bin/show_pathway?ko03008+K14538
P05386	K02942	RP-LP1, RPLP1	large subunit ribosomal protein LP1	ko03010	Ribosome	http://www.kegg.jp/kegg-bin/show_pathway?ko03010+K02942
P35625	K16866	TIMP3	metalloproteinase inhibitor 3	ko05205	Proteoglycans in cancer	http://www.kegg.jp/kegg-bin/show_pathway?ko05205+K16866
P35625	K16866	TIMP3	metalloproteinase inhibitor 3	ko05206	MicroRNAs in cancer	http://www.kegg.jp/kegg-bin/show_pathway?ko05206+K16866
P14635	K05868	CCNB1	G2/mitotic-specific cyclin-B1	ko04068	FoxO signaling pathway	http://www.kegg.jp/kegg-bin/show_pathway?ko04068+K05868
P14635	K05868	CCNB1	G2/mitotic-specific cyclin-B1	ko04110	Cell cycle	http://www.kegg.jp/kegg-bin/show_pathway?ko04110+K05868
P14635	K05868	CCNB1	G2/mitotic-specific cyclin-B1	ko04114	Oocyte meiosis	http://www.kegg.jp/kegg-bin/show_pathway?ko04114+K05868
P14635	K05868	CCNB1	G2/mitotic-specific cyclin-B1	ko04115	p53 signaling pathway	http://www.kegg.jp/kegg-bin/show_pathway?ko04115+K05868
P14635	K05868	CCNB1	G2/mitotic-specific cyclin-B1	ko04218	Cellular senescence	http://www.kegg.jp/kegg-bin/show_pathway?ko04218+K05868
P14635	K05868	CCNB1	G2/mitotic-specific cyclin-B1	ko04914	Progesterone-mediated oocyte maturation	http://www.kegg.jp/kegg-bin/show_pathway?ko04914+K05868
P14635	K05868	CCNB1	G2/mitotic-specific cyclin-B1	ko05170	Human immunodeficiency virus 1 infection	http://www.kegg.jp/kegg-bin/show_pathway?ko05170+K05868
P29317	K05103	EPHA2, ECK	Eph receptor A2 [EC:2.7.10.1]	ko04010	MAPK signaling pathway	http://www.kegg.jp/kegg-bin/show_pathway?ko04010+K05103
P29317	K05103	EPHA2, ECK	Eph receptor A2 [EC:2.7.10.1]	ko04014	Ras signaling pathway	http://www.kegg.jp/kegg-bin/show_pathway?ko04014+K05103
P29317	K05103	EPHA2, ECK	Eph receptor A2 [EC:2.7.10.1]	ko04015	Rap1 signaling pathway	http://www.kegg.jp/kegg-bin/show_pathway?ko04015+K05103
P29317	K05103	EPHA2, ECK	Eph receptor A2 [EC:2.7.10.1]	ko04151	PI3K-Akt signaling pathway	http://www.kegg.jp/kegg-bin/show_pathway?ko04151+K05103
P29317	K05103	EPHA2, ECK	Eph receptor A2 [EC:2.7.10.1]	ko04360	Axon guidance	http://www.kegg.jp/kegg-bin/show_pathway?ko04360+K05103
Q96CX2	K21918	KCTD8_12_16	BTB/POZ domain-containing protein KCTD8/12/16
Q86YN1	K07252	DOLPP1	dolichyldiphosphatase [EC:3.6.1.43]	ko00510	N-Glycan biosynthesis	http://www.kegg.jp/kegg-bin/show_pathway?ko00510+K07252
Q11128
Q99543	K09522	DNAJC2	DnaJ homolog subfamily C member 2
Q8N488	K11469	RYBP	RING1 and YY1-binding protein
Q330K2	K18163	NDUFAF6	NADH dehydrogenase [ubiquinone] 1 alpha subcomplex assembly factor 6	ko04714	Thermogenesis	http://www.kegg.jp/kegg-bin/show_pathway?ko04714+K18163
Q9NRZ9	K19001	HELLS, DDM1	ATP-dependent DNA helicase
P33316	K01520	dut, DUT	dUTP pyrophosphatase [EC:3.6.1.23]	ko00240	Pyrimidine metabolism	http://www.kegg.jp/kegg-bin/show_pathway?ko00240+K01520
P33316	K01520	dut, DUT	dUTP pyrophosphatase [EC:3.6.1.23]	ko00983	Drug metabolism - other enzymes	http://www.kegg.jp/kegg-bin/show_pathway?ko00983+K01520
P33316	K01520	dut, DUT	dUTP pyrophosphatase [EC:3.6.1.23]	ko01100	Metabolic pathways	http://www.kegg.jp/kegg-bin/show_pathway?ko01100+K01520
P61218	K03014	RPB6, POLR2F	DNA-directed RNA polymerases I, II, and III subunit RPABC2	ko03020	RNA polymerase	http://www.kegg.jp/kegg-bin/show_pathway?ko03020+K03014
P61218	K03014	RPB6, POLR2F	DNA-directed RNA polymerases I, II, and III subunit RPABC2	ko04623	Cytosolic DNA-sensing pathway	http://www.kegg.jp/kegg-bin/show_pathway?ko04623+K03014
P61218	K03014	RPB6, POLR2F	DNA-directed RNA polymerases I, II, and III subunit RPABC2	ko05016	Huntington disease	http://www.kegg.jp/kegg-bin/show_pathway?ko05016+K03014
Q9BRS2	K07178	RIOK1	RIO kinase 1 [EC:2.7.11.1]	ko03008	Ribosome biogenesis in eukaryotes	http://www.kegg.jp/kegg-bin/show_pathway?ko03008+K07178
P18085	K07939	ARF4	ADP-ribosylation factor 4
Q9NV31	K14560	IMP3	U3 small nucleolar ribonucleoprotein protein IMP3	ko03008	Ribosome biogenesis in eukaryotes	http://www.kegg.jp/kegg-bin/show_pathway?ko03008+K14560
Q9NZJ9	K07766	E3.6.1.52	diphosphoinositol-polyphosphate diphosphatase [EC:3.6.1.52]
P57764	K20917	GSDMD	gasdermin-D	ko04621	NOD-like receptor signaling pathway	http://www.kegg.jp/kegg-bin/show_pathway?ko04621+K20917
P57764	K20917	GSDMD	gasdermin-D	ko05132	Salmonella infection	http://www.kegg.jp/kegg-bin/show_pathway?ko05132+K20917
Q8IVL1	K19483	NAV2	neuron navigator 2 [EC:3.6.4.12]
O15116	K12620	LSM1	U6 snRNA-associated Sm-like protein LSm1	ko03018	RNA degradation	http://www.kegg.jp/kegg-bin/show_pathway?ko03018+K12620
Q6P9A2	K00710	GALNT	polypeptide N-acetylgalactosaminyltransferase [EC:2.4.1.41]	ko00512	Mucin type O-glycan biosynthesis	http://www.kegg.jp/kegg-bin/show_pathway?ko00512+K00710
Q6P9A2	K00710	GALNT	polypeptide N-acetylgalactosaminyltransferase [EC:2.4.1.41]	ko00514	Other types of O-glycan biosynthesis	http://www.kegg.jp/kegg-bin/show_pathway?ko00514+K00710
Q6P9A2	K00710	GALNT	polypeptide N-acetylgalactosaminyltransferase [EC:2.4.1.41]	ko01100	Metabolic pathways	http://www.kegg.jp/kegg-bin/show_pathway?ko01100+K00710
Q8NFP9
O60675	K09037	MAFF_G_K	transcription factor MAFF/G/K
P53350	K06631	PLK1	polo-like kinase 1 [EC:2.7.11.21]	ko04068	FoxO signaling pathway	http://www.kegg.jp/kegg-bin/show_pathway?ko04068+K06631
P53350	K06631	PLK1	polo-like kinase 1 [EC:2.7.11.21]	ko04110	Cell cycle	http://www.kegg.jp/kegg-bin/show_pathway?ko04110+K06631
P53350	K06631	PLK1	polo-like kinase 1 [EC:2.7.11.21]	ko04114	Oocyte meiosis	http://www.kegg.jp/kegg-bin/show_pathway?ko04114+K06631
P53350	K06631	PLK1	polo-like kinase 1 [EC:2.7.11.21]	ko04914	Progesterone-mediated oocyte maturation	http://www.kegg.jp/kegg-bin/show_pathway?ko04914+K06631
Q9Y5V0
P62805	K11254	H4	histone H4	ko05034	Alcoholism	http://www.kegg.jp/kegg-bin/show_pathway?ko05034+K11254
P62805	K11254	H4	histone H4	ko05203	Viral carcinogenesis	http://www.kegg.jp/kegg-bin/show_pathway?ko05203+K11254
P62805	K11254	H4	histone H4	ko05322	Systemic lupus erythematosus	http://www.kegg.jp/kegg-bin/show_pathway?ko05322+K11254
Q71DI3	K11253	H3	histone H3	ko05034	Alcoholism	http://www.kegg.jp/kegg-bin/show_pathway?ko05034+K11253
Q71DI3	K11253	H3	histone H3	ko05131	Shigellosis	http://www.kegg.jp/kegg-bin/show_pathway?ko05131+K11253
Q71DI3	K11253	H3	histone H3	ko05202	Transcriptional misregulation in cancer	http://www.kegg.jp/kegg-bin/show_pathway?ko05202+K11253
Q71DI3	K11253	H3	histone H3	ko05322	Systemic lupus erythematosus	http://www.kegg.jp/kegg-bin/show_pathway?ko05322+K11253
O60870	K13102	KIN	DNA/RNA-binding protein KIN17
P07305	K11275	H1_5	histone H1/5
Q99848	K14823	EBP2, EBNA1BP2	rRNA-processing protein EBP2
Q8IYL3
Q9BX40	K18749	LSM14, RAP55, SCD6	protein LSM14
Q9BV57	K08967	mtnD, mtnZ, ADI1	1,2-dihydroxy-3-keto-5-methylthiopentene dioxygenase [EC:1.13.11.53 1.13.11.54]	ko00270	Cysteine and methionine metabolism	http://www.kegg.jp/kegg-bin/show_pathway?ko00270+K08967
Q9BV57	K08967	mtnD, mtnZ, ADI1	1,2-dihydroxy-3-keto-5-methylthiopentene dioxygenase [EC:1.13.11.53 1.13.11.54]	ko01100	Metabolic pathways	http://www.kegg.jp/kegg-bin/show_pathway?ko01100+K08967
A6NHL2	K07374	TUBA	tubulin alpha	ko04145	Phagosome	http://www.kegg.jp/kegg-bin/show_pathway?ko04145+K07374
A6NHL2	K07374	TUBA	tubulin alpha	ko04210	Apoptosis	http://www.kegg.jp/kegg-bin/show_pathway?ko04210+K07374
A6NHL2	K07374	TUBA	tubulin alpha	ko04530	Tight junction	http://www.kegg.jp/kegg-bin/show_pathway?ko04530+K07374
A6NHL2	K07374	TUBA	tubulin alpha	ko04540	Gap junction	http://www.kegg.jp/kegg-bin/show_pathway?ko04540+K07374
A6NHL2	K07374	TUBA	tubulin alpha	ko05010	Alzheimer disease	http://www.kegg.jp/kegg-bin/show_pathway?ko05010+K07374
A6NHL2	K07374	TUBA	tubulin alpha	ko05016	Huntington disease	http://www.kegg.jp/kegg-bin/show_pathway?ko05016+K07374
A6NHL2	K07374	TUBA	tubulin alpha	ko05130	Pathogenic Escherichia coli infection	http://www.kegg.jp/kegg-bin/show_pathway?ko05130+K07374
Q99933	K09555	BAG1	BCL2-associated athanogene 1	ko04141	Protein processing in endoplasmic reticulum	http://www.kegg.jp/kegg-bin/show_pathway?ko04141+K09555
Q8WUW1	K05752	C3ORF10, HSPC300	chromosome 3 open reading frame 10	ko04810	Regulation of actin cytoskeleton	http://www.kegg.jp/kegg-bin/show_pathway?ko04810+K05752
Q8WUW1	K05752	C3ORF10, HSPC300	chromosome 3 open reading frame 10	ko05130	Pathogenic Escherichia coli infection	http://www.kegg.jp/kegg-bin/show_pathway?ko05130+K05752
Q8WUW1	K05752	C3ORF10, HSPC300	chromosome 3 open reading frame 10	ko05132	Salmonella infection	http://www.kegg.jp/kegg-bin/show_pathway?ko05132+K05752
Q9Y3E7	K12193	VPS24, CHMP3	charged multivesicular body protein 3	ko04144	Endocytosis	http://www.kegg.jp/kegg-bin/show_pathway?ko04144+K12193
Q9Y3E7	K12193	VPS24, CHMP3	charged multivesicular body protein 3	ko04217	Necroptosis	http://www.kegg.jp/kegg-bin/show_pathway?ko04217+K12193
Q9NR30	K16911	DDX21	ATP-dependent RNA helicase DDX21 [EC:3.6.4.13]
Q6UWP2	K22970	DHRS11	17beta-estradiol 17-dehydrogenase / 3beta-hydroxysteroid 3-dehydrogenase [EC:1.1.1.62 1.1.1.270]	ko00140	Steroid hormone biosynthesis	http://www.kegg.jp/kegg-bin/show_pathway?ko00140+K22970
Q9Y6E2
Q6DN03	K11252	H2B	histone H2B	ko05034	Alcoholism	http://www.kegg.jp/kegg-bin/show_pathway?ko05034+K11252
Q6DN03	K11252	H2B	histone H2B	ko05203	Viral carcinogenesis	http://www.kegg.jp/kegg-bin/show_pathway?ko05203+K11252
Q6DN03	K11252	H2B	histone H2B	ko05322	Systemic lupus erythematosus	http://www.kegg.jp/kegg-bin/show_pathway?ko05322+K11252
Q9BWE0
P49759	K23561	CLK1_4	dual specificity protein kinase CLK1/4 [EC:2.7.12.1]	ko05134	Legionellosis	http://www.kegg.jp/kegg-bin/show_pathway?ko05134+K23561
Q9UNQ2	K14191	DIM1	18S rRNA (adenine1779-N6/adenine1780-N6)-dimethyltransferase [EC:2.1.1.183]
Q92766	K20210	RREB1	ras-responsive element-binding protein 1	ko04013	MAPK signaling pathway - fly	http://www.kegg.jp/kegg-bin/show_pathway?ko04013+K20210
Q9Y2Z9	K06126	COQ6	ubiquinone biosynthesis monooxygenase Coq6 [EC:1.14.13.-]	ko00130	Ubiquinone and other terpenoid-quinone biosynthesis	http://www.kegg.jp/kegg-bin/show_pathway?ko00130+K06126
Q9Y2Z9	K06126	COQ6	ubiquinone biosynthesis monooxygenase Coq6 [EC:1.14.13.-]	ko01100	Metabolic pathways	http://www.kegg.jp/kegg-bin/show_pathway?ko01100+K06126
Q9Y2Z9	K06126	COQ6	ubiquinone biosynthesis monooxygenase Coq6 [EC:1.14.13.-]	ko01110	Biosynthesis of secondary metabolites	http://www.kegg.jp/kegg-bin/show_pathway?ko01110+K06126
Q9BQG0	K02331	POL5, MYBBP1A	DNA polymerase phi [EC:2.7.7.7]
Q92688	K18647	ANP32B	acidic leucine-rich nuclear phosphoprotein 32 family member B
P15407	K04502	FOSL1	fos-like antigen 1	ko04310	Wnt signaling pathway	http://www.kegg.jp/kegg-bin/show_pathway?ko04310+K04502
P15407	K04502	FOSL1	fos-like antigen 1	ko04380	Osteoclast differentiation	http://www.kegg.jp/kegg-bin/show_pathway?ko04380+K04502
P15407	K04502	FOSL1	fos-like antigen 1	ko04657	IL-17 signaling pathway	http://www.kegg.jp/kegg-bin/show_pathway?ko04657+K04502
P15407	K04502	FOSL1	fos-like antigen 1	ko05166	Human T-cell leukemia virus 1 infection	http://www.kegg.jp/kegg-bin/show_pathway?ko05166+K04502
Q8IUF8	K21760	RIOX2, MINA	bifunctional lysine-specific demethylase and histidyl-hydroxylase MINA [EC:1.14.11.-]
Q6PL18	K22531	ATAD2	ATPase family AAA domain-containing protein 2 [EC:3.6.1.-]
P07477	K01312	PRSS1_2_3	trypsin [EC:3.4.21.4]	ko04080	Neuroactive ligand-receptor interaction	http://www.kegg.jp/kegg-bin/show_pathway?ko04080+K01312
P07477	K01312	PRSS1_2_3	trypsin [EC:3.4.21.4]	ko04972	Pancreatic secretion	http://www.kegg.jp/kegg-bin/show_pathway?ko04972+K01312
P07477	K01312	PRSS1_2_3	trypsin [EC:3.4.21.4]	ko04974	Protein digestion and absorption	http://www.kegg.jp/kegg-bin/show_pathway?ko04974+K01312
P07477	K01312	PRSS1_2_3	trypsin [EC:3.4.21.4]	ko05164	Influenza A	http://www.kegg.jp/kegg-bin/show_pathway?ko05164+K01312
P28347	K09448	TEAD	transcriptional enhancer factor	ko04011	MAPK signaling pathway - yeast	http://www.kegg.jp/kegg-bin/show_pathway?ko04011+K09448
P28347	K09448	TEAD	transcriptional enhancer factor	ko04390	Hippo signaling pathway	http://www.kegg.jp/kegg-bin/show_pathway?ko04390+K09448
P28347	K09448	TEAD	transcriptional enhancer factor	ko04391	Hippo signaling pathway - fly	http://www.kegg.jp/kegg-bin/show_pathway?ko04391+K09448
P28347	K09448	TEAD	transcriptional enhancer factor	ko04392	Hippo signaling pathway - multiple species	http://www.kegg.jp/kegg-bin/show_pathway?ko04392+K09448
Q9ULW0	K16812	TPX2	targeting protein for Xklp2
Q92522	K11275	H1_5	histone H1/5
P00533	K04361	EGFR, ERBB1	epidermal growth factor receptor [EC:2.7.10.1]	ko01521	EGFR tyrosine kinase inhibitor resistance	http://www.kegg.jp/kegg-bin/show_pathway?ko01521+K04361
P00533	K04361	EGFR, ERBB1	epidermal growth factor receptor [EC:2.7.10.1]	ko01522	Endocrine resistance	http://www.kegg.jp/kegg-bin/show_pathway?ko01522+K04361
P00533	K04361	EGFR, ERBB1	epidermal growth factor receptor [EC:2.7.10.1]	ko04010	MAPK signaling pathway	http://www.kegg.jp/kegg-bin/show_pathway?ko04010+K04361
P00533	K04361	EGFR, ERBB1	epidermal growth factor receptor [EC:2.7.10.1]	ko04012	ErbB signaling pathway	http://www.kegg.jp/kegg-bin/show_pathway?ko04012+K04361
P00533	K04361	EGFR, ERBB1	epidermal growth factor receptor [EC:2.7.10.1]	ko04013	MAPK signaling pathway - fly	http://www.kegg.jp/kegg-bin/show_pathway?ko04013+K04361
P00533	K04361	EGFR, ERBB1	epidermal growth factor receptor [EC:2.7.10.1]	ko04014	Ras signaling pathway	http://www.kegg.jp/kegg-bin/show_pathway?ko04014+K04361
P00533	K04361	EGFR, ERBB1	epidermal growth factor receptor [EC:2.7.10.1]	ko04015	Rap1 signaling pathway	http://www.kegg.jp/kegg-bin/show_pathway?ko04015+K04361
P00533	K04361	EGFR, ERBB1	epidermal growth factor receptor [EC:2.7.10.1]	ko04020	Calcium signaling pathway	http://www.kegg.jp/kegg-bin/show_pathway?ko04020+K04361
P00533	K04361	EGFR, ERBB1	epidermal growth factor receptor [EC:2.7.10.1]	ko04066	HIF-1 signaling pathway	http://www.kegg.jp/kegg-bin/show_pathway?ko04066+K04361
P00533	K04361	EGFR, ERBB1	epidermal growth factor receptor [EC:2.7.10.1]	ko04068	FoxO signaling pathway	http://www.kegg.jp/kegg-bin/show_pathway?ko04068+K04361
P00533	K04361	EGFR, ERBB1	epidermal growth factor receptor [EC:2.7.10.1]	ko04072	Phospholipase D signaling pathway	http://www.kegg.jp/kegg-bin/show_pathway?ko04072+K04361
P00533	K04361	EGFR, ERBB1	epidermal growth factor receptor [EC:2.7.10.1]	ko04144	Endocytosis	http://www.kegg.jp/kegg-bin/show_pathway?ko04144+K04361
P00533	K04361	EGFR, ERBB1	epidermal growth factor receptor [EC:2.7.10.1]	ko04151	PI3K-Akt signaling pathway	http://www.kegg.jp/kegg-bin/show_pathway?ko04151+K04361
P00533	K04361	EGFR, ERBB1	epidermal growth factor receptor [EC:2.7.10.1]	ko04214	Apoptosis - fly	http://www.kegg.jp/kegg-bin/show_pathway?ko04214+K04361
P00533	K04361	EGFR, ERBB1	epidermal growth factor receptor [EC:2.7.10.1]	ko04320	Dorso-ventral axis formation	http://www.kegg.jp/kegg-bin/show_pathway?ko04320+K04361
P00533	K04361	EGFR, ERBB1	epidermal growth factor receptor [EC:2.7.10.1]	ko04510	Focal adhesion	http://www.kegg.jp/kegg-bin/show_pathway?ko04510+K04361
P00533	K04361	EGFR, ERBB1	epidermal growth factor receptor [EC:2.7.10.1]	ko04520	Adherens junction	http://www.kegg.jp/kegg-bin/show_pathway?ko04520+K04361
P00533	K04361	EGFR, ERBB1	epidermal growth factor receptor [EC:2.7.10.1]	ko04540	Gap junction	http://www.kegg.jp/kegg-bin/show_pathway?ko04540+K04361
P00533	K04361	EGFR, ERBB1	epidermal growth factor receptor [EC:2.7.10.1]	ko04630	JAK-STAT signaling pathway	http://www.kegg.jp/kegg-bin/show_pathway?ko04630+K04361
P00533	K04361	EGFR, ERBB1	epidermal growth factor receptor [EC:2.7.10.1]	ko04810	Regulation of actin cytoskeleton	http://www.kegg.jp/kegg-bin/show_pathway?ko04810+K04361
P00533	K04361	EGFR, ERBB1	epidermal growth factor receptor [EC:2.7.10.1]	ko04912	GnRH signaling pathway	http://www.kegg.jp/kegg-bin/show_pathway?ko04912+K04361
P00533	K04361	EGFR, ERBB1	epidermal growth factor receptor [EC:2.7.10.1]	ko04915	Estrogen signaling pathway	http://www.kegg.jp/kegg-bin/show_pathway?ko04915+K04361
P00533	K04361	EGFR, ERBB1	epidermal growth factor receptor [EC:2.7.10.1]	ko04921	Oxytocin signaling pathway	http://www.kegg.jp/kegg-bin/show_pathway?ko04921+K04361
P00533	K04361	EGFR, ERBB1	epidermal growth factor receptor [EC:2.7.10.1]	ko04926	Relaxin signaling pathway	http://www.kegg.jp/kegg-bin/show_pathway?ko04926+K04361
P00533	K04361	EGFR, ERBB1	epidermal growth factor receptor [EC:2.7.10.1]	ko04928	Parathyroid hormone synthesis, secretion and action	http://www.kegg.jp/kegg-bin/show_pathway?ko04928+K04361
P00533	K04361	EGFR, ERBB1	epidermal growth factor receptor [EC:2.7.10.1]	ko04934	Cushing syndrome	http://www.kegg.jp/kegg-bin/show_pathway?ko04934+K04361
P00533	K04361	EGFR, ERBB1	epidermal growth factor receptor [EC:2.7.10.1]	ko05120	Epithelial cell signaling in Helicobacter pylori infection	http://www.kegg.jp/kegg-bin/show_pathway?ko05120+K04361
P00533	K04361	EGFR, ERBB1	epidermal growth factor receptor [EC:2.7.10.1]	ko05131	Shigellosis	http://www.kegg.jp/kegg-bin/show_pathway?ko05131+K04361
P00533	K04361	EGFR, ERBB1	epidermal growth factor receptor [EC:2.7.10.1]	ko05160	Hepatitis C	http://www.kegg.jp/kegg-bin/show_pathway?ko05160+K04361
P00533	K04361	EGFR, ERBB1	epidermal growth factor receptor [EC:2.7.10.1]	ko05163	Human cytomegalovirus infection	http://www.kegg.jp/kegg-bin/show_pathway?ko05163+K04361
P00533	K04361	EGFR, ERBB1	epidermal growth factor receptor [EC:2.7.10.1]	ko05165	Human papillomavirus infection	http://www.kegg.jp/kegg-bin/show_pathway?ko05165+K04361
P00533	K04361	EGFR, ERBB1	epidermal growth factor receptor [EC:2.7.10.1]	ko05200	Pathways in cancer	http://www.kegg.jp/kegg-bin/show_pathway?ko05200+K04361
P00533	K04361	EGFR, ERBB1	epidermal growth factor receptor [EC:2.7.10.1]	ko05205	Proteoglycans in cancer	http://www.kegg.jp/kegg-bin/show_pathway?ko05205+K04361
P00533	K04361	EGFR, ERBB1	epidermal growth factor receptor [EC:2.7.10.1]	ko05206	MicroRNAs in cancer	http://www.kegg.jp/kegg-bin/show_pathway?ko05206+K04361
P00533	K04361	EGFR, ERBB1	epidermal growth factor receptor [EC:2.7.10.1]	ko05210	Colorectal cancer	http://www.kegg.jp/kegg-bin/show_pathway?ko05210+K04361
P00533	K04361	EGFR, ERBB1	epidermal growth factor receptor [EC:2.7.10.1]	ko05212	Pancreatic cancer	http://www.kegg.jp/kegg-bin/show_pathway?ko05212+K04361
P00533	K04361	EGFR, ERBB1	epidermal growth factor receptor [EC:2.7.10.1]	ko05213	Endometrial cancer	http://www.kegg.jp/kegg-bin/show_pathway?ko05213+K04361
P00533	K04361	EGFR, ERBB1	epidermal growth factor receptor [EC:2.7.10.1]	ko05214	Glioma	http://www.kegg.jp/kegg-bin/show_pathway?ko05214+K04361
P00533	K04361	EGFR, ERBB1	epidermal growth factor receptor [EC:2.7.10.1]	ko05215	Prostate cancer	http://www.kegg.jp/kegg-bin/show_pathway?ko05215+K04361
P00533	K04361	EGFR, ERBB1	epidermal growth factor receptor [EC:2.7.10.1]	ko05218	Melanoma	http://www.kegg.jp/kegg-bin/show_pathway?ko05218+K04361
P00533	K04361	EGFR, ERBB1	epidermal growth factor receptor [EC:2.7.10.1]	ko05219	Bladder cancer	http://www.kegg.jp/kegg-bin/show_pathway?ko05219+K04361
P00533	K04361	EGFR, ERBB1	epidermal growth factor receptor [EC:2.7.10.1]	ko05223	Non-small cell lung cancer	http://www.kegg.jp/kegg-bin/show_pathway?ko05223+K04361
P00533	K04361	EGFR, ERBB1	epidermal growth factor receptor [EC:2.7.10.1]	ko05224	Breast cancer	http://www.kegg.jp/kegg-bin/show_pathway?ko05224+K04361
P00533	K04361	EGFR, ERBB1	epidermal growth factor receptor [EC:2.7.10.1]	ko05225	Hepatocellular carcinoma	http://www.kegg.jp/kegg-bin/show_pathway?ko05225+K04361
P00533	K04361	EGFR, ERBB1	epidermal growth factor receptor [EC:2.7.10.1]	ko05226	Gastric cancer	http://www.kegg.jp/kegg-bin/show_pathway?ko05226+K04361
P00533	K04361	EGFR, ERBB1	epidermal growth factor receptor [EC:2.7.10.1]	ko05230	Central carbon metabolism in cancer	http://www.kegg.jp/kegg-bin/show_pathway?ko05230+K04361
P00533	K04361	EGFR, ERBB1	epidermal growth factor receptor [EC:2.7.10.1]	ko05231	Choline metabolism in cancer	http://www.kegg.jp/kegg-bin/show_pathway?ko05231+K04361
P00533	K04361	EGFR, ERBB1	epidermal growth factor receptor [EC:2.7.10.1]	ko05235	PD-L1 expression and PD-1 checkpoint pathway in cancer	http://www.kegg.jp/kegg-bin/show_pathway?ko05235+K04361
P68431	K11253	H3	histone H3	ko05034	Alcoholism	http://www.kegg.jp/kegg-bin/show_pathway?ko05034+K11253
P68431	K11253	H3	histone H3	ko05131	Shigellosis	http://www.kegg.jp/kegg-bin/show_pathway?ko05131+K11253
P68431	K11253	H3	histone H3	ko05202	Transcriptional misregulation in cancer	http://www.kegg.jp/kegg-bin/show_pathway?ko05202+K11253
P68431	K11253	H3	histone H3	ko05322	Systemic lupus erythematosus	http://www.kegg.jp/kegg-bin/show_pathway?ko05322+K11253
Q96T88	K10638	UHRF1, NP95	E3 ubiquitin-protein ligase UHRF1 [EC:2.3.2.27]
P00918	K18245	CA2	carbonic anhydrase 2 [EC:4.2.1.1]	ko00910	Nitrogen metabolism	http://www.kegg.jp/kegg-bin/show_pathway?ko00910+K18245
P00918	K18245	CA2	carbonic anhydrase 2 [EC:4.2.1.1]	ko01100	Metabolic pathways	http://www.kegg.jp/kegg-bin/show_pathway?ko01100+K18245
P00918	K18245	CA2	carbonic anhydrase 2 [EC:4.2.1.1]	ko04964	Proximal tubule bicarbonate reclamation	http://www.kegg.jp/kegg-bin/show_pathway?ko04964+K18245
P00918	K18245	CA2	carbonic anhydrase 2 [EC:4.2.1.1]	ko04966	Collecting duct acid secretion	http://www.kegg.jp/kegg-bin/show_pathway?ko04966+K18245
P00918	K18245	CA2	carbonic anhydrase 2 [EC:4.2.1.1]	ko04971	Gastric acid secretion	http://www.kegg.jp/kegg-bin/show_pathway?ko04971+K18245
P00918	K18245	CA2	carbonic anhydrase 2 [EC:4.2.1.1]	ko04972	Pancreatic secretion	http://www.kegg.jp/kegg-bin/show_pathway?ko04972+K18245
P00918	K18245	CA2	carbonic anhydrase 2 [EC:4.2.1.1]	ko04976	Bile secretion	http://www.kegg.jp/kegg-bin/show_pathway?ko04976+K18245
O95235	K10402	KIF20	kinesin family member 20
Q96FF9	K17390	CDCA5	sororin	ko05206	MicroRNAs in cancer	http://www.kegg.jp/kegg-bin/show_pathway?ko05206+K17390
Q5TEZ5
Q8IUE6	K11251	H2A	histone H2A	ko04217	Necroptosis	http://www.kegg.jp/kegg-bin/show_pathway?ko04217+K11251
Q8IUE6	K11251	H2A	histone H2A	ko05034	Alcoholism	http://www.kegg.jp/kegg-bin/show_pathway?ko05034+K11251
Q8IUE6	K11251	H2A	histone H2A	ko05322	Systemic lupus erythematosus	http://www.kegg.jp/kegg-bin/show_pathway?ko05322+K11251
P50502	K09560	ST13	suppressor of tumorigenicity protein 13
Q9Y324	K14566	UTP24, FCF1	U3 small nucleolar RNA-associated protein 24	ko03008	Ribosome biogenesis in eukaryotes	http://www.kegg.jp/kegg-bin/show_pathway?ko03008+K14566
Q53GA4	Q53GA4
Q9UNW9	K14944	NOVA	RNA-binding protein Nova
P15531	K00940	ndk, NME	nucleoside-diphosphate kinase [EC:2.7.4.6]	ko00230	Purine metabolism	http://www.kegg.jp/kegg-bin/show_pathway?ko00230+K00940
P15531	K00940	ndk, NME	nucleoside-diphosphate kinase [EC:2.7.4.6]	ko00240	Pyrimidine metabolism	http://www.kegg.jp/kegg-bin/show_pathway?ko00240+K00940
P15531	K00940	ndk, NME	nucleoside-diphosphate kinase [EC:2.7.4.6]	ko00983	Drug metabolism - other enzymes	http://www.kegg.jp/kegg-bin/show_pathway?ko00983+K00940
P15531	K00940	ndk, NME	nucleoside-diphosphate kinase [EC:2.7.4.6]	ko01100	Metabolic pathways	http://www.kegg.jp/kegg-bin/show_pathway?ko01100+K00940
P15531	K00940	ndk, NME	nucleoside-diphosphate kinase [EC:2.7.4.6]	ko01110	Biosynthesis of secondary metabolites	http://www.kegg.jp/kegg-bin/show_pathway?ko01110+K00940
P15531	K00940	ndk, NME	nucleoside-diphosphate kinase [EC:2.7.4.6]	ko04016	MAPK signaling pathway - plant	http://www.kegg.jp/kegg-bin/show_pathway?ko04016+K00940
Q6FI13	K11251	H2A	histone H2A	ko04217	Necroptosis	http://www.kegg.jp/kegg-bin/show_pathway?ko04217+K11251
Q6FI13	K11251	H2A	histone H2A	ko05034	Alcoholism	http://www.kegg.jp/kegg-bin/show_pathway?ko05034+K11251
Q6FI13	K11251	H2A	histone H2A	ko05322	Systemic lupus erythematosus	http://www.kegg.jp/kegg-bin/show_pathway?ko05322+K11251
Q15147	K05858	PLCB	phosphatidylinositol phospholipase C, beta [EC:3.1.4.11]	ko00562	Inositol phosphate metabolism	http://www.kegg.jp/kegg-bin/show_pathway?ko00562+K05858
Q15147	K05858	PLCB	phosphatidylinositol phospholipase C, beta [EC:3.1.4.11]	ko01100	Metabolic pathways	http://www.kegg.jp/kegg-bin/show_pathway?ko01100+K05858
Q15147	K05858	PLCB	phosphatidylinositol phospholipase C, beta [EC:3.1.4.11]	ko04015	Rap1 signaling pathway	http://www.kegg.jp/kegg-bin/show_pathway?ko04015+K05858
Q15147	K05858	PLCB	phosphatidylinositol phospholipase C, beta [EC:3.1.4.11]	ko04020	Calcium signaling pathway	http://www.kegg.jp/kegg-bin/show_pathway?ko04020+K05858
Q15147	K05858	PLCB	phosphatidylinositol phospholipase C, beta [EC:3.1.4.11]	ko04022	cGMP-PKG signaling pathway	http://www.kegg.jp/kegg-bin/show_pathway?ko04022+K05858
Q15147	K05858	PLCB	phosphatidylinositol phospholipase C, beta [EC:3.1.4.11]	ko04062	Chemokine signaling pathway	http://www.kegg.jp/kegg-bin/show_pathway?ko04062+K05858
Q15147	K05858	PLCB	phosphatidylinositol phospholipase C, beta [EC:3.1.4.11]	ko04070	Phosphatidylinositol signaling system	http://www.kegg.jp/kegg-bin/show_pathway?ko04070+K05858
Q15147	K05858	PLCB	phosphatidylinositol phospholipase C, beta [EC:3.1.4.11]	ko04071	Sphingolipid signaling pathway	http://www.kegg.jp/kegg-bin/show_pathway?ko04071+K05858
Q15147	K05858	PLCB	phosphatidylinositol phospholipase C, beta [EC:3.1.4.11]	ko04072	Phospholipase D signaling pathway	http://www.kegg.jp/kegg-bin/show_pathway?ko04072+K05858
Q15147	K05858	PLCB	phosphatidylinositol phospholipase C, beta [EC:3.1.4.11]	ko04261	Adrenergic signaling in cardiomyocytes	http://www.kegg.jp/kegg-bin/show_pathway?ko04261+K05858
Q15147	K05858	PLCB	phosphatidylinositol phospholipase C, beta [EC:3.1.4.11]	ko04270	Vascular smooth muscle contraction	http://www.kegg.jp/kegg-bin/show_pathway?ko04270+K05858
Q15147	K05858	PLCB	phosphatidylinositol phospholipase C, beta [EC:3.1.4.11]	ko04310	Wnt signaling pathway	http://www.kegg.jp/kegg-bin/show_pathway?ko04310+K05858
Q15147	K05858	PLCB	phosphatidylinositol phospholipase C, beta [EC:3.1.4.11]	ko04361	Axon regeneration	http://www.kegg.jp/kegg-bin/show_pathway?ko04361+K05858
Q15147	K05858	PLCB	phosphatidylinositol phospholipase C, beta [EC:3.1.4.11]	ko04371	Apelin signaling pathway	http://www.kegg.jp/kegg-bin/show_pathway?ko04371+K05858
Q15147	K05858	PLCB	phosphatidylinositol phospholipase C, beta [EC:3.1.4.11]	ko04540	Gap junction	http://www.kegg.jp/kegg-bin/show_pathway?ko04540+K05858
Q15147	K05858	PLCB	phosphatidylinositol phospholipase C, beta [EC:3.1.4.11]	ko04611	Platelet activation	http://www.kegg.jp/kegg-bin/show_pathway?ko04611+K05858
Q15147	K05858	PLCB	phosphatidylinositol phospholipase C, beta [EC:3.1.4.11]	ko04621	NOD-like receptor signaling pathway	http://www.kegg.jp/kegg-bin/show_pathway?ko04621+K05858
Q15147	K05858	PLCB	phosphatidylinositol phospholipase C, beta [EC:3.1.4.11]	ko04713	Circadian entrainment	http://www.kegg.jp/kegg-bin/show_pathway?ko04713+K05858
Q15147	K05858	PLCB	phosphatidylinositol phospholipase C, beta [EC:3.1.4.11]	ko04720	Long-term potentiation	http://www.kegg.jp/kegg-bin/show_pathway?ko04720+K05858
Q15147	K05858	PLCB	phosphatidylinositol phospholipase C, beta [EC:3.1.4.11]	ko04723	Retrograde endocannabinoid signaling	http://www.kegg.jp/kegg-bin/show_pathway?ko04723+K05858
Q15147	K05858	PLCB	phosphatidylinositol phospholipase C, beta [EC:3.1.4.11]	ko04724	Glutamatergic synapse	http://www.kegg.jp/kegg-bin/show_pathway?ko04724+K05858
Q15147	K05858	PLCB	phosphatidylinositol phospholipase C, beta [EC:3.1.4.11]	ko04725	Cholinergic synapse	http://www.kegg.jp/kegg-bin/show_pathway?ko04725+K05858
Q15147	K05858	PLCB	phosphatidylinositol phospholipase C, beta [EC:3.1.4.11]	ko04726	Serotonergic synapse	http://www.kegg.jp/kegg-bin/show_pathway?ko04726+K05858
Q15147	K05858	PLCB	phosphatidylinositol phospholipase C, beta [EC:3.1.4.11]	ko04728	Dopaminergic synapse	http://www.kegg.jp/kegg-bin/show_pathway?ko04728+K05858
Q15147	K05858	PLCB	phosphatidylinositol phospholipase C, beta [EC:3.1.4.11]	ko04730	Long-term depression	http://www.kegg.jp/kegg-bin/show_pathway?ko04730+K05858
Q15147	K05858	PLCB	phosphatidylinositol phospholipase C, beta [EC:3.1.4.11]	ko04745	Phototransduction - fly	http://www.kegg.jp/kegg-bin/show_pathway?ko04745+K05858
Q15147	K05858	PLCB	phosphatidylinositol phospholipase C, beta [EC:3.1.4.11]	ko04750	Inflammatory mediator regulation of TRP channels	http://www.kegg.jp/kegg-bin/show_pathway?ko04750+K05858
Q15147	K05858	PLCB	phosphatidylinositol phospholipase C, beta [EC:3.1.4.11]	ko04911	Insulin secretion	http://www.kegg.jp/kegg-bin/show_pathway?ko04911+K05858
Q15147	K05858	PLCB	phosphatidylinositol phospholipase C, beta [EC:3.1.4.11]	ko04912	GnRH signaling pathway	http://www.kegg.jp/kegg-bin/show_pathway?ko04912+K05858
Q15147	K05858	PLCB	phosphatidylinositol phospholipase C, beta [EC:3.1.4.11]	ko04915	Estrogen signaling pathway	http://www.kegg.jp/kegg-bin/show_pathway?ko04915+K05858
Q15147	K05858	PLCB	phosphatidylinositol phospholipase C, beta [EC:3.1.4.11]	ko04916	Melanogenesis	http://www.kegg.jp/kegg-bin/show_pathway?ko04916+K05858
Q15147	K05858	PLCB	phosphatidylinositol phospholipase C, beta [EC:3.1.4.11]	ko04918	Thyroid hormone synthesis	http://www.kegg.jp/kegg-bin/show_pathway?ko04918+K05858
Q15147	K05858	PLCB	phosphatidylinositol phospholipase C, beta [EC:3.1.4.11]	ko04919	Thyroid hormone signaling pathway	http://www.kegg.jp/kegg-bin/show_pathway?ko04919+K05858
Q15147	K05858	PLCB	phosphatidylinositol phospholipase C, beta [EC:3.1.4.11]	ko04921	Oxytocin signaling pathway	http://www.kegg.jp/kegg-bin/show_pathway?ko04921+K05858
Q15147	K05858	PLCB	phosphatidylinositol phospholipase C, beta [EC:3.1.4.11]	ko04922	Glucagon signaling pathway	http://www.kegg.jp/kegg-bin/show_pathway?ko04922+K05858
Q15147	K05858	PLCB	phosphatidylinositol phospholipase C, beta [EC:3.1.4.11]	ko04924	Renin secretion	http://www.kegg.jp/kegg-bin/show_pathway?ko04924+K05858
Q15147	K05858	PLCB	phosphatidylinositol phospholipase C, beta [EC:3.1.4.11]	ko04925	Aldosterone synthesis and secretion	http://www.kegg.jp/kegg-bin/show_pathway?ko04925+K05858
Q15147	K05858	PLCB	phosphatidylinositol phospholipase C, beta [EC:3.1.4.11]	ko04926	Relaxin signaling pathway	http://www.kegg.jp/kegg-bin/show_pathway?ko04926+K05858
Q15147	K05858	PLCB	phosphatidylinositol phospholipase C, beta [EC:3.1.4.11]	ko04927	Cortisol synthesis and secretion	http://www.kegg.jp/kegg-bin/show_pathway?ko04927+K05858
Q15147	K05858	PLCB	phosphatidylinositol phospholipase C, beta [EC:3.1.4.11]	ko04928	Parathyroid hormone synthesis, secretion and action	http://www.kegg.jp/kegg-bin/show_pathway?ko04928+K05858
Q15147	K05858	PLCB	phosphatidylinositol phospholipase C, beta [EC:3.1.4.11]	ko04929	GnRH secretion	http://www.kegg.jp/kegg-bin/show_pathway?ko04929+K05858
Q15147	K05858	PLCB	phosphatidylinositol phospholipase C, beta [EC:3.1.4.11]	ko04933	AGE-RAGE signaling pathway in diabetic complications	http://www.kegg.jp/kegg-bin/show_pathway?ko04933+K05858
Q15147	K05858	PLCB	phosphatidylinositol phospholipase C, beta [EC:3.1.4.11]	ko04934	Cushing syndrome	http://www.kegg.jp/kegg-bin/show_pathway?ko04934+K05858
Q15147	K05858	PLCB	phosphatidylinositol phospholipase C, beta [EC:3.1.4.11]	ko04935	Growth hormone synthesis, secretion and action	http://www.kegg.jp/kegg-bin/show_pathway?ko04935+K05858
Q15147	K05858	PLCB	phosphatidylinositol phospholipase C, beta [EC:3.1.4.11]	ko04961	Endocrine and other factor-regulated calcium reabsorption	http://www.kegg.jp/kegg-bin/show_pathway?ko04961+K05858
Q15147	K05858	PLCB	phosphatidylinositol phospholipase C, beta [EC:3.1.4.11]	ko04970	Salivary secretion	http://www.kegg.jp/kegg-bin/show_pathway?ko04970+K05858
Q15147	K05858	PLCB	phosphatidylinositol phospholipase C, beta [EC:3.1.4.11]	ko04971	Gastric acid secretion	http://www.kegg.jp/kegg-bin/show_pathway?ko04971+K05858
Q15147	K05858	PLCB	phosphatidylinositol phospholipase C, beta [EC:3.1.4.11]	ko04972	Pancreatic secretion	http://www.kegg.jp/kegg-bin/show_pathway?ko04972+K05858
Q15147	K05858	PLCB	phosphatidylinositol phospholipase C, beta [EC:3.1.4.11]	ko04973	Carbohydrate digestion and absorption	http://www.kegg.jp/kegg-bin/show_pathway?ko04973+K05858
Q15147	K05858	PLCB	phosphatidylinositol phospholipase C, beta [EC:3.1.4.11]	ko05010	Alzheimer disease	http://www.kegg.jp/kegg-bin/show_pathway?ko05010+K05858
Q15147	K05858	PLCB	phosphatidylinositol phospholipase C, beta [EC:3.1.4.11]	ko05016	Huntington disease	http://www.kegg.jp/kegg-bin/show_pathway?ko05016+K05858
Q15147	K05858	PLCB	phosphatidylinositol phospholipase C, beta [EC:3.1.4.11]	ko05017	Spinocerebellar ataxia	http://www.kegg.jp/kegg-bin/show_pathway?ko05017+K05858
Q15147	K05858	PLCB	phosphatidylinositol phospholipase C, beta [EC:3.1.4.11]	ko05131	Shigellosis	http://www.kegg.jp/kegg-bin/show_pathway?ko05131+K05858
Q15147	K05858	PLCB	phosphatidylinositol phospholipase C, beta [EC:3.1.4.11]	ko05142	Chagas disease (American trypanosomiasis)	http://www.kegg.jp/kegg-bin/show_pathway?ko05142+K05858
Q15147	K05858	PLCB	phosphatidylinositol phospholipase C, beta [EC:3.1.4.11]	ko05143	African trypanosomiasis	http://www.kegg.jp/kegg-bin/show_pathway?ko05143+K05858
Q15147	K05858	PLCB	phosphatidylinositol phospholipase C, beta [EC:3.1.4.11]	ko05146	Amoebiasis	http://www.kegg.jp/kegg-bin/show_pathway?ko05146+K05858
Q15147	K05858	PLCB	phosphatidylinositol phospholipase C, beta [EC:3.1.4.11]	ko05163	Human cytomegalovirus infection	http://www.kegg.jp/kegg-bin/show_pathway?ko05163+K05858
Q15147	K05858	PLCB	phosphatidylinositol phospholipase C, beta [EC:3.1.4.11]	ko05200	Pathways in cancer	http://www.kegg.jp/kegg-bin/show_pathway?ko05200+K05858
P04818	K00560	thyA, TYMS	thymidylate synthase [EC:2.1.1.45]	ko00240	Pyrimidine metabolism	http://www.kegg.jp/kegg-bin/show_pathway?ko00240+K00560
P04818	K00560	thyA, TYMS	thymidylate synthase [EC:2.1.1.45]	ko00670	One carbon pool by folate	http://www.kegg.jp/kegg-bin/show_pathway?ko00670+K00560
P04818	K00560	thyA, TYMS	thymidylate synthase [EC:2.1.1.45]	ko01100	Metabolic pathways	http://www.kegg.jp/kegg-bin/show_pathway?ko01100+K00560
P04818	K00560	thyA, TYMS	thymidylate synthase [EC:2.1.1.45]	ko01523	Antifolate resistance	http://www.kegg.jp/kegg-bin/show_pathway?ko01523+K00560
P10412	K11275	H1_5	histone H1/5
P42025	K16575	ACTR1, ARP1	centractin	ko05016	Huntington disease	http://www.kegg.jp/kegg-bin/show_pathway?ko05016+K16575
P16403	K11275	H1_5	histone H1/5
Q9H939	K20124	PSTPIP2	proline-serine-threonine phosphatase interacting protein 2
Q9BXS6
Q58FF6	K04079	HSP90A, htpG	molecular chaperone HtpG	ko04141	Protein processing in endoplasmic reticulum	http://www.kegg.jp/kegg-bin/show_pathway?ko04141+K04079
Q58FF6	K04079	HSP90A, htpG	molecular chaperone HtpG	ko04151	PI3K-Akt signaling pathway	http://www.kegg.jp/kegg-bin/show_pathway?ko04151+K04079
Q58FF6	K04079	HSP90A, htpG	molecular chaperone HtpG	ko04217	Necroptosis	http://www.kegg.jp/kegg-bin/show_pathway?ko04217+K04079
Q58FF6	K04079	HSP90A, htpG	molecular chaperone HtpG	ko04612	Antigen processing and presentation	http://www.kegg.jp/kegg-bin/show_pathway?ko04612+K04079
Q58FF6	K04079	HSP90A, htpG	molecular chaperone HtpG	ko04621	NOD-like receptor signaling pathway	http://www.kegg.jp/kegg-bin/show_pathway?ko04621+K04079
Q58FF6	K04079	HSP90A, htpG	molecular chaperone HtpG	ko04626	Plant-pathogen interaction	http://www.kegg.jp/kegg-bin/show_pathway?ko04626+K04079
Q58FF6	K04079	HSP90A, htpG	molecular chaperone HtpG	ko04657	IL-17 signaling pathway	http://www.kegg.jp/kegg-bin/show_pathway?ko04657+K04079
Q58FF6	K04079	HSP90A, htpG	molecular chaperone HtpG	ko04659	Th17 cell differentiation	http://www.kegg.jp/kegg-bin/show_pathway?ko04659+K04079
Q58FF6	K04079	HSP90A, htpG	molecular chaperone HtpG	ko04914	Progesterone-mediated oocyte maturation	http://www.kegg.jp/kegg-bin/show_pathway?ko04914+K04079
Q58FF6	K04079	HSP90A, htpG	molecular chaperone HtpG	ko04915	Estrogen signaling pathway	http://www.kegg.jp/kegg-bin/show_pathway?ko04915+K04079
Q58FF6	K04079	HSP90A, htpG	molecular chaperone HtpG	ko05132	Salmonella infection	http://www.kegg.jp/kegg-bin/show_pathway?ko05132+K04079
Q58FF6	K04079	HSP90A, htpG	molecular chaperone HtpG	ko05200	Pathways in cancer	http://www.kegg.jp/kegg-bin/show_pathway?ko05200+K04079
Q58FF6	K04079	HSP90A, htpG	molecular chaperone HtpG	ko05215	Prostate cancer	http://www.kegg.jp/kegg-bin/show_pathway?ko05215+K04079
Q58FF6	K04079	HSP90A, htpG	molecular chaperone HtpG	ko05418	Fluid shear stress and atherosclerosis	http://www.kegg.jp/kegg-bin/show_pathway?ko05418+K04079
Q96F63
O00767	K00507	SCD, desC	stearoyl-CoA desaturase (Delta-9 desaturase) [EC:1.14.19.1]	ko01040	Biosynthesis of unsaturated fatty acids	http://www.kegg.jp/kegg-bin/show_pathway?ko01040+K00507
O00767	K00507	SCD, desC	stearoyl-CoA desaturase (Delta-9 desaturase) [EC:1.14.19.1]	ko01100	Metabolic pathways	http://www.kegg.jp/kegg-bin/show_pathway?ko01100+K00507
O00767	K00507	SCD, desC	stearoyl-CoA desaturase (Delta-9 desaturase) [EC:1.14.19.1]	ko01212	Fatty acid metabolism	http://www.kegg.jp/kegg-bin/show_pathway?ko01212+K00507
O00767	K00507	SCD, desC	stearoyl-CoA desaturase (Delta-9 desaturase) [EC:1.14.19.1]	ko03320	PPAR signaling pathway	http://www.kegg.jp/kegg-bin/show_pathway?ko03320+K00507
O00767	K00507	SCD, desC	stearoyl-CoA desaturase (Delta-9 desaturase) [EC:1.14.19.1]	ko04152	AMPK signaling pathway	http://www.kegg.jp/kegg-bin/show_pathway?ko04152+K00507
O00767	K00507	SCD, desC	stearoyl-CoA desaturase (Delta-9 desaturase) [EC:1.14.19.1]	ko04212	Longevity regulating pathway - worm	http://www.kegg.jp/kegg-bin/show_pathway?ko04212+K00507
Q16533	K15208	SNAPC1	snRNA-activating protein complex subunit 1

## Sheet: map2query
Map ID	Map Name	Seqs	#Seqs	URL
ko04212	Longevity regulating pathway - worm	P02795 P04732 P04179 P80297 O95166 P42345 O00767	7	http://www.kegg.jp/kegg-bin/show_pathway?ko04212+K14739+K14739+K04564+K14739+K08341+K07203+K00507
ko04978	Mineral absorption	P02795 P04732 P80297 P23634 P09601	5	http://www.kegg.jp/kegg-bin/show_pathway?ko04978+K14739+K14739+K14739+K05850+K00510
ko05202	Transcriptional misregulation in cancer	P52926 P00749 Q16611 O43278 P20248 Q71DI3 P68431	7	http://www.kegg.jp/kegg-bin/show_pathway?ko05202+K09283+K01348+K14021+K15619+K06627+K11253+K11253
ko05206	MicroRNAs in cancer	P52926 P00749 P08183 P09493 Q16611 P42345 P08648 P04049 P09601 P26358 P24821 P35625 P00533 Q96FF9	14	http://www.kegg.jp/kegg-bin/show_pathway?ko05206+K09283+K01348+K05658+K10373+K14021+K07203+K06484+K04366+K00510+K00558+K06252+K16866+K04361+K17390
ko04066	HIF-1 signaling pathway	P05121 Q2TB90 P09104 P42345 P09601 P00533	6	http://www.kegg.jp/kegg-bin/show_pathway?ko04066+K03982+K00844+K01689+K07203+K00510+K04361
ko04115	p53 signaling pathway	P05121 P27701 P31947 Q96PM5 Q658P3 P14635	6	http://www.kegg.jp/kegg-bin/show_pathway?ko04115+K03982+K06509+K06644+K10144+K10142+K05868
ko04218	Cellular senescence	P05121 P10321 P04439 P13747 P42345 P01889 P04049 P20248 P46734 P84022 P12235 P14635	12	http://www.kegg.jp/kegg-bin/show_pathway?ko04218+K03982+K06751+K06751+K06751+K07203+K06751+K04366+K06627+K04432+K23605+K05863+K05868
ko04371	Apelin signaling pathway	P05121 P63218 P22694 O95166 P42345 P04049 P84022 Q00059 Q15147	9	http://www.kegg.jp/kegg-bin/show_pathway?ko04371+K03982+K04542+K04345+K08341+K07203+K04366+K23605+K11830+K05858
ko04390	Hippo signaling pathway	P05121 P15514 Q15334 P84022 P28347	5	http://www.kegg.jp/kegg-bin/show_pathway?ko04390+K03982+K09782+K06094+K23605+K09448
ko04610	Complement and coagulation cascades	P05121 P02679 P00749 P13987	4	http://www.kegg.jp/kegg-bin/show_pathway?ko04610+K03982+K03905+K01348+K04008
ko04933	AGE-RAGE signaling pathway in diabetic complications	P05121 P02751 P01584 P05362 P84022 Q15147	6	http://www.kegg.jp/kegg-bin/show_pathway?ko04933+K03982+K05717+K04519+K06490+K23605+K05858
ko05142	Chagas disease (American trypanosomiasis)	P05121 P01584 Q15147	3	http://www.kegg.jp/kegg-bin/show_pathway?ko05142+K03982+K04519+K05858
ko04722	Neurotrophin signaling pathway	P52566 Q99523 P04049	3	http://www.kegg.jp/kegg-bin/show_pathway?ko04722+K12462+K12388+K04366
ko04962	Vasopressin-regulated water reabsorption	P52566 P20339 P22694 Q12846	4	http://www.kegg.jp/kegg-bin/show_pathway?ko04962+K12462+K07887+K04345+K13502
ko04010	MAPK signaling pathway	Q9BXT2 P01584 Q9Y4G8 P22694 P15514 P04049 P28562 P46734 P29317 P00533	10	http://www.kegg.jp/kegg-bin/show_pathway?ko04010+K04871+K04519+K08018+K04345+K09782+K04366+K21278+K04432+K05103+K04361
ko04260	Cardiac muscle contraction	Q9BXT2 P09493	2	http://www.kegg.jp/kegg-bin/show_pathway?ko04260+K04871+K10373
ko04261	Adrenergic signaling in cardiomyocytes	Q9BXT2 P23634 P22694 P09493 Q15147	5	http://www.kegg.jp/kegg-bin/show_pathway?ko04261+K04871+K05850+K04345+K10373+K05858
ko04921	Oxytocin signaling pathway	Q9BXT2 P22694 P04049 P00533 Q15147	5	http://www.kegg.jp/kegg-bin/show_pathway?ko04921+K04871+K04345+K04366+K04361+K05858
ko05410	Hypertrophic cardiomyopathy (HCM)	Q9BXT2 P17301 P09493 P08648	4	http://www.kegg.jp/kegg-bin/show_pathway?ko05410+K04871+K06481+K10373+K06484
ko05412	Arrhythmogenic right ventricular cardiomyopathy (ARVC)	Q9BXT2 P17301 P08648	3	http://www.kegg.jp/kegg-bin/show_pathway?ko05412+K04871+K06481+K06484
ko05414	Dilated cardiomyopathy (DCM)	Q9BXT2 P17301 P22694 P09493 P08648	5	http://www.kegg.jp/kegg-bin/show_pathway?ko05414+K04871+K06481+K04345+K10373+K06484
ko04360	Axon guidance	O75326 O75093 Q9Y281 P04049 P29317	5	http://www.kegg.jp/kegg-bin/show_pathway?ko04360+K06529+K06838+K05765+K04366+K05103
ko04214	Apoptosis - fly	Q96K17 P20290 P00533	3	http://www.kegg.jp/kegg-bin/show_pathway?ko04214+K01527+K01527+K04361
ko04611	Platelet activation	P02679 P17301 P22694 Q15147	4	http://www.kegg.jp/kegg-bin/show_pathway?ko04611+K03905+K06481+K04345+K05858
ko05150	Staphylococcus aureus infection	P02679 P05362	2	http://www.kegg.jp/kegg-bin/show_pathway?ko05150+K03905+K06490
ko00510	N-Glycan biosynthesis	Q14697 Q9Y673 Q86YN1	3	http://www.kegg.jp/kegg-bin/show_pathway?ko00510+K05546+K00729+K07252
ko01100	Metabolic pathways	Q14697 Q14061 O14495 P23921 Q01432 Q9Y673 Q6PCE3 Q2TB90 P09104 P54803 O00469 P21589 Q8TED1 O94808 O95479 P09467 Q15067 P07203 P07311 Q8NFF5 Q9Y617 Q96C36 P09601 P49748 P16219 P11908 P26358 Q96DG6 P78540 O00483 Q13057 P33316 Q6P9A2 Q9BV57 Q9Y2Z9 P00918 P15531 Q15147 P04818 O00767	40	http://www.kegg.jp/kegg-bin/show_pathway?ko01100+K05546+K02260+K01080+K10807+K01490+K00729+K11809+K00844+K01689+K01202+K13645+K19970+K00432+K00820+K13937+K03841+K00232+K00432+K01512+K00953+K00831+K00286+K00510+K09479+K00248+K00948+K00558+K01061+K01476+K03948+K02318+K01520+K00710+K08967+K06126+K18245+K00940+K05858+K00560+K00507
ko04141	Protein processing in endoplasmic reticulum	Q14697 Q99942 Q96HE7 Q9P2E9 Q16611 Q9UK22 Q15629 Q5VVQ6 Q99933 Q58FF6	10	http://www.kegg.jp/kegg-bin/show_pathway?ko04141+K05546+K10666+K10950+K14000+K14021+K10099+K14010+K13719+K09555+K04079
ko00190	Oxidative phosphorylation	Q14061 O00483	2	http://www.kegg.jp/kegg-bin/show_pathway?ko00190+K02260+K03948
ko04714	Thermogenesis	Q14061 P22694 P42345 P46734 O00483 Q330K2	6	http://www.kegg.jp/kegg-bin/show_pathway?ko04714+K02260+K04345+K07203+K04432+K03948+K18163
ko04640	Hematopoietic cell lineage	P21926 P01584 P17301 P15509 P08648 P13987	6	http://www.kegg.jp/kegg-bin/show_pathway?ko04640+K06460+K04519+K06481+K05066+K06484+K04008
ko04151	PI3K-Akt signaling pathway	P02751 P17301 Q13751 P07942 P63218 P42345 P08648 Q13753 P15514 P04049 P24821 P29317 P00533 Q58FF6	14	http://www.kegg.jp/kegg-bin/show_pathway?ko04151+K05717+K06481+K06244+K05636+K04542+K07203+K06484+K06246+K09782+K04366+K06252+K05103+K04361+K04079
ko04510	Focal adhesion	P02751 P17301 Q13751 P07942 P08648 Q13753 P04049 P24821 P00533	9	http://www.kegg.jp/kegg-bin/show_pathway?ko04510+K05717+K06481+K06244+K05636+K06484+K06246+K04366+K06252+K04361
ko04512	ECM-receptor interaction	P02751 P17301 Q13751 P07942 Q08722 P08648 Q13753 P24821	8	http://www.kegg.jp/kegg-bin/show_pathway?ko04512+K05717+K06481+K06244+K05636+K06266+K06484+K06246+K06252
ko04810	Regulation of actin cytoskeleton	P02751 P17301 Q9Y281 P08648 P04049 P55160 Q8WUW1 P00533	8	http://www.kegg.jp/kegg-bin/show_pathway?ko04810+K05717+K06481+K05765+K06484+K04366+K05750+K05752+K04361
ko05100	Bacterial invasion of epithelial cells	P02751 Q92599 P08648 Q9Y5K6	4	http://www.kegg.jp/kegg-bin/show_pathway?ko05100+K05717+K16939+K06484+K13738
ko05135	Yersinia infection	P02751 P01584 Q14116 P08648 P46734	5	http://www.kegg.jp/kegg-bin/show_pathway?ko05135+K05717+K04519+K05482+K06484+K04432
ko05146	Amoebiasis	P02751 P01584 Q13751 P07942 P20339 P22694 Q13753 P78540 Q15147	9	http://www.kegg.jp/kegg-bin/show_pathway?ko05146+K05717+K04519+K06244+K05636+K07887+K04345+K06246+K01476+K05858
ko05165	Human papillomavirus infection	P02751 P17301 Q13751 P07942 P10321 P04439 P22694 P13747 Q16611 P42345 P08648 Q13753 P01889 P04049 P20248 Q15334 P24821 P00533	18	http://www.kegg.jp/kegg-bin/show_pathway?ko05165+K05717+K06481+K06244+K05636+K06751+K06751+K04345+K06751+K14021+K07203+K06484+K06246+K06751+K04366+K06627+K06094+K06252+K04361
ko05200	Pathways in cancer	P02751 P11234 P17301 P15509 Q13751 P07942 P63218 P22694 Q16611 P42345 Q13753 P04049 P43246 P20248 P09601 P84022 P00533 Q15147 Q58FF6	19	http://www.kegg.jp/kegg-bin/show_pathway?ko05200+K05717+K07835+K06481+K05066+K06244+K05636+K04542+K04345+K14021+K07203+K06246+K04366+K08735+K06627+K00510+K23605+K04361+K05858+K04079
ko05205	Proteoglycans in cancer	P02751 P17301 P00749 P22694 P42345 Q01484 P08648 P04049 P35625 P00533	10	http://www.kegg.jp/kegg-bin/show_pathway?ko05205+K05717+K06481+K01348+K04345+K07203+K10380+K06484+K04366+K16866+K04361
ko05222	Small cell lung cancer	P02751 P17301 Q13751 P07942 Q16611 Q13753	6	http://www.kegg.jp/kegg-bin/show_pathway?ko05222+K05717+K06481+K06244+K05636+K14021+K06246
ko00561	Glycerolipid metabolism	O14495	1	http://www.kegg.jp/kegg-bin/show_pathway?ko00561+K01080
ko00564	Glycerophospholipid metabolism	O14495 P21695	2	http://www.kegg.jp/kegg-bin/show_pathway?ko00564+K01080+K00006
ko00565	Ether lipid metabolism	O14495	1	http://www.kegg.jp/kegg-bin/show_pathway?ko00565+K01080
ko00600	Sphingolipid metabolism	O14495 P54803	2	http://www.kegg.jp/kegg-bin/show_pathway?ko00600+K01080+K01202
ko01110	Biosynthesis of secondary metabolites	O14495 Q01432 Q2TB90 P09104 P21589 P21695 O95479 P09467 Q15067 Q8NFF5 Q9Y617 Q96C36 P09601 P16219 P11908 P78540 Q9Y2Z9 P15531	18	http://www.kegg.jp/kegg-bin/show_pathway?ko01110+K01080+K01490+K00844+K01689+K19970+K00006+K13937+K03841+K00232+K00953+K00831+K00286+K00510+K00248+K00948+K01476+K06126+K00940
ko04072	Phospholipase D signaling pathway	O14495 P11234 P42345 P04049 P00533 Q15147	6	http://www.kegg.jp/kegg-bin/show_pathway?ko04072+K01080+K07835+K07203+K04366+K04361+K05858
ko04666	Fc gamma R-mediated phagocytosis	O14495 Q9Y281 P04049 Q9ULH1	4	http://www.kegg.jp/kegg-bin/show_pathway?ko04666+K01080+K05765+K04366+K12488
ko04975	Fat digestion and absorption	O14495	1	http://www.kegg.jp/kegg-bin/show_pathway?ko04975+K01080
ko05231	Choline metabolism in cancer	O14495 P42345 P04049 P00533	4	http://www.kegg.jp/kegg-bin/show_pathway?ko05231+K01080+K07203+K04366+K04361
ko04013	MAPK signaling pathway - fly	P04179 P46734 Q92766 P00533	4	http://www.kegg.jp/kegg-bin/show_pathway?ko04013+K04564+K04432+K20210+K04361
ko04068	FoxO signaling pathway	P04179 O95166 P04049 P84022 P14635 P53350 P00533	7	http://www.kegg.jp/kegg-bin/show_pathway?ko04068+K04564+K08341+K04366+K23605+K05868+K06631+K04361
ko04146	Peroxisome	P04179 P28288 O14832 Q9UJ83 Q15067 P43155 O14678	7	http://www.kegg.jp/kegg-bin/show_pathway?ko04146+K04564+K05677+K00477+K12261+K00232+K00624+K05678
ko04211	Longevity regulating pathway	P04179 P22694 P42345	3	http://www.kegg.jp/kegg-bin/show_pathway?ko04211+K04564+K04345+K07203
ko04213	Longevity regulating pathway - multiple species	P04179 P22694 P42345	3	http://www.kegg.jp/kegg-bin/show_pathway?ko04213+K04564+K04345+K07203
ko05016	Huntington disease	P04179 Q13885 Q8TED1 P42345 P07203 Q71U36 Q00059 P12235 O00483 P61218 A6NHL2 Q15147 P42025	13	http://www.kegg.jp/kegg-bin/show_pathway?ko05016+K04564+K07375+K00432+K07203+K00432+K07374+K11830+K05863+K03948+K03014+K07374+K05858+K16575
ko04514	Cell adhesion molecules (CAMs)	O95832 P05362 P15151 P10321 P04439 Q9Y624 P13747 O95297 P01889	9	http://www.kegg.jp/kegg-bin/show_pathway?ko04514+K06087+K06490+K06539+K06751+K06751+K06089+K06751+K06770+K06751
ko04530	Tight junction	O95832 Q9Y4G8 P22694 Q9Y624 P46934 Q71U36 Q15334 A6NHL2	8	http://www.kegg.jp/kegg-bin/show_pathway?ko04530+K06087+K08018+K04345+K06089+K10591+K07374+K06094+K07374
ko04670	Leukocyte transendothelial migration	O95832 P05362 Q9Y624	3	http://www.kegg.jp/kegg-bin/show_pathway?ko04670+K06087+K06490+K06089
ko05130	Pathogenic Escherichia coli infection	O95832 Q13885 P01584 Q14116 P49662 Q16611 Q71U36 P55160 A6NHL2 Q8WUW1	10	http://www.kegg.jp/kegg-bin/show_pathway?ko05130+K06087+K07375+K04519+K05482+K04394+K14021+K07374+K05750+K07374+K05752
ko05160	Hepatitis C	O95832 P09914 Q16611 O95786 P04049 P00533	6	http://www.kegg.jp/kegg-bin/show_pathway?ko05160+K06087+K14217+K14021+K12646+K04366+K04361
ko01521	EGFR tyrosine kinase inhibitor resistance	P30530 P42345 P04049 P00533	4	http://www.kegg.jp/kegg-bin/show_pathway?ko01521+K05115+K07203+K04366+K04361
ko04145	Phagosome	Q13885 P17301 P20339 Q03518 P10321 P04439 P13747 Q03519 P08648 P01889 Q71U36 A6NHL2	12	http://www.kegg.jp/kegg-bin/show_pathway?ko04145+K07375+K06481+K07887+K05653+K06751+K06751+K06751+K05654+K06484+K06751+K07374+K07374
ko04540	Gap junction	Q13885 P22694 Q71U36 P04049 A6NHL2 P00533 Q15147	7	http://www.kegg.jp/kegg-bin/show_pathway?ko04540+K07375+K04345+K07374+K04366+K07374+K04361+K05858
ko05010	Alzheimer disease	Q13885 P01584 Q07954 P42345 Q71U36 P04049 P12235 O00483 A6NHL2 Q15147	10	http://www.kegg.jp/kegg-bin/show_pathway?ko05010+K07375+K04519+K04550+K07203+K07374+K04366+K05863+K03948+K07374+K05858
ko05110	Vibrio cholerae infection	Q96HE7 P22694	2	http://www.kegg.jp/kegg-bin/show_pathway?ko05110+K10950+K04345
ko04014	Ras signaling pathway	P11234 P20339 P63218 P22694 P04049 P29317 P00533	7	http://www.kegg.jp/kegg-bin/show_pathway?ko04014+K07835+K07887+K04542+K04345+K04366+K05103+K04361
ko04015	Rap1 signaling pathway	P11234 Q9Y4G8 P04049 P46734 P29317 P00533 Q15147	7	http://www.kegg.jp/kegg-bin/show_pathway?ko04015+K07835+K08018+K04366+K04432+K05103+K04361+K05858
ko05210	Colorectal cancer	P11234 Q16611 P42345 P15514 P04049 P43246 P84022 P00533	8	http://www.kegg.jp/kegg-bin/show_pathway?ko05210+K07835+K14021+K07203+K09782+K04366+K08735+K23605+K04361
ko05212	Pancreatic cancer	P11234 Q16611 P42345 P04049 P84022 P00533	6	http://www.kegg.jp/kegg-bin/show_pathway?ko05212+K07835+K14021+K07203+K04366+K23605+K04361
ko01523	Antifolate resistance	P01584 Q92820 P04818	3	http://www.kegg.jp/kegg-bin/show_pathway?ko01523+K04519+K01307+K00560
ko04060	Cytokine-cytokine receptor interaction	P01584 Q14116 P15509	3	http://www.kegg.jp/kegg-bin/show_pathway?ko04060+K04519+K05482+K05066
ko04064	NF-kappa B signaling pathway	P01584 P00749 P05362 O95786	4	http://www.kegg.jp/kegg-bin/show_pathway?ko04064+K04519+K01348+K06490+K12646
ko04217	Necroptosis	P01584 Q9UQN3 O43633 P12235 Q9Y3E7 Q8IUE6 Q6FI13 Q58FF6	8	http://www.kegg.jp/kegg-bin/show_pathway?ko04217+K04519+K12192+K12191+K05863+K12193+K11251+K11251+K04079
ko04380	Osteoclast differentiation	P01584 P15407	2	http://www.kegg.jp/kegg-bin/show_pathway?ko04380+K04519+K04502
ko04620	Toll-like receptor signaling pathway	P01584 Q9H0E2 P46734	3	http://www.kegg.jp/kegg-bin/show_pathway?ko04620+K04519+K05402+K04432
ko04621	NOD-like receptor signaling pathway	P01584 P07858 Q14116 P49662 Q92844 O95166 P32456 P57764 Q15147 Q58FF6	10	http://www.kegg.jp/kegg-bin/show_pathway?ko04621+K04519+K01363+K05482+K04394+K12650+K08341+K20897+K20917+K05858+K04079
ko04623	Cytosolic DNA-sensing pathway	P01584 Q14116 O95786 P61218	4	http://www.kegg.jp/kegg-bin/show_pathway?ko04623+K04519+K05482+K12646+K03014
ko04625	C-type lectin receptor signaling pathway	P01584 P04049	2	http://www.kegg.jp/kegg-bin/show_pathway?ko04625+K04519+K04366
ko04657	IL-17 signaling pathway	P01584 P15407 Q58FF6	3	http://www.kegg.jp/kegg-bin/show_pathway?ko04657+K04519+K04502+K04079
ko04659	Th17 cell differentiation	P01584 P42345 P84022 Q58FF6	4	http://www.kegg.jp/kegg-bin/show_pathway?ko04659+K04519+K07203+K23605+K04079
ko04668	TNF signaling pathway	P01584 P05362 P46734	3	http://www.kegg.jp/kegg-bin/show_pathway?ko04668+K04519+K06490+K04432
ko04750	Inflammatory mediator regulation of TRP channels	P01584 P22694 P55085 P46734 Q15147	5	http://www.kegg.jp/kegg-bin/show_pathway?ko04750+K04519+K04345+K04234+K04432+K05858
ko04932	Non-alcoholic fatty liver disease (NAFLD)	P01584 O00483	2	http://www.kegg.jp/kegg-bin/show_pathway?ko04932+K04519+K03948
ko04940	Type I diabetes mellitus	P01584 P10321 P04439 P13747 P01889	5	http://www.kegg.jp/kegg-bin/show_pathway?ko04940+K04519+K06751+K06751+K06751+K06751
ko05020	Prion diseases	P01584 P22694	2	http://www.kegg.jp/kegg-bin/show_pathway?ko05020+K04519+K04345
ko05131	Shigellosis	P01584 Q14116 Q2TB90 P49662 O95166 Q92599 P42345 P08648 Q13185 Q71DI3 P00533 P68431 Q15147	13	http://www.kegg.jp/kegg-bin/show_pathway?ko05131+K04519+K05482+K00844+K04394+K08341+K16939+K07203+K06484+K11586+K11253+K04361+K11253+K05858
ko05132	Salmonella infection	P01584 Q14116 P49662 P20339 Q96RF0 Q9BQS8 Q16611 P04049 P46734 P55160 P57764 Q8WUW1 Q58FF6	13	http://www.kegg.jp/kegg-bin/show_pathway?ko05132+K04519+K05482+K04394+K07887+K17923+K21954+K14021+K04366+K04432+K05750+K20917+K05752+K04079
ko05133	Pertussis	P01584 Q9Y281 P08648	3	http://www.kegg.jp/kegg-bin/show_pathway?ko05133+K04519+K05765+K06484
ko05134	Legionellosis	P01584 Q14116 P49759	3	http://www.kegg.jp/kegg-bin/show_pathway?ko05134+K04519+K05482+K23561
ko05140	Leishmaniasis	P01584	1	http://www.kegg.jp/kegg-bin/show_pathway?ko05140+K04519
ko05143	African trypanosomiasis	P01584 Q14116 P05362 P55085 Q15147	5	http://www.kegg.jp/kegg-bin/show_pathway?ko05143+K04519+K05482+K06490+K04234+K05858
ko05144	Malaria	P01584 Q07954 Q14116 P05362	4	http://www.kegg.jp/kegg-bin/show_pathway?ko05144+K04519+K04550+K05482+K06490
ko05152	Tuberculosis	P01584 Q14116 P20339 P04049	4	http://www.kegg.jp/kegg-bin/show_pathway?ko05152+K04519+K05482+K07887+K04366
ko05162	Measles	P01584 Q16611 Q96PM5 O95786	4	http://www.kegg.jp/kegg-bin/show_pathway?ko05162+K04519+K14021+K10144+K12646
ko05163	Human cytomegalovirus infection	P01584 Q03518 P10321 P04439 P63218 P22694 P13747 P61769 Q16611 P42345 Q03519 P01889 P04049 P00533 Q15147	15	http://www.kegg.jp/kegg-bin/show_pathway?ko05163+K04519+K05653+K06751+K06751+K04542+K04345+K06751+K08055+K14021+K07203+K05654+K06751+K04366+K04361+K05858
ko05164	Influenza A	P01584 Q14116 P05362 Q16611 O95786 P04049 P12235 P07477	8	http://www.kegg.jp/kegg-bin/show_pathway?ko05164+K04519+K05482+K06490+K14021+K12646+K04366+K05863+K01312
ko05168	Herpes simplex virus 1 infection	P01584 Q03518 P10321 P04439 P13747 P61769 Q16611 P42345 Q03519 O95786 P08648 P01889	12	http://www.kegg.jp/kegg-bin/show_pathway?ko05168+K04519+K05653+K06751+K06751+K06751+K08055+K14021+K07203+K05654+K12646+K06484+K06751
ko05321	Inflammatory bowel disease (IBD)	P01584 Q14116 P84022	3	http://www.kegg.jp/kegg-bin/show_pathway?ko05321+K04519+K05482+K23605
ko05323	Rheumatoid arthritis	P01584 Q14116 P05362	3	http://www.kegg.jp/kegg-bin/show_pathway?ko05323+K04519+K05482+K06490
ko05332	Graft-versus-host disease	P01584 P10321 P04439 P13747 P01889	5	http://www.kegg.jp/kegg-bin/show_pathway?ko05332+K04519+K06751+K06751+K06751+K06751
ko05418	Fluid shear stress and atherosclerosis	P01584 P05362 P09601 P28562 Q58FF6	5	http://www.kegg.jp/kegg-bin/show_pathway?ko05418+K04519+K06490+K00510+K21278+K04079
ko00230	Purine metabolism	P23921 Q01432 P21589 P11908 P15531	5	http://www.kegg.jp/kegg-bin/show_pathway?ko00230+K10807+K01490+K19970+K00948+K00940
ko00240	Pyrimidine metabolism	P23921 P21589 P33316 P15531 P04818	5	http://www.kegg.jp/kegg-bin/show_pathway?ko00240+K10807+K19970+K01520+K00940+K00560
ko00480	Glutathione metabolism	P23921 Q8TED1 P07203	3	http://www.kegg.jp/kegg-bin/show_pathway?ko00480+K10807+K00432+K00432
ko00983	Drug metabolism - other enzymes	P23921 P33316 P15531	3	http://www.kegg.jp/kegg-bin/show_pathway?ko00983+K10807+K01520+K00940
ko02010	ABC transporters	P28288 P08183 Q03518 Q03519 O14678	5	http://www.kegg.jp/kegg-bin/show_pathway?ko02010+K05677+K05658+K05653+K05654+K05678
ko04140	Autophagy - animal	P07858 Q92844 P22694 O95166 P42345 P04049	6	http://www.kegg.jp/kegg-bin/show_pathway?ko04140+K01363+K12650+K04345+K08341+K07203+K04366
ko04142	Lysosome	P07858 O75503 P54803 Q9UBR2 P10619 P61916 Q99523	7	http://www.kegg.jp/kegg-bin/show_pathway?ko04142+K01363+K12390+K01202+K08568+K13289+K13443+K12388
ko04210	Apoptosis	P07858 Q9UBR2 Q16611 Q71U36 P04049 A6NHL2	6	http://www.kegg.jp/kegg-bin/show_pathway?ko04210+K01363+K08568+K14021+K07374+K04366+K07374
ko04612	Antigen processing and presentation	P07858 Q03518 P10321 P04439 P13747 P61769 Q03519 P01889 Q58FF6	9	http://www.kegg.jp/kegg-bin/show_pathway?ko04612+K01363+K05653+K06751+K06751+K06751+K08055+K05654+K06751+K04079
ko04924	Renin secretion	P07858 P22694 Q15147	3	http://www.kegg.jp/kegg-bin/show_pathway?ko04924+K01363+K04345+K05858
ko04979	Cholesterol metabolism	Q07954 P61916 Q99523	3	http://www.kegg.jp/kegg-bin/show_pathway?ko04979+K04550+K13443+K12388
ko04061	Viral protein interaction with cytokine and cytokine receptor	Q14116	1	http://www.kegg.jp/kegg-bin/show_pathway?ko04061+K05482
ko00500	Starch and sucrose metabolism	Q6PCE3 Q2TB90	2	http://www.kegg.jp/kegg-bin/show_pathway?ko00500+K11809+K00844
ko04361	Axon regeneration	Q9UKV8 P22694 P42345 Q15147	4	http://www.kegg.jp/kegg-bin/show_pathway?ko04361+K11593+K04345+K07203+K05858
ko04630	JAK-STAT signaling pathway	P15509 P42345 P04049 P00533	4	http://www.kegg.jp/kegg-bin/show_pathway?ko04630+K05066+K07203+K04366+K04361
ko00010	Glycolysis / Gluconeogenesis	Q2TB90 P09104 P09467	3	http://www.kegg.jp/kegg-bin/show_pathway?ko00010+K00844+K01689+K03841
ko00051	Fructose and mannose metabolism	Q2TB90 P09467	2	http://www.kegg.jp/kegg-bin/show_pathway?ko00051+K00844+K03841
ko00052	Galactose metabolism	Q2TB90	1	http://www.kegg.jp/kegg-bin/show_pathway?ko00052+K00844
ko00520	Amino sugar and nucleotide sugar metabolism	Q2TB90 O94808	2	http://www.kegg.jp/kegg-bin/show_pathway?ko00520+K00844+K00820
ko00521	Streptomycin biosynthesis	Q2TB90	1	http://www.kegg.jp/kegg-bin/show_pathway?ko00521+K00844
ko00524	Neomycin, kanamycin and gentamicin biosynthesis	Q2TB90	1	http://www.kegg.jp/kegg-bin/show_pathway?ko00524+K00844
ko01120	Microbial metabolism in diverse environments	Q2TB90 P09104 P09467 P07311 Q9Y617 P16219 P11908 Q96DG6	8	http://www.kegg.jp/kegg-bin/show_pathway?ko01120+K00844+K01689+K03841+K01512+K00831+K00248+K00948+K01061
ko01200	Carbon metabolism	Q2TB90 P09104 O95479 P09467 Q15067 Q9Y617 P16219 P11908	8	http://www.kegg.jp/kegg-bin/show_pathway?ko01200+K00844+K01689+K13937+K03841+K00232+K00831+K00248+K00948
ko04910	Insulin signaling pathway	Q2TB90 P22694 P09467 P42345 P04049	5	http://www.kegg.jp/kegg-bin/show_pathway?ko04910+K00844+K04345+K03841+K07203+K04366
ko04930	Type II diabetes mellitus	Q2TB90 P42345	2	http://www.kegg.jp/kegg-bin/show_pathway?ko04930+K00844+K07203
ko04973	Carbohydrate digestion and absorption	Q2TB90 Q15147	2	http://www.kegg.jp/kegg-bin/show_pathway?ko04973+K00844+K05858
ko05230	Central carbon metabolism in cancer	Q2TB90 P42345 P04049 Q15758 P00533	5	http://www.kegg.jp/kegg-bin/show_pathway?ko05230+K00844+K07203+K04366+K05616+K04361
ko05215	Prostate cancer	P00749 P42345 O43278 P04049 P00533 Q58FF6	6	http://www.kegg.jp/kegg-bin/show_pathway?ko05215+K01348+K07203+K15619+K04366+K04361+K04079
ko04974	Protein digestion and absorption	P20908 P27487 Q15758 P07477	4	http://www.kegg.jp/kegg-bin/show_pathway?ko04974+K19721+K01278+K05616+K01312
ko05145	Toxoplasmosis	Q13751 P07942 Q13753 P46734	4	http://www.kegg.jp/kegg-bin/show_pathway?ko05145+K06244+K05636+K06246+K04432
ko04650	Natural killer cell mediated cytotoxicity	P05362 Q9BZM5 P04049 Q9BZM4	4	http://www.kegg.jp/kegg-bin/show_pathway?ko04650+K06490+K07986+K04366+K07986
ko05166	Human T-cell leukemia virus 1 infection	P05362 P10321 P04439 P22694 P13747 P61769 P01889 P20248 P84022 P12235 P15407	11	http://www.kegg.jp/kegg-bin/show_pathway?ko05166+K06490+K06751+K06751+K04345+K06751+K08055+K06751+K06627+K23605+K05863+K04502
ko05167	Kaposi sarcoma-associated herpesvirus infection	P05362 P10321 P04439 P63218 O95166 P13747 Q16611 P42345 P01889 P04049	10	http://www.kegg.jp/kegg-bin/show_pathway?ko05167+K06490+K06751+K06751+K04542+K08341+K06751+K14021+K07203+K06751+K04366
ko05169	Epstein-Barr virus infection	P05362 Q03518 P10321 P04439 P46934 P13747 P61769 Q16611 Q03519 O95786 P01889 P20248 P46734	13	http://www.kegg.jp/kegg-bin/show_pathway?ko05169+K06490+K05653+K06751+K06751+K10591+K06751+K08055+K14021+K05654+K12646+K06751+K06627+K04432
ko05416	Viral myocarditis	P05362 P10321 P04439 P13747 P01889	5	http://www.kegg.jp/kegg-bin/show_pathway?ko05416+K06490+K06751+K06751+K06751+K06751
ko04976	Bile secretion	P08183 P22694 P00918	3	http://www.kegg.jp/kegg-bin/show_pathway?ko04976+K05658+K04345+K18245
ko05226	Gastric cancer	P08183 Q16611 P42345 P04049 P84022 P00533	6	http://www.kegg.jp/kegg-bin/show_pathway?ko05226+K05658+K14021+K07203+K04366+K23605+K04361
ko04120	Ubiquitin mediated proteolysis	O14933 P46934 Q96PM5 Q9UK22 P49459 P63146	6	http://www.kegg.jp/kegg-bin/show_pathway?ko04120+K04553+K10591+K10144+K10099+K10573+K10574
ko05012	Parkinson disease	O14933 P22694 P12235 O00483	4	http://www.kegg.jp/kegg-bin/show_pathway?ko05012+K04553+K04345+K05863+K03948
ko00680	Methane metabolism	P09104 P09467 Q9Y617	3	http://www.kegg.jp/kegg-bin/show_pathway?ko00680+K01689+K03841+K00831
ko01230	Biosynthesis of amino acids	P09104 Q9Y617 Q96C36 P11908 P78540	5	http://www.kegg.jp/kegg-bin/show_pathway?ko01230+K01689+K00831+K00286+K00948+K01476
ko03018	RNA degradation	P09104 Q9UIV1 O15116	3	http://www.kegg.jp/kegg-bin/show_pathway?ko03018+K01689+K12581+K12620
ko04144	Endocytosis	P20339 P10321 Q9UQN3 P04439 P46934 Q9Y6D6 P13747 P01889 Q9NP61 P84022 Q9ULH1 O43633 Q9Y3E7 P00533	14	http://www.kegg.jp/kegg-bin/show_pathway?ko04144+K07887+K06751+K12192+K06751+K10591+K18442+K06751+K06751+K12493+K23605+K12488+K12191+K12193+K04361
ko05014	Amyotrophic lateral sclerosis (ALS)	P20339 Q8TED1 P07203 P46734	4	http://www.kegg.jp/kegg-bin/show_pathway?ko05014+K07887+K00432+K00432+K04432
ko04020	Calcium signaling pathway	P23634 P22694 P12235 P00533 Q15147	5	http://www.kegg.jp/kegg-bin/show_pathway?ko04020+K05850+K04345+K05863+K04361+K05858
ko04022	cGMP-PKG signaling pathway	P23634 P04049 P12235 Q15147	4	http://www.kegg.jp/kegg-bin/show_pathway?ko04022+K05850+K04366+K05863+K05858
ko04024	cAMP signaling pathway	P23634 P22694 Q15067 P04049	4	http://www.kegg.jp/kegg-bin/show_pathway?ko04024+K05850+K04345+K00232+K04366
ko04925	Aldosterone synthesis and secretion	P23634 P22694 Q15147	3	http://www.kegg.jp/kegg-bin/show_pathway?ko04925+K05850+K04345+K05858
ko04961	Endocrine and other factor-regulated calcium reabsorption	P23634 P22694 Q15147	3	http://www.kegg.jp/kegg-bin/show_pathway?ko04961+K05850+K04345+K05858
ko04970	Salivary secretion	P23634 P22694 Q15147	3	http://www.kegg.jp/kegg-bin/show_pathway?ko04970+K05850+K04345+K05858
ko04972	Pancreatic secretion	P23634 O95716 P07477 P00918 Q15147	5	http://www.kegg.jp/kegg-bin/show_pathway?ko04972+K05850+K07884+K01312+K18245+K05858
ko03060	Protein export	P61009 Q9Y6A9 Q15005	3	http://www.kegg.jp/kegg-bin/show_pathway?ko03060+K12948+K12946+K12947
ko00310	Lysine degradation	O00469	1	http://www.kegg.jp/kegg-bin/show_pathway?ko00310+K13645
ko05170	Human immunodeficiency virus 1 infection	Q03518 P10321 P04439 P63218 Q9Y281 P13747 P61769 Q16611 P42345 Q03519 P01889 P04049 P46734 P14635	14	http://www.kegg.jp/kegg-bin/show_pathway?ko05170+K05653+K06751+K06751+K04542+K05765+K06751+K08055+K14021+K07203+K05654+K06751+K04366+K04432+K05868
ko05340	Primary immunodeficiency	Q03518 Q03519	2	http://www.kegg.jp/kegg-bin/show_pathway?ko05340+K05653+K05654
ko00760	Nicotinate and nicotinamide metabolism	P21589	1	http://www.kegg.jp/kegg-bin/show_pathway?ko00760+K19970
ko04622	RIG-I-like receptor signaling pathway	Q92844 O95786 Q13526	3	http://www.kegg.jp/kegg-bin/show_pathway?ko04622+K12650+K12646+K09578
ko04011	MAPK signaling pathway - yeast	P21695 P46934 P28347	3	http://www.kegg.jp/kegg-bin/show_pathway?ko04011+K00006+K10591+K09448
ko05203	Viral carcinogenesis	P10321 P04439 P22694 P13747 Q16611 P01889 P20248 Q99880 P62805 Q6DN03	10	http://www.kegg.jp/kegg-bin/show_pathway?ko05203+K06751+K06751+K04345+K06751+K14021+K06751+K06627+K11252+K11254+K11252
ko05320	Autoimmune thyroid disease	P10321 P04439 P13747 P01889	4	http://www.kegg.jp/kegg-bin/show_pathway?ko05320+K06751+K06751+K06751+K06751
ko05330	Allograft rejection	P10321 P04439 P13747 P01889	4	http://www.kegg.jp/kegg-bin/show_pathway?ko05330+K06751+K06751+K06751+K06751
ko00790	Folate biosynthesis	Q92820	1	http://www.kegg.jp/kegg-bin/show_pathway?ko00790+K01307
ko00590	Arachidonic acid metabolism	Q8TED1 P07203	2	http://www.kegg.jp/kegg-bin/show_pathway?ko00590+K00432+K00432
ko04918	Thyroid hormone synthesis	Q8TED1 P22694 P07203 Q15147	4	http://www.kegg.jp/kegg-bin/show_pathway?ko04918+K00432+K04345+K00432+K05858
ko04062	Chemokine signaling pathway	P63218 P22694 P04049 Q15147	4	http://www.kegg.jp/kegg-bin/show_pathway?ko04062+K04542+K04345+K04366+K05858
ko04713	Circadian entrainment	P63218 P22694 Q15147	3	http://www.kegg.jp/kegg-bin/show_pathway?ko04713+K04542+K04345+K05858
ko04723	Retrograde endocannabinoid signaling	P63218 P22694 O00483 Q15147	4	http://www.kegg.jp/kegg-bin/show_pathway?ko04723+K04542+K04345+K03948+K05858
ko04724	Glutamatergic synapse	P63218 P22694 Q15147	3	http://www.kegg.jp/kegg-bin/show_pathway?ko04724+K04542+K04345+K05858
ko04725	Cholinergic synapse	P63218 P22694 Q15147	3	http://www.kegg.jp/kegg-bin/show_pathway?ko04725+K04542+K04345+K05858
ko04726	Serotonergic synapse	P63218 P22694 P04049 P28562 Q15147	5	http://www.kegg.jp/kegg-bin/show_pathway?ko04726+K04542+K04345+K04366+K21278+K05858
ko04727	GABAergic synapse	P63218 P22694 O95166	3	http://www.kegg.jp/kegg-bin/show_pathway?ko04727+K04542+K04345+K08341
ko04728	Dopaminergic synapse	P63218 P22694 Q15147	3	http://www.kegg.jp/kegg-bin/show_pathway?ko04728+K04542+K04345+K05858
ko04926	Relaxin signaling pathway	P63218 P22694 P04049 P00533 Q15147	5	http://www.kegg.jp/kegg-bin/show_pathway?ko04926+K04542+K04345+K04366+K04361+K05858
ko05032	Morphine addiction	P63218 P22694	2	http://www.kegg.jp/kegg-bin/show_pathway?ko05032+K04542+K04345
ko05034	Alcoholism	P63218 P22694 P04049 Q99880 P62805 Q71DI3 Q6DN03 P68431 Q8IUE6 Q6FI13	10	http://www.kegg.jp/kegg-bin/show_pathway?ko05034+K04542+K04345+K04366+K11252+K11254+K11253+K11252+K11253+K11251+K11251
ko01522	Endocrine resistance	P22694 P42345 P04049 P00533	4	http://www.kegg.jp/kegg-bin/show_pathway?ko01522+K04345+K07203+K04366+K04361
ko04113	Meiosis - yeast	P22694 P42345	2	http://www.kegg.jp/kegg-bin/show_pathway?ko04113+K04345+K07203
ko04114	Oocyte meiosis	P22694 P14635 P53350	3	http://www.kegg.jp/kegg-bin/show_pathway?ko04114+K04345+K05868+K06631
ko04138	Autophagy - yeast	P22694 O95166 P42345	3	http://www.kegg.jp/kegg-bin/show_pathway?ko04138+K04345+K08341+K07203
ko04270	Vascular smooth muscle contraction	P22694 P04049 Q15147	3	http://www.kegg.jp/kegg-bin/show_pathway?ko04270+K04345+K04366+K05858
ko04310	Wnt signaling pathway	P22694 P84022 Q01973 P15407 Q15147	5	http://www.kegg.jp/kegg-bin/show_pathway?ko04310+K04345+K23605+K05122+K04502+K05858
ko04340	Hedgehog signaling pathway	P22694	1	http://www.kegg.jp/kegg-bin/show_pathway?ko04340+K04345
ko04341	Hedgehog signaling pathway - fly	P22694	1	http://www.kegg.jp/kegg-bin/show_pathway?ko04341+K04345
ko04720	Long-term potentiation	P22694 P04049 Q15147	3	http://www.kegg.jp/kegg-bin/show_pathway?ko04720+K04345+K04366+K05858
ko04740	Olfactory transduction	P22694	1	http://www.kegg.jp/kegg-bin/show_pathway?ko04740+K04345
ko04742	Taste transduction	P22694	1	http://www.kegg.jp/kegg-bin/show_pathway?ko04742+K04345
ko04911	Insulin secretion	P22694 Q15147	2	http://www.kegg.jp/kegg-bin/show_pathway?ko04911+K04345+K05858
ko04912	GnRH signaling pathway	P22694 P04049 P46734 P00533 Q15147	5	http://www.kegg.jp/kegg-bin/show_pathway?ko04912+K04345+K04366+K04432+K04361+K05858
ko04913	Ovarian steroidogenesis	P22694	1	http://www.kegg.jp/kegg-bin/show_pathway?ko04913+K04345
ko04914	Progesterone-mediated oocyte maturation	P22694 P04049 P20248 Q14807 P14635 P53350 Q58FF6	7	http://www.kegg.jp/kegg-bin/show_pathway?ko04914+K04345+K04366+K06627+K10403+K05868+K06631+K04079
ko04915	Estrogen signaling pathway	P22694 P04049 P00533 Q15147 Q58FF6	5	http://www.kegg.jp/kegg-bin/show_pathway?ko04915+K04345+K04366+K04361+K05858+K04079
ko04916	Melanogenesis	P22694 P04049 Q15147	3	http://www.kegg.jp/kegg-bin/show_pathway?ko04916+K04345+K04366+K05858
ko04919	Thyroid hormone signaling pathway	P22694 P42345 P04049 Q15147	4	http://www.kegg.jp/kegg-bin/show_pathway?ko04919+K04345+K07203+K04366+K05858
ko04922	Glucagon signaling pathway	P22694 P09467 Q15147	3	http://www.kegg.jp/kegg-bin/show_pathway?ko04922+K04345+K03841+K05858
ko04923	Regulation of lipolysis in adipocytes	P22694	1	http://www.kegg.jp/kegg-bin/show_pathway?ko04923+K04345
ko04927	Cortisol synthesis and secretion	P22694 Q15147	2	http://www.kegg.jp/kegg-bin/show_pathway?ko04927+K04345+K05858
ko04928	Parathyroid hormone synthesis, secretion and action	P22694 P04049 P00533 Q15147	4	http://www.kegg.jp/kegg-bin/show_pathway?ko04928+K04345+K04366+K04361+K05858
ko04934	Cushing syndrome	P22694 P00533 Q15147	3	http://www.kegg.jp/kegg-bin/show_pathway?ko04934+K04345+K04361+K05858
ko04935	Growth hormone synthesis, secretion and action	P22694 P42345 P04049 P46734 Q15147	5	http://www.kegg.jp/kegg-bin/show_pathway?ko04935+K04345+K07203+K04366+K04432+K05858
ko04971	Gastric acid secretion	P22694 P00918 Q15147	3	http://www.kegg.jp/kegg-bin/show_pathway?ko04971+K04345+K18245+K05858
ko05030	Cocaine addiction	P22694	1	http://www.kegg.jp/kegg-bin/show_pathway?ko05030+K04345
ko05031	Amphetamine addiction	P22694	1	http://www.kegg.jp/kegg-bin/show_pathway?ko05031+K04345
ko05120	Epithelial cell signaling in Helicobacter pylori infection	Q9Y624 P00533	2	http://www.kegg.jp/kegg-bin/show_pathway?ko05120+K06089+K04361
ko00514	Other types of O-glycan biosynthesis	Q9Y2G5 Q5NDL2 Q6P9A2	3	http://www.kegg.jp/kegg-bin/show_pathway?ko00514+K03691+K18134+K00710
ko04136	Autophagy - other	O95166 P42345	2	http://www.kegg.jp/kegg-bin/show_pathway?ko04136+K08341+K07203
ko04137	Mitophagy - animal	O95166	1	http://www.kegg.jp/kegg-bin/show_pathway?ko04137+K08341
ko04139	Mitophagy - yeast	O95166 P42345	2	http://www.kegg.jp/kegg-bin/show_pathway?ko04139+K08341+K07203
ko04614	Renin-angiotensin system	P10619	1	http://www.kegg.jp/kegg-bin/show_pathway?ko04614+K13289
ko00250	Alanine, aspartate and glutamate metabolism	O94808	1	http://www.kegg.jp/kegg-bin/show_pathway?ko00250+K00820
ko04931	Insulin resistance	O94808 P42345	2	http://www.kegg.jp/kegg-bin/show_pathway?ko04931+K00820+K07203
ko04110	Cell cycle	P31947 P20248 P84022 P14635 P53350	5	http://www.kegg.jp/kegg-bin/show_pathway?ko04110+K06644+K06627+K23605+K05868+K06631
ko04960	Aldosterone-regulated sodium reabsorption	P31947	1	http://www.kegg.jp/kegg-bin/show_pathway?ko04960+K06644
ko04080	Neuroactive ligand-receptor interaction	P55085 P07477	2	http://www.kegg.jp/kegg-bin/show_pathway?ko04080+K04234+K01312
ko01524	Platinum drug resistance	Q16611 P43246	2	http://www.kegg.jp/kegg-bin/show_pathway?ko01524+K14021+K08735
ko04215	Apoptosis - multiple species	Q16611	1	http://www.kegg.jp/kegg-bin/show_pathway?ko04215+K14021
ko05213	Endometrial cancer	Q16611 P04049 P00533	3	http://www.kegg.jp/kegg-bin/show_pathway?ko05213+K14021+K04366+K04361
ko05214	Glioma	Q16611 P42345 P04049 P00533	4	http://www.kegg.jp/kegg-bin/show_pathway?ko05214+K14021+K07203+K04366+K04361
ko05216	Thyroid cancer	Q16611	1	http://www.kegg.jp/kegg-bin/show_pathway?ko05216+K14021
ko05217	Basal cell carcinoma	Q16611	1	http://www.kegg.jp/kegg-bin/show_pathway?ko05217+K14021
ko05218	Melanoma	Q16611 P04049 P00533	3	http://www.kegg.jp/kegg-bin/show_pathway?ko05218+K14021+K04366+K04361
ko05220	Chronic myeloid leukemia	Q16611 P04049 P84022	3	http://www.kegg.jp/kegg-bin/show_pathway?ko05220+K14021+K04366+K23605
ko05223	Non-small cell lung cancer	Q16611 P04049 P00533	3	http://www.kegg.jp/kegg-bin/show_pathway?ko05223+K14021+K04366+K04361
ko05224	Breast cancer	Q16611 P42345 P04049 P00533	4	http://www.kegg.jp/kegg-bin/show_pathway?ko05224+K14021+K07203+K04366+K04361
ko05225	Hepatocellular carcinoma	Q16611 P42345 P04049 P09601 P84022 P00533	6	http://www.kegg.jp/kegg-bin/show_pathway?ko05225+K14021+K07203+K04366+K00510+K23605+K04361
ko00860	Porphyrin and chlorophyll metabolism	P53701 P09601	2	http://www.kegg.jp/kegg-bin/show_pathway?ko00860+K01764+K00510
ko00030	Pentose phosphate pathway	O95479 P09467 P11908	3	http://www.kegg.jp/kegg-bin/show_pathway?ko00030+K13937+K03841+K00948
ko00710	Carbon fixation in photosynthetic organisms	P09467	1	http://www.kegg.jp/kegg-bin/show_pathway?ko00710+K03841
ko04152	AMPK signaling pathway	P09467 P42345 P20248 O00767	4	http://www.kegg.jp/kegg-bin/show_pathway?ko04152+K03841+K07203+K06627+K00507
ko00071	Fatty acid degradation	Q15067 P49748 P16219	3	http://www.kegg.jp/kegg-bin/show_pathway?ko00071+K00232+K09479+K00248
ko00410	beta-Alanine metabolism	Q15067 P16219	2	http://www.kegg.jp/kegg-bin/show_pathway?ko00410+K00232+K00248
ko00592	alpha-Linolenic acid metabolism	Q15067	1	http://www.kegg.jp/kegg-bin/show_pathway?ko00592+K00232
ko00640	Propanoate metabolism	Q15067 P16219	2	http://www.kegg.jp/kegg-bin/show_pathway?ko00640+K00232+K00248
ko01040	Biosynthesis of unsaturated fatty acids	Q15067 O00767	2	http://www.kegg.jp/kegg-bin/show_pathway?ko01040+K00232+K00507
ko01212	Fatty acid metabolism	Q15067 P49748 P16219 O00767	4	http://www.kegg.jp/kegg-bin/show_pathway?ko01212+K00232+K09479+K00248+K00507
ko03320	PPAR signaling pathway	Q15067 O00767	2	http://www.kegg.jp/kegg-bin/show_pathway?ko03320+K00232+K00507
ko04150	mTOR signaling pathway	P30622 P42345 P04049	3	http://www.kegg.jp/kegg-bin/show_pathway?ko04150+K10421+K07203+K04366
ko04012	ErbB signaling pathway	P42345 P15514 P04049 P00533	4	http://www.kegg.jp/kegg-bin/show_pathway?ko04012+K07203+K09782+K04366+K04361
ko04920	Adipocytokine signaling pathway	P42345	1	http://www.kegg.jp/kegg-bin/show_pathway?ko04920+K07203
ko05017	Spinocerebellar ataxia	P42345 Q15147	2	http://www.kegg.jp/kegg-bin/show_pathway?ko05017+K07203+K05858
ko05221	Acute myeloid leukemia	P42345 P04049 P20248	3	http://www.kegg.jp/kegg-bin/show_pathway?ko05221+K07203+K04366+K06627
ko05235	PD-L1 expression and PD-1 checkpoint pathway in cancer	P42345 P04049 P46734 P00533	4	http://www.kegg.jp/kegg-bin/show_pathway?ko05235+K07203+K04366+K04432+K04361
ko04130	SNARE interactions in vesicular transport	Q12846 Q9NYM9	2	http://www.kegg.jp/kegg-bin/show_pathway?ko04130+K13502+K08504
ko05161	Hepatitis B	O95786 P04049 P20248 P46734 P84022	5	http://www.kegg.jp/kegg-bin/show_pathway?ko05161+K12646+K04366+K06627+K04432+K23605
ko04624	Toll and Imd signaling pathway	Q01484 P46734	2	http://www.kegg.jp/kegg-bin/show_pathway?ko04624+K10380+K04432
ko00620	Pyruvate metabolism	P07311	1	http://www.kegg.jp/kegg-bin/show_pathway?ko00620+K01512
ko00627	Aminobenzoate degradation	P07311	1	http://www.kegg.jp/kegg-bin/show_pathway?ko00627+K01512
ko03013	RNA transport	Q9BRP8	1	http://www.kegg.jp/kegg-bin/show_pathway?ko03013+K14294
ko03015	mRNA surveillance pathway	Q9BRP8	1	http://www.kegg.jp/kegg-bin/show_pathway?ko03015+K14294
ko00740	Riboflavin metabolism	Q8NFF5	1	http://www.kegg.jp/kegg-bin/show_pathway?ko00740+K00953
ko03050	Proteasome	P28062 Q9Y244	2	http://www.kegg.jp/kegg-bin/show_pathway?ko03050+K02740+K11599
ko00260	Glycine, serine and threonine metabolism	Q9Y617	1	http://www.kegg.jp/kegg-bin/show_pathway?ko00260+K00831
ko00270	Cysteine and methionine metabolism	Q9Y617 P26358 Q9BV57	3	http://www.kegg.jp/kegg-bin/show_pathway?ko00270+K00831+K00558+K08967
ko00750	Vitamin B6 metabolism	Q9Y617	1	http://www.kegg.jp/kegg-bin/show_pathway?ko00750+K00831
ko04071	Sphingolipid signaling pathway	P04049 Q15147	2	http://www.kegg.jp/kegg-bin/show_pathway?ko04071+K04366+K05858
ko04370	VEGF signaling pathway	P04049	1	http://www.kegg.jp/kegg-bin/show_pathway?ko04370+K04366
ko04550	Signaling pathways regulating pluripotency of stem cells	P04049 P84022 Q99717	3	http://www.kegg.jp/kegg-bin/show_pathway?ko04550+K04366+K23605+K16790
ko04660	T cell receptor signaling pathway	P04049	1	http://www.kegg.jp/kegg-bin/show_pathway?ko04660+K04366
ko04662	B cell receptor signaling pathway	P04049	1	http://www.kegg.jp/kegg-bin/show_pathway?ko04662+K04366
ko04664	Fc epsilon RI signaling pathway	P04049 P46734	2	http://www.kegg.jp/kegg-bin/show_pathway?ko04664+K04366+K04432
ko04730	Long-term depression	P04049 Q15147	2	http://www.kegg.jp/kegg-bin/show_pathway?ko04730+K04366+K05858
ko04917	Prolactin signaling pathway	P04049	1	http://www.kegg.jp/kegg-bin/show_pathway?ko04917+K04366
ko04929	GnRH secretion	P04049 Q15147	2	http://www.kegg.jp/kegg-bin/show_pathway?ko04929+K04366+K05858
ko05211	Renal cell carcinoma	P04049	1	http://www.kegg.jp/kegg-bin/show_pathway?ko05211+K04366
ko05219	Bladder cancer	P04049 P00533	2	http://www.kegg.jp/kegg-bin/show_pathway?ko05219+K04366+K04361
ko03430	Mismatch repair	P43246	1	http://www.kegg.jp/kegg-bin/show_pathway?ko03430+K08735
ko04122	Sulfur relay system	Q7Z7A3	1	http://www.kegg.jp/kegg-bin/show_pathway?ko04122+K14168
ko00330	Arginine and proline metabolism	Q96C36 P78540	2	http://www.kegg.jp/kegg-bin/show_pathway?ko00330+K00286+K01476
ko04216	Ferroptosis	P09601 Q658P3	2	http://www.kegg.jp/kegg-bin/show_pathway?ko04216+K00510+K10142
ko00280	Valine, leucine and isoleucine degradation	P16219	1	http://www.kegg.jp/kegg-bin/show_pathway?ko00280+K00248
ko00650	Butanoate metabolism	P16219	1	http://www.kegg.jp/kegg-bin/show_pathway?ko00650+K00248
ko03030	DNA replication	P49643	1	http://www.kegg.jp/kegg-bin/show_pathway?ko03030+K02685
ko04391	Hippo signaling pathway - fly	Q15334 P28347	2	http://www.kegg.jp/kegg-bin/show_pathway?ko04391+K06094+K09448
ko04350	TGF-beta signaling pathway	P84022 Q99717	2	http://www.kegg.jp/kegg-bin/show_pathway?ko04350+K23605+K16790
ko04520	Adherens junction	P84022 P00533	2	http://www.kegg.jp/kegg-bin/show_pathway?ko04520+K23605+K04361
ko03440	Homologous recombination	Q13472	1	http://www.kegg.jp/kegg-bin/show_pathway?ko03440+K03165
ko03460	Fanconi anemia pathway	Q13472	1	http://www.kegg.jp/kegg-bin/show_pathway?ko03460+K03165
ko00361	Chlorocyclohexane and chlorobenzene degradation	Q96DG6	1	http://www.kegg.jp/kegg-bin/show_pathway?ko00361+K01061
ko00364	Fluorobenzoate degradation	Q96DG6	1	http://www.kegg.jp/kegg-bin/show_pathway?ko00364+K01061
ko00623	Toluene degradation	Q96DG6	1	http://www.kegg.jp/kegg-bin/show_pathway?ko00623+K01061
ko00220	Arginine biosynthesis	P78540	1	http://www.kegg.jp/kegg-bin/show_pathway?ko00220+K01476
ko05322	Systemic lupus erythematosus	Q99880 P62805 Q71DI3 Q6DN03 P68431 Q8IUE6 Q6FI13	7	http://www.kegg.jp/kegg-bin/show_pathway?ko05322+K11252+K11254+K11253+K11252+K11253+K11251+K11251
ko00770	Pantothenate and CoA biosynthesis	Q13057	1	http://www.kegg.jp/kegg-bin/show_pathway?ko00770+K02318
ko03008	Ribosome biogenesis in eukaryotes	Q9BVP2 Q9BRS2 Q9NV31 Q9Y324	4	http://www.kegg.jp/kegg-bin/show_pathway?ko03008+K14538+K07178+K14560+K14566
ko03010	Ribosome	P05386	1	http://www.kegg.jp/kegg-bin/show_pathway?ko03010+K02942
ko03020	RNA polymerase	P61218	1	http://www.kegg.jp/kegg-bin/show_pathway?ko03020+K03014
ko00512	Mucin type O-glycan biosynthesis	Q6P9A2	1	http://www.kegg.jp/kegg-bin/show_pathway?ko00512+K00710
ko00140	Steroid hormone biosynthesis	Q6UWP2	1	http://www.kegg.jp/kegg-bin/show_pathway?ko00140+K22970
ko00130	Ubiquinone and other terpenoid-quinone biosynthesis	Q9Y2Z9	1	http://www.kegg.jp/kegg-bin/show_pathway?ko00130+K06126
ko04392	Hippo signaling pathway - multiple species	P28347	1	http://www.kegg.jp/kegg-bin/show_pathway?ko04392+K09448
ko04320	Dorso-ventral axis formation	P00533	1	http://www.kegg.jp/kegg-bin/show_pathway?ko04320+K04361
ko00910	Nitrogen metabolism	P00918	1	http://www.kegg.jp/kegg-bin/show_pathway?ko00910+K18245
ko04964	Proximal tubule bicarbonate reclamation	P00918	1	http://www.kegg.jp/kegg-bin/show_pathway?ko04964+K18245
ko04966	Collecting duct acid secretion	P00918	1	http://www.kegg.jp/kegg-bin/show_pathway?ko04966+K18245
ko04016	MAPK signaling pathway - plant	P15531	1	http://www.kegg.jp/kegg-bin/show_pathway?ko04016+K00940
ko00562	Inositol phosphate metabolism	Q15147	1	http://www.kegg.jp/kegg-bin/show_pathway?ko00562+K05858
ko04070	Phosphatidylinositol signaling system	Q15147	1	http://www.kegg.jp/kegg-bin/show_pathway?ko04070+K05858
ko04745	Phototransduction - fly	Q15147	1	http://www.kegg.jp/kegg-bin/show_pathway?ko04745+K05858
ko00670	One carbon pool by folate	P04818	1	http://www.kegg.jp/kegg-bin/show_pathway?ko00670+K00560
ko04626	Plant-pathogen interaction	Q58FF6	1	http://www.kegg.jp/kegg-bin/show_pathway?ko04626+K04079

## Sheet: enrichment
Map ID	Map Name	#Diff	P_Value	FDR	Over/Under	DiffSeqs
ko05332	Graft-versus-host disease	5	5.01797e-06	0.00151543	Over	P01584 P10321 P04439 P13747 P01889
ko04940	Type I diabetes mellitus	5	1.66699e-05	0.00251715	Over	P01584 P10321 P04439 P13747 P01889
ko04514	Cell adhesion molecules (CAMs)	9	7.16518e-05	0.00540971	Over	O95832 P05362 P15151 P10321 P04439 Q9Y624 P13747 O95297 P01889
ko04612	Antigen processing and presentation	9	7.16518e-05	0.00540971	Over	P07858 Q03518 P10321 P04439 P13747 P61769 Q03519 P01889 Q58FF6
ko05320	Autoimmune thyroid disease	4	0.000195229	0.00982651	Over	P10321 P04439 P13747 P01889
ko05330	Allograft rejection	4	0.000195229	0.00982651	Over	P10321 P04439 P13747 P01889
ko02010	ABC transporters	5	0.000297879	0.0128514	Over	P28288 P08183 Q03518 Q03519 O14678
ko04640	Hematopoietic cell lineage	6	0.000370433	0.0139838	Over	P21926 P01584 P17301 P15509 P08648 P13987
ko05206	MicroRNAs in cancer	14	0.000434914	0.0145938	Over	P52926 P00749 P08183 P09493 Q16611 P42345 P08648 P04049 P09601 P26358 P24821 P35625 P00533 Q96FF9
ko04512	ECM-receptor interaction	8	0.000560457	0.0169258	Over	P02751 P17301 Q13751 P07942 Q08722 P08648 Q13753 P24821
ko05143	African trypanosomiasis	5	0.00110533	0.0303462	Over	P01584 Q14116 P05362 P55085 Q15147
ko05146	Amoebiasis	9	0.00122981	0.0309502	Over	P02751 P01584 Q13751 P07942 P20339 P22694 Q13753 P78540 Q15147
ko05322	Systemic lupus erythematosus	7	0.00192203	0.0429912	Over	Q99880 P62805 Q71DI3 Q6DN03 P68431 Q8IUE6 Q6FI13
ko05034	Alcoholism	10	0.00199297	0.0429912	Over	P63218 P22694 P04049 Q99880 P62805 Q71DI3 Q6DN03 P68431 Q8IUE6 Q6FI13
ko04145	Phagosome	12	0.00221498	0.044595	Over	Q13885 P17301 P20339 Q03518 P10321 P04439 P13747 Q03519 P08648 P01889 Q71U36 A6NHL2
ko03013	RNA transport	1	0.00317353	0.0599004	Under	Q9BRP8
ko05144	Malaria	4	0.00657172	0.11357	Over	P01584 Q07954 Q14116 P05362
ko03010	Ribosome	1	0.00676907	0.11357	Under	P05386
ko04978	Mineral absorption	5	0.007846	0.12471	Over	P02795 P04732 P80297 P23634 P09601
ko05163	Human cytomegalovirus infection	15	0.0107802	0.157281	Over	P01584 Q03518 P10321 P04439 P63218 P22694 P13747 P61769 Q16611 P42345 Q03519 P01889 P04049 P00533 Q15147
ko05165	Human papillomavirus infection	18	0.0109367	0.157281	Over	P02751 P17301 Q13751 P07942 P10321 P04439 P22694 P13747 Q16611 P42345 P08648 Q13753 P01889 P04049 P20248 Q15334 P24821 P00533
ko04540	Gap junction	7	0.013445	0.184563	Over	Q13885 P22694 Q71U36 P04049 A6NHL2 P00533 Q15147
ko04371	Apelin signaling pathway	9	0.0145641	0.191232	Over	P05121 P63218 P22694 O95166 P42345 P04049 P84022 Q00059 Q15147
ko04218	Cellular senescence	12	0.0167536	0.210816	Over	P05121 P10321 P04439 P13747 P42345 P01889 P04049 P20248 P46734 P84022 P12235 P14635
ko04115	p53 signaling pathway	6	0.0189075	0.228403	Over	P05121 P27701 P31947 Q96PM5 Q658P3 P14635
ko05210	Colorectal cancer	8	0.0207155	0.240618	Over	P11234 Q16611 P42345 P15514 P04049 P43246 P84022 P00533
ko04146	Peroxisome	7	0.0216003	0.241604	Over	P04179 P28288 O14832 Q9UJ83 Q15067 P43155 O14678
ko05169	Epstein-Barr virus infection	13	0.027514	0.296758	Over	P05362 Q03518 P10321 P04439 P46934 P13747 P61769 Q16611 Q03519 O95786 P01889 P20248 P46734
ko05416	Viral myocarditis	5	0.0305435	0.318073	Over	P05362 P10321 P04439 P13747 P01889
ko04974	Protein digestion and absorption	4	0.0316246	0.318354	Over	P20908 P27487 Q15758 P07477
ko05168	Herpes simplex virus 1 infection	12	0.0348851	0.339848	Over	P01584 Q03518 P10321 P04439 P13747 P61769 Q16611 P42345 Q03519 O95786 P08648 P01889
ko05321	Inflammatory bowel disease (IBD)	3	0.0421419	0.392305	Over	P01584 Q14116 P84022
ko04914	Progesterone-mediated oocyte maturation	7	0.0431102	0.392305	Over	P22694 P04049 P20248 Q14807 P14635 P53350 Q58FF6
ko04972	Pancreatic secretion	5	0.0445685	0.392305	Over	P23634 O95716 P07477 P00918 Q15147
ko05170	Human immunodeficiency virus 1 infection	14	0.0454659	0.392305	Over	Q03518 P10321 P04439 P63218 Q9Y281 P13747 P61769 Q16611 P42345 Q03519 P01889 P04049 P46734 P14635
ko05414	Dilated cardiomyopathy (DCM)	5	0.0499715	0.419206	Over	Q9BXT2 P17301 P22694 P09493 P08648
ko00361	Chlorocyclohexane and chlorobenzene degradation	1	0.0618003	0.467207	Over	Q96DG6
ko00364	Fluorobenzoate degradation	1	0.0618003	0.467207	Over	Q96DG6
ko00623	Toluene degradation	1	0.0618003	0.467207	Over	Q96DG6
ko04726	Serotonergic synapse	5	0.0618818	0.467207	Over	P63218 P22694 P04049 P28562 Q15147
ko04962	Vasopressin-regulated water reabsorption	4	0.0649008	0.47805	Over	P52566 P20339 P22694 Q12846
ko04151	PI3K-Akt signaling pathway	14	0.0680618	0.480304	Over	P02751 P17301 Q13751 P07942 P63218 P42345 P08648 Q13753 P15514 P04049 P24821 P29317 P00533 Q58FF6
ko04750	Inflammatory mediator regulation of TRP channels	5	0.0683877	0.480304	Over	P01584 P22694 P55085 P46734 Q15147
ko04060	Cytokine-cytokine receptor interaction	3	0.0720108	0.494256	Over	P01584 Q14116 P15509
ko00240	Pyrimidine metabolism	5	0.0752576	0.505062	Over	P23921 P21589 P33316 P15531 P04818
ko05340	Primary immunodeficiency	2	0.0832729	0.528095	Over	Q03518 Q03519
ko01523	Antifolate resistance	3	0.0835897	0.528095	Over	P01584 Q92820 P04818
ko04621	NOD-like receptor signaling pathway	10	0.0839356	0.528095	Over	P01584 P07858 Q14116 P49662 Q92844 O95166 P32456 P57764 Q15147 Q58FF6
ko04918	Thyroid hormone synthesis	4	0.0910577	0.548807	Over	Q8TED1 P22694 P07203 Q15147
ko04932	Non-alcoholic fatty liver disease (NAFLD)	2	0.0915215	0.548807	Under	P01584 O00483
ko04212	Longevity regulating pathway - worm	7	0.0926793	0.548807	Over	P02795 P04732 P04179 P80297 O95166 P42345 O00767
ko00514	Other types of O-glycan biosynthesis	3	0.0959052	0.556988	Over	Q9Y2G5 Q5NDL2 Q6P9A2
ko05014	Amyotrophic lateral sclerosis (ALS)	4	0.10074	0.574028	Over	P20339 Q8TED1 P07203 P46734
ko05166	Human T-cell leukemia virus 1 infection	11	0.111535	0.616815	Over	P05362 P10321 P04439 P22694 P13747 P61769 P01889 P20248 P84022 P12235 P15407
ko05200	Pathways in cancer	19	0.114005	0.616815	Over	P02751 P11234 P17301 P15509 Q13751 P07942 P63218 P22694 Q16611 P42345 Q13753 P04049 P43246 P20248 P09601 P84022 P00533 Q15147 Q58FF6
ko04610	Complement and coagulation cascades	4	0.121445	0.616815	Over	P05121 P02679 P00749 P13987
ko04623	Cytosolic DNA-sensing pathway	4	0.121445	0.616815	Over	P01584 Q14116 O95786 P61218
ko04976	Bile secretion	3	0.122546	0.616815	Over	P08183 P22694 P00918
ko00680	Methane metabolism	3	0.122546	0.616815	Over	P09104 P09467 Q9Y617
ko03060	Protein export	3	0.122546	0.616815	Over	P61009 Q9Y6A9 Q15005
ko05215	Prostate cancer	6	0.126623	0.625708	Over	P00749 P42345 O43278 P04049 P00533 Q58FF6
ko03015	mRNA surveillance pathway	1	0.129168	0.625708	Under	Q9BRP8
ko00190	Oxidative phosphorylation	2	0.130944	0.625708	Under	Q14061 O00483
ko05167	Kaposi sarcoma-associated herpesvirus infection	10	0.1326	0.625708	Over	P05362 P10321 P04439 P63218 O95166 P13747 Q16611 P42345 P01889 P04049
ko05226	Gastric cancer	6	0.135314	0.628691	Over	P08183 Q16611 P42345 P04049 P84022 P00533
ko05212	Pancreatic cancer	6	0.145663	0.666519	Over	P11234 Q16611 P42345 P04049 P84022 P00533
ko04011	MAPK signaling pathway - yeast	3	0.151518	0.672917	Over	P21695 P46934 P28347
ko00030	Pentose phosphate pathway	3	0.151518	0.672917	Over	O95479 P09467 P11908
ko05410	Hypertrophic cardiomyopathy (HCM)	4	0.155542	0.679751	Over	Q9BXT2 P17301 P09493 P08648
ko05222	Small cell lung cancer	6	0.157558	0.679751	Over	P02751 P17301 Q13751 P07942 Q16611 Q13753
ko04217	Necroptosis	8	0.161291	0.686055	Over	P01584 Q9UQN3 O43633 P12235 Q9Y3E7 Q8IUE6 Q6FI13 Q58FF6
ko04933	AGE-RAGE signaling pathway in diabetic complications	6	0.16405	0.688099	Over	P05121 P02751 P01584 P05362 P84022 Q15147
ko05132	Salmonella infection	13	0.166446	0.688585	Over	P01584 Q14116 P49662 P20339 Q96RF0 Q9BQS8 Q16611 P04049 P46734 P55160 P57764 Q8WUW1 Q58FF6
ko00524	Neomycin, kanamycin and gentamicin biosynthesis	1	0.174203	0.710938	Over	Q2TB90
ko04979	Cholesterol metabolism	3	0.182395	0.730756	Over	Q07954 P61916 Q99523
ko05230	Central carbon metabolism in cancer	5	0.187603	0.730756	Over	Q2TB90 P42345 P04049 Q15758 P00533
ko00590	Arachidonic acid metabolism	2	0.189893	0.730756	Over	Q8TED1 P07203
ko05202	Transcriptional misregulation in cancer	7	0.192463	0.730756	Over	P52926 P00749 Q16611 O43278 P20248 Q71DI3 P68431
ko04912	GnRH signaling pathway	5	0.19287	0.730756	Over	P22694 P04049 P46734 P00533 Q15147
ko05323	Rheumatoid arthritis	3	0.198417	0.730756	Over	P01584 Q14116 P05362
ko04924	Renin secretion	3	0.198417	0.730756	Over	P07858 P22694 Q15147
ko04727	GABAergic synapse	3	0.198417	0.730756	Over	P63218 P22694 O95166
ko04068	FoxO signaling pathway	7	0.203271	0.739611	Over	P04179 O95166 P04049 P84022 P14635 P53350 P00533
ko00750	Vitamin B6 metabolism	1	0.225261	0.794235	Over	Q9Y617
ko05205	Proteoglycans in cancer	10	0.230753	0.794235	Over	P02751 P17301 P00749 P22694 P42345 Q01484 P08648 P04049 P35625 P00533
ko05150	Staphylococcus aureus infection	2	0.236352	0.794235	Over	P02679 P05362
ko05203	Viral carcinogenesis	10	0.24457	0.794235	Over	P10321 P04439 P22694 P13747 Q16611 P01889 P20248 Q99880 P62805 Q6DN03
ko05412	Arrhythmogenic right ventricular cardiomyopathy (ARVC)	3	0.248212	0.794235	Over	Q9BXT2 P17301 P08648
ko04961	Endocrine and other factor-regulated calcium reabsorption	3	0.248212	0.794235	Over	P23634 P22694 Q15147
ko04970	Salivary secretion	3	0.248212	0.794235	Over	P23634 P22694 Q15147
ko01230	Biosynthesis of amino acids	5	0.252373	0.794235	Over	P09104 Q9Y617 Q96C36 P11908 P78540
ko04020	Calcium signaling pathway	5	0.252373	0.794235	Over	P23634 P22694 P12235 P00533 Q15147
ko05164	Influenza A	8	0.259474	0.794235	Over	P01584 Q14116 P05362 Q16611 O95786 P04049 P12235 P07477
ko04080	Neuroactive ligand-receptor interaction	2	0.25983	0.794235	Over	P55085 P07477
ko01040	Biosynthesis of unsaturated fatty acids	2	0.25983	0.794235	Over	Q15067 O00767
ko04070	Phosphatidylinositol signaling system	1	0.260507	0.794235	Under	Q15147
ko04144	Endocytosis	14	0.261649	0.794235	Over	P20339 P10321 Q9UQN3 P04439 P46934 Q9Y6D6 P13747 P01889 Q9NP61 P84022 Q9ULH1 O43633 Q9Y3E7 P00533
ko01200	Carbon metabolism	8	0.267735	0.794235	Over	Q2TB90 P09104 O95479 P09467 Q15067 Q9Y617 P16219 P11908
ko00627	Aminobenzoate degradation	1	0.273168	0.794235	Over	P07311
ko00140	Steroid hormone biosynthesis	1	0.273168	0.794235	Over	Q6UWP2
ko00910	Nitrogen metabolism	1	0.273168	0.794235	Over	P00918
ko04066	HIF-1 signaling pathway	6	0.278919	0.794235	Over	P05121 Q2TB90 P09104 P42345 P09601 P00533
ko04072	Phospholipase D signaling pathway	6	0.278919	0.794235	Over	O14495 P11234 P42345 P04049 P00533 Q15147
ko00500	Starch and sucrose metabolism	2	0.283328	0.794235	Over	Q6PCE3 Q2TB90
ko00410	beta-Alanine metabolism	2	0.283328	0.794235	Over	Q15067 P16219
ko04630	JAK-STAT signaling pathway	4	0.286503	0.794235	Over	P15509 P42345 P04049 P00533
ko04510	Focal adhesion	9	0.303003	0.794235	Over	P02751 P17301 Q13751 P07942 P08648 Q13753 P04049 P24821 P00533
ko04927	Cortisol synthesis and secretion	2	0.306756	0.794235	Over	P22694 Q15147
ko01212	Fatty acid metabolism	4	0.309702	0.794235	Over	Q15067 P49748 P16219 O00767
ko05131	Shigellosis	13	0.313661	0.794235	Over	P01584 Q14116 Q2TB90 P49662 O95166 Q92599 P42345 P08648 Q13185 Q71DI3 P00533 P68431 Q15147
ko04061	Viral protein interaction with cytokine and cytokine receptor	1	0.31812	0.794235	Over	Q14116
ko00521	Streptomycin biosynthesis	1	0.31812	0.794235	Over	Q2TB90
ko00592	alpha-Linolenic acid metabolism	1	0.31812	0.794235	Over	Q15067
ko00740	Riboflavin metabolism	1	0.31812	0.794235	Over	Q8NFF5
ko04650	Natural killer cell mediated cytotoxicity	4	0.318523	0.794235	Over	P05362 Q9BZM5 P04049 Q9BZM4
ko04064	NF-kappa B signaling pathway	4	0.327813	0.794235	Over	P01584 P00749 P05362 O95786
ko05214	Glioma	4	0.327813	0.794235	Over	Q16611 P42345 P04049 P00533
ko04071	Sphingolipid signaling pathway	2	0.328391	0.794235	Under	P04049 Q15147
ko04973	Carbohydrate digestion and absorption	2	0.330032	0.794235	Over	Q2TB90 Q15147
ko04139	Mitophagy - yeast	2	0.330032	0.794235	Over	O95166 P42345
ko00860	Porphyrin and chlorophyll metabolism	2	0.330032	0.794235	Over	P53701 P09601
ko05219	Bladder cancer	2	0.330032	0.794235	Over	P04049 P00533
ko04010	MAPK signaling pathway	10	0.334444	0.794235	Over	Q9BXT2 P01584 Q9Y4G8 P22694 P15514 P04049 P28562 P46734 P29317 P00533
ko01100	Metabolic pathways	40	0.33518	0.794235	Under	Q14697 Q14061 O14495 P23921 Q01432 Q9Y673 Q6PCE3 Q2TB90 P09104 P54803 O00469 P21589 Q8TED1 O94808 O95479 P09467 Q15067 P07203 P07311 Q8NFF5 Q9Y617 Q96C36 P09601 P49748 P16219 P11908 P26358 Q96DG6 P78540 O00483 Q13057 P33316 Q6P9A2 Q9BV57 Q9Y2Z9 P00918 P15531 Q15147 P04818 O00767
ko01521	EGFR tyrosine kinase inhibitor resistance	4	0.337528	0.794235	Over	P30530 P42345 P04049 P00533
ko04141	Protein processing in endoplasmic reticulum	10	0.346452	0.794235	Over	Q14697 Q99942 Q96HE7 Q9P2E9 Q16611 Q9UK22 Q15629 Q5VVQ6 Q99933 Q58FF6
ko04361	Axon regeneration	4	0.347629	0.794235	Over	Q9UKV8 P22694 P42345 Q15147
ko04142	Lysosome	7	0.352139	0.794235	Over	P07858 O75503 P54803 Q9UBR2 P10619 P61916 Q99523
ko05020	Prion diseases	2	0.353086	0.794235	Over	P01584 P22694
ko04930	Type II diabetes mellitus	2	0.353086	0.794235	Over	Q2TB90 P42345
ko05130	Pathogenic Escherichia coli infection	10	0.353784	0.794235	Over	O95832 Q13885 P01584 Q14116 P49662 Q16611 Q71U36 P55160 A6NHL2 Q8WUW1
ko04659	Th17 cell differentiation	4	0.358075	0.794235	Over	P01584 P42345 P84022 Q58FF6
ko04742	Taste transduction	1	0.360298	0.794235	Over	P22694
ko04614	Renin-angiotensin system	1	0.360298	0.794235	Over	P10619
ko04122	Sulfur relay system	1	0.360298	0.794235	Over	Q7Z7A3
ko00512	Mucin type O-glycan biosynthesis	1	0.360298	0.794235	Over	Q6P9A2
ko00130	Ubiquinone and other terpenoid-quinone biosynthesis	1	0.360298	0.794235	Over	Q9Y2Z9
ko00562	Inositol phosphate metabolism	1	0.365729	0.797855	Under	Q15147
ko04015	Rap1 signaling pathway	7	0.367225	0.797855	Over	P11234 Q9Y4G8 P04049 P46734 P29317 P00533 Q15147
ko05211	Renal cell carcinoma	1	0.370049	0.798248	Under	P04049
ko04660	T cell receptor signaling pathway	1	0.37594	0.805204	Under	P04049
ko04714	Thermogenesis	6	0.385333	0.819511	Under	Q14061 P22694 P42345 P46734 O00483 Q330K2
ko04530	Tight junction	8	0.390992	0.825731	Over	O95832 Q9Y4G8 P22694 Q9Y624 P46934 Q71U36 Q15334 A6NHL2
ko04310	Wnt signaling pathway	5	0.393952	0.826205	Over	P22694 P84022 Q01973 P15407 Q15147
ko04935	Growth hormone synthesis, secretion and action	5	0.399593	0.827136	Over	P22694 P42345 P04049 P46734 Q15147
ko04913	Ovarian steroidogenesis	1	0.399874	0.827136	Over	P22694
ko04926	Relaxin signaling pathway	5	0.405635	0.833345	Over	P63218 P22694 P04049 P00533 Q15147
ko05218	Melanoma	3	0.42927	0.869032	Over	Q16611 P04049 P00533
ko00071	Fatty acid degradation	3	0.42927	0.869032	Over	Q15067 P49748 P16219
ko00220	Arginine biosynthesis	1	0.437006	0.869032	Over	P78540
ko00510	N-Glycan biosynthesis	3	0.437394	0.869032	Over	Q14697 Q9Y673 Q86YN1
ko04971	Gastric acid secretion	3	0.437394	0.869032	Over	P22694 P00918 Q15147
ko05134	Legionellosis	3	0.446136	0.869245	Over	P01584 Q14116 P49759
ko04916	Melanogenesis	3	0.446136	0.869245	Over	P22694 P04049 Q15147
ko00270	Cysteine and methionine metabolism	3	0.446136	0.869245	Over	Q9Y617 P26358 Q9BV57
ko04622	RIG-I-like receptor signaling pathway	3	0.455423	0.878434	Over	Q92844 O95786 Q13526
ko05217	Basal cell carcinoma	1	0.471846	0.878434	Over	Q16611
ko05133	Pertussis	3	0.475368	0.878434	Over	P01584 Q9Y281 P08648
ko00480	Glutathione metabolism	3	0.475368	0.878434	Over	P23921 Q8TED1 P07203
ko05221	Acute myeloid leukemia	3	0.475368	0.878434	Over	P42345 P04049 P20248
ko04214	Apoptosis - fly	3	0.485902	0.878434	Over	Q96K17 P20290 P00533
ko04713	Circadian entrainment	3	0.485902	0.878434	Over	P63218 P22694 Q15147
ko05213	Endometrial cancer	3	0.485902	0.878434	Over	Q16611 P04049 P00533
ko04150	mTOR signaling pathway	3	0.491561	0.878434	Under	P30622 P42345 P04049
ko04213	Longevity regulating pathway - multiple species	3	0.496736	0.878434	Over	P04179 P22694 P42345
ko04550	Signaling pathways regulating pluripotency of stem cells	3	0.496736	0.878434	Over	P04049 P84022 Q99717
ko00770	Pantothenate and CoA biosynthesis	1	0.504535	0.878434	Over	Q13057
ko04016	MAPK signaling pathway - plant	1	0.504535	0.878434	Over	P15531
ko04626	Plant-pathogen interaction	1	0.504535	0.878434	Over	Q58FF6
ko00983	Drug metabolism - other enzymes	3	0.507817	0.878434	Over	P23921 P33316 P15531
ko04925	Aldosterone synthesis and secretion	3	0.507817	0.878434	Over	P23634 P22694 Q15147
ko04724	Glutamatergic synapse	3	0.507817	0.878434	Over	P63218 P22694 Q15147
ko04014	Ras signaling pathway	7	0.512051	0.878434	Over	P11234 P20339 P63218 P22694 P04049 P29317 P00533
ko00280	Valine, leucine and isoleucine degradation	1	0.514568	0.878434	Under	P16219
ko04137	Mitophagy - animal	1	0.522237	0.878434	Under	O95166
ko04662	B cell receptor signaling pathway	1	0.522237	0.878434	Under	P04049
ko05012	Parkinson disease	4	0.526239	0.878434	Under	O14933 P22694 P12235 O00483
ko05016	Huntington disease	13	0.52761	0.878434	Over	P04179 Q13885 Q8TED1 P42345 P07203 Q71U36 Q00059 P12235 O00483 P61218 A6NHL2 Q15147 P42025
ko04928	Parathyroid hormone synthesis, secretion and action	4	0.529418	0.878434	Over	P22694 P04049 P00533 Q15147
ko05224	Breast cancer	4	0.533749	0.878434	Over	Q16611 P42345 P04049 P00533
ko04975	Fat digestion and absorption	1	0.535205	0.878434	Over	O14495
ko00790	Folate biosynthesis	1	0.535205	0.878434	Over	Q92820
ko04964	Proximal tubule bicarbonate reclamation	1	0.535205	0.878434	Over	P00918
ko00670	One carbon pool by folate	1	0.535205	0.878434	Over	P04818
ko01522	Endocrine resistance	4	0.538527	0.87911	Over	P22694 P42345 P04049 P00533
ko04013	MAPK signaling pathway - fly	4	0.54372	0.882814	Over	P04179 P46734 Q92766 P00533
ko04012	ErbB signaling pathway	4	0.549294	0.885152	Over	P42345 P15514 P04049 P00533
ko04810	Regulation of actin cytoskeleton	8	0.551022	0.885152	Over	P02751 P17301 Q9Y281 P08648 P04049 P55160 Q8WUW1 P00533
ko04320	Dorso-ventral axis formation	1	0.563981	0.898086	Over	P00533
ko05231	Choline metabolism in cancer	4	0.567995	0.898086	Over	O14495 P42345 P04049 P00533
ko05235	PD-L1 expression and PD-1 checkpoint pathway in cancer	4	0.567995	0.898086	Over	P42345 P04049 P46734 P00533
ko04931	Insulin resistance	2	0.581602	0.899841	Under	O94808 P42345
ko04625	C-type lectin receptor signaling pathway	2	0.58165	0.899841	Under	P01584 P04049
ko04380	Osteoclast differentiation	2	0.590193	0.899841	Under	P01584 P15407
ko04341	Hedgehog signaling pathway - fly	1	0.590979	0.899841	Over	P22694
ko04740	Olfactory transduction	1	0.590979	0.899841	Over	P22694
ko05030	Cocaine addiction	1	0.590979	0.899841	Over	P22694
ko04966	Collecting duct acid secretion	1	0.590979	0.899841	Over	P00918
ko04261	Adrenergic signaling in cardiomyocytes	5	0.592941	0.899841	Over	Q9BXT2 P23634 P22694 P09493 Q15147
ko04915	Estrogen signaling pathway	5	0.596018	0.899988	Over	P22694 P04049 P00533 Q15147 Q58FF6
ko00230	Purine metabolism	5	0.599406	0.9006	Over	P23921 Q01432 P21589 P11908 P15531
ko04390	Hippo signaling pathway	5	0.603086	0.901643	Over	P05121 P15514 Q15334 P84022 P28347
ko04921	Oxytocin signaling pathway	5	0.615703	0.90793	Over	Q9BXT2 P22694 P04049 P00533 Q15147
ko00650	Butanoate metabolism	1	0.61631	0.90793	Over	P16219
ko04745	Phototransduction - fly	1	0.61631	0.90793	Over	Q15147
ko04210	Apoptosis	6	0.641196	0.934289	Over	P07858 Q9UBR2 Q16611 Q71U36 P04049 A6NHL2
ko00600	Sphingolipid metabolism	2	0.643484	0.934289	Over	O14495 P54803
ko05032	Morphine addiction	2	0.643484	0.934289	Over	P63218 P22694
ko05010	Alzheimer disease	10	0.651932	0.939165	Under	Q13885 P01584 Q07954 P42345 Q71U36 P04049 P12235 O00483 A6NHL2 Q15147
ko05225	Hepatocellular carcinoma	6	0.653842	0.939165	Over	Q16611 P42345 P04049 P09601 P84022 P00533
ko05160	Hepatitis C	6	0.657467	0.939165	Over	O95832 P09914 Q16611 O95786 P04049 P00533
ko04911	Insulin secretion	2	0.665501	0.939165	Over	P22694 Q15147
ko04136	Autophagy - other	2	0.665501	0.939165	Over	O95166 P42345
ko00330	Arginine and proline metabolism	2	0.665501	0.939165	Over	Q96C36 P78540
ko00640	Propanoate metabolism	2	0.682072	0.949242	Over	Q15067 P16219
ko04130	SNARE interactions in vesicular transport	2	0.682072	0.949242	Over	Q12846 Q9NYM9
ko04929	GnRH secretion	2	0.682072	0.949242	Over	P04049 Q15147
ko00051	Fructose and mannose metabolism	2	0.690705	0.95156	Over	Q2TB90 P09467
ko01110	Biosynthesis of secondary metabolites	18	0.698676	0.95156	Over	O14495 Q01432 Q2TB90 P09104 P21589 P21695 O95479 P09467 Q15067 Q8NFF5 Q9Y617 Q96C36 P09601 P16219 P11908 P78540 Q9Y2Z9 P15531
ko04624	Toll and Imd signaling pathway	2	0.699491	0.95156	Over	Q01484 P46734
ko04216	Ferroptosis	2	0.699491	0.95156	Over	P09601 Q658P3
ko04350	TGF-beta signaling pathway	2	0.699491	0.95156	Over	P84022 Q99717
ko03320	PPAR signaling pathway	2	0.708378	0.955045	Over	Q15067 O00767
ko04730	Long-term depression	2	0.708378	0.955045	Over	P04049 Q15147
ko00310	Lysine degradation	1	0.719862	0.959117	Under	O00469
ko04917	Prolactin signaling pathway	1	0.721104	0.959117	Under	P04049
ko04920	Adipocytokine signaling pathway	1	0.722486	0.959117	Under	P42345
ko04370	VEGF signaling pathway	1	0.726596	0.959117	Under	P04049
ko04720	Long-term potentiation	3	0.732271	0.959117	Over	P22694 P04049 Q15147
ko04620	Toll-like receptor signaling pathway	3	0.739252	0.959117	Over	P01584 Q9H0E2 P46734
ko04657	IL-17 signaling pathway	3	0.743157	0.959117	Over	P01584 P15407 Q58FF6
ko04725	Cholinergic synapse	3	0.743157	0.959117	Over	P63218 P22694 Q15147
ko04270	Vascular smooth muscle contraction	3	0.743157	0.959117	Over	P22694 P04049 Q15147
ko05223	Non-small cell lung cancer	3	0.743157	0.959117	Over	Q16611 P04049 P00533
ko00010	Glycolysis / Gluconeogenesis	3	0.747299	0.960359	Over	Q2TB90 P09104 P09467
ko05017	Spinocerebellar ataxia	2	0.767843	0.982578	Under	P42345 Q15147
ko04113	Meiosis - yeast	2	0.771451	0.98303	Under	P22694 P42345
ko05100	Bacterial invasion of epithelial cells	4	0.778877	0.984187	Over	P02751 Q92599 P08648 Q9Y5K6
ko05145	Toxoplasmosis	4	0.778877	0.984187	Over	Q13751 P07942 Q13753 P46734
ko04666	Fc gamma R-mediated phagocytosis	4	0.789355	0.993271	Over	O14495 Q9Y281 P04049 Q9ULH1
ko04722	Neurotrophin signaling pathway	3	0.797631	0.99779	Under	P52566 Q99523 P04049
ko04114	Oocyte meiosis	3	0.799553	0.99779	Under	P22694 P14635 P53350
ko04360	Axon guidance	5	0.809761	1	Over	O75326 O75093 Q9Y281 P04049 P29317
ko04120	Ubiquitin mediated proteolysis	6	0.826699	1	Over	O14933 P46934 Q96PM5 Q9UK22 P49459 P63146
ko04140	Autophagy - animal	6	0.831442	1	Over	P07858 Q92844 P22694 O95166 P42345 P04049
ko01120	Microbial metabolism in diverse environments	8	0.850166	1	Over	Q2TB90 P09104 P09467 P07311 Q9Y617 P16219 P11908 Q96DG6
ko05142	Chagas disease (American trypanosomiasis)	3	1	1	Under	P05121 P01584 Q15147
ko04260	Cardiac muscle contraction	2	1	1	Under	Q9BXT2 P09493
ko04611	Platelet activation	4	1	1	Over	P02679 P17301 P22694 Q15147
ko05135	Yersinia infection	5	1	1	Under	P02751 P01584 Q14116 P08648 P46734
ko00561	Glycerolipid metabolism	1	1	1	Under	O14495
ko00564	Glycerophospholipid metabolism	2	1	1	Under	O14495 P21695
ko00565	Ether lipid metabolism	1	1	1	Under	O14495
ko04211	Longevity regulating pathway	3	1	1	Under	P04179 P22694 P42345
ko04670	Leukocyte transendothelial migration	3	1	1	Under	O95832 P05362 Q9Y624
ko05110	Vibrio cholerae infection	2	1	1	Under	Q96HE7 P22694
ko04668	TNF signaling pathway	3	1	1	Under	P01584 P05362 P46734
ko05140	Leishmaniasis	1	1	1	Under	P01584
ko05152	Tuberculosis	4	1	1	Under	P01584 Q14116 P20339 P04049
ko05162	Measles	4	1	1	Under	P01584 Q16611 Q96PM5 O95786
ko05418	Fluid shear stress and atherosclerosis	5	1	1	Over	P01584 P05362 P09601 P28562 Q58FF6
ko00052	Galactose metabolism	1	1	1	Under	Q2TB90
ko00520	Amino sugar and nucleotide sugar metabolism	2	1	1	Under	Q2TB90 O94808
ko04910	Insulin signaling pathway	5	1	1	Under	Q2TB90 P22694 P09467 P42345 P04049
ko03018	RNA degradation	3	1	1	Under	P09104 Q9UIV1 O15116
ko04022	cGMP-PKG signaling pathway	4	1	1	Under	P23634 P04049 P12235 Q15147
ko04024	cAMP signaling pathway	4	1	1	Under	P23634 P22694 Q15067 P04049
ko00760	Nicotinate and nicotinamide metabolism	1	1	1	Under	P21589
ko04062	Chemokine signaling pathway	4	1	1	Under	P63218 P22694 P04049 Q15147
ko04723	Retrograde endocannabinoid signaling	4	1	1	Under	P63218 P22694 O00483 Q15147
ko04728	Dopaminergic synapse	3	1	1	Under	P63218 P22694 Q15147
ko04138	Autophagy - yeast	3	1	1	Under	P22694 O95166 P42345
ko04340	Hedgehog signaling pathway	1	1	1	Over	P22694
ko04919	Thyroid hormone signaling pathway	4	1	1	Under	P22694 P42345 P04049 Q15147
ko04922	Glucagon signaling pathway	3	1	1	Under	P22694 P09467 Q15147
ko04923	Regulation of lipolysis in adipocytes	1	1	1	Under	P22694
ko04934	Cushing syndrome	3	1	1	Under	P22694 P00533 Q15147
ko05031	Amphetamine addiction	1	1	1	Under	P22694
ko05120	Epithelial cell signaling in Helicobacter pylori infection	2	1	1	Under	Q9Y624 P00533
ko00250	Alanine, aspartate and glutamate metabolism	1	1	1	Over	O94808
ko04110	Cell cycle	5	1	1	Under	P31947 P20248 P84022 P14635 P53350
ko04960	Aldosterone-regulated sodium reabsorption	1	1	1	Under	P31947
ko01524	Platinum drug resistance	2	1	1	Under	Q16611 P43246
ko04215	Apoptosis - multiple species	1	1	1	Under	Q16611
ko05216	Thyroid cancer	1	1	1	Under	Q16611
ko05220	Chronic myeloid leukemia	3	1	1	Under	Q16611 P04049 P84022
ko00710	Carbon fixation in photosynthetic organisms	1	1	1	Under	P09467
ko04152	AMPK signaling pathway	4	1	1	Under	P09467 P42345 P20248 O00767
ko05161	Hepatitis B	5	1	1	Under	O95786 P04049 P20248 P46734 P84022
ko00620	Pyruvate metabolism	1	1	1	Under	P07311
ko03050	Proteasome	2	1	1	Under	P28062 Q9Y244
ko00260	Glycine, serine and threonine metabolism	1	1	1	Under	Q9Y617
ko04664	Fc epsilon RI signaling pathway	2	1	1	Under	P04049 P46734
ko03430	Mismatch repair	1	1	1	Under	P43246
ko03030	DNA replication	1	1	1	Under	P49643
ko04391	Hippo signaling pathway - fly	2	1	1	Under	Q15334 P28347
ko04520	Adherens junction	2	1	1	Under	P84022 P00533
ko03440	Homologous recombination	1	1	1	Under	Q13472
ko03460	Fanconi anemia pathway	1	1	1	Under	Q13472
ko03008	Ribosome biogenesis in eukaryotes	4	1	1	Under	Q9BVP2 Q9BRS2 Q9NV31 Q9Y324
ko03020	RNA polymerase	1	1	1	Under	P61218
ko04392	Hippo signaling pathway - multiple species	1	1	1	Over	P28347
